# Supplementary material for: Transcriptomic Characteristics Associated With Aging in the Thyroid Gland
Source: Front Nutr. 2022 May 25;9:859702. doi: 10.3389/fnut.2022.859702 (PMC9174607; doi:10.3389/fnut.2022.859702)
Supplement: Supplementary file 1 [file Table_1.XLSX]

## Sheet: Supplementary Table 1
Supplementary Table 1. Complete list of Spearman rank correlations between gene expression and age in TCGA samples (n=58)
Ensembl ID	Rho	FDR
ENSG00000172458.4	0.6311	0.00191353
ENSG00000159251.6	0.6363	0.00210188
ENSG00000114854.6	0.6141	0.0025858
ENSG00000224259.4	0.6066	0.00295138
ENSG00000146013.9	0.6149	0.00297577
ENSG00000138696.9	0.6019	0.00306704
ENSG00000196767.6	0.6037	0.00307542
ENSG00000271447.4	0.6074	0.00323234
ENSG00000103154.8	0.6393	0.0034902
ENSG00000103175.9	0.615	0.00369469
ENSG00000188729.5	0.5919	0.00475417
ENSG00000124343.11	0.5895	0.00493568
ENSG00000189129.12	0.5874	0.00508483
ENSG00000197380.9	0.5837	0.00571613
ENSG00000170276.5	0.576	0.00784899
ENSG00000174307.6	0.5674	0.0105987
ENSG00000147588.6	0.5683	0.0107562
ENSG00000149557.11	0.5623	0.012095
ENSG00000273777.3	-0.5629	0.0124152
ENSG00000175229.6	0.5596	0.0124397
ENSG00000005243.8	0.5604	0.0125908
ENSG00000105767.2	0.5562	0.0127744
ENSG00000163331.9	0.555	0.0129839
ENSG00000197614.9	0.5564	0.0131974
ENSG00000179256.2	0.5567	0.013625
ENSG00000112319.16	0.553	0.0136585
ENSG00000160801.12	0.5492	0.0151371
ENSG00000167641.9	0.5493	0.0155921
ENSG00000205221.11	0.5473	0.0159294
ENSG00000233098.7	0.546	0.016307
ENSG00000173511.8	0.5439	0.0173576
ENSG00000244694.6	0.5424	0.0179863
ENSG00000139144.8	0.5392	0.0200957
ENSG00000170419.9	0.5381	0.0205441
ENSG00000104888.8	0.5341	0.0230224
ENSG00000127324.7	0.5347	0.0230938
ENSG00000162383.10	0.5332	0.0233519
ENSG00000184599.12	0.5325	0.0234191
ENSG00000170323.7	0.5302	0.0252535
ENSG00000145861.7	0.5285	0.0264631
ENSG00000141698.15	0.5269	0.0275541
ENSG00000177363.4	0.5248	0.0294994
ENSG00000172935.8	0.5216	0.0314066
ENSG00000225465.8	-0.5227	0.0315065
ENSG00000004776.10	0.522	0.0316293
ENSG00000139433.8	0.5198	0.0331329
ENSG00000205363.5	0.5174	0.0359095
ENSG00000187151.6	0.5164	0.0365652
ENSG00000069535.13	0.515	0.0379612
ENSG00000183605.15	0.5133	0.0399048
ENSG00000132423.9	0.5123	0.0407981
ENSG00000250360.1	0.5109	0.0422729
ENSG00000184702.16	0.5075	0.0476164
ENSG00000223802.6	0.5062	0.0492377
ENSG00000099864.16	0.5055	0.0495761
ENSG00000185088.11	0.5048	0.0501412
ENSG00000164089.7	0.5034	0.0512346
ENSG00000228439.4	0.5035	0.0519119
ENSG00000051128.17	0.5019	0.0532908
ENSG00000267532.3	0.4972	0.0601654
ENSG00000170477.11	0.4983	0.0603773
ENSG00000163071.9	0.4978	0.0606874
ENSG00000149090.10	0.4972	0.0610782
ENSG00000102683.7	0.4957	0.0617675
ENSG00000117691.8	0.4958	0.062444
ENSG00000180318.3	0.4938	0.0633467
ENSG00000128266.8	0.4944	0.0638505
ENSG00000162444.11	0.4939	0.064174
ENSG00000137463.4	0.4915	0.0644181
ENSG00000161281.9	0.4929	0.06471
ENSG00000259663.2	0.4921	0.0648017
ENSG00000266964.4	0.491	0.0649713
ENSG00000135617.3	0.4916	0.0651701
ENSG00000243422.1	0.4921	0.0657106
ENSG00000198756.9	0.49	0.0664289
ENSG00000250327.1	0.4895	0.06681
ENSG00000181026.14	0.4879	0.0690899
ENSG00000259245.1	0.4882	0.0692715
ENSG00000185608.7	0.4864	0.0696519
ENSG00000225127.2	0.4867	0.0697367
ENSG00000148180.15	0.4853	0.069958
ENSG00000072954.5	0.4847	0.0700457
ENSG00000174939.9	-0.4855	0.0702578
ENSG00000269907.1	-0.4868	0.0703682
ENSG00000233608.3	0.4858	0.0704211
ENSG00000168079.15	0.4848	0.0705895
ENSG00000149435.11	0.4869	0.0709557
ENSG00000197561.5	0.4837	0.0718489
ENSG00000126218.10	0.4826	0.072439
ENSG00000185652.10	0.4826	0.0730845
ENSG00000143028.8	0.4827	0.0735429
ENSG00000173581.6	0.4817	0.0738686
ENSG00000109743.9	0.4813	0.0742918
ENSG00000161513.10	0.4804	0.0744157
ENSG00000251624.1	0.4804	0.0751213
ENSG00000119938.8	0.4807	0.0752312
ENSG00000071991.7	0.4792	0.0769457
ENSG00000232023.2	0.4766	0.083776
ENSG00000138795.8	-0.4754	0.0841193
ENSG00000114023.14	0.4762	0.0841413
ENSG00000234546.2	0.4758	0.0843732
ENSG00000143001.4	0.4755	0.0846208
ENSG00000110080.17	0.4747	0.085347
ENSG00000273186.1	0.4735	0.0858095
ENSG00000164972.11	0.4743	0.0858524
ENSG00000117013.13	0.4732	0.085968
ENSG00000264038.1	0.4736	0.08612
ENSG00000263946.1	0.4737	0.086732
ENSG00000116133.10	0.4725	0.0874249
ENSG00000162641.17	0.4716	0.0884158
ENSG00000064205.9	0.4713	0.0886773
ENSG00000166033.10	0.4696	0.0887791
ENSG00000156959.8	0.4716	0.0892154
ENSG00000160013.7	0.4706	0.0892417
ENSG00000168484.11	0.4708	0.0893383
ENSG00000091483.6	0.4691	0.0893761
ENSG00000172346.13	0.4696	0.0894024
ENSG00000115129.12	0.4697	0.0898555
ENSG00000103710.9	0.4697	0.0904903
ENSG00000165802.18	0.468	0.0906932
ENSG00000166557.11	0.4675	0.0910591
ENSG00000225511.5	0.4698	0.0910771
ENSG00000184601.9	0.4677	0.0911046
ENSG00000164128.5	0.4681	0.0911612
ENSG00000113758.12	0.4682	0.0916143
ENSG00000158104.10	0.4669	0.0920105
ENSG00000132000.10	0.4658	0.0950411
ENSG00000189058.7	0.4645	0.0951415
ENSG00000143867.6	0.4653	0.0952765
ENSG00000196616.11	0.4636	0.095294
ENSG00000280251.1	-0.4633	0.0953328
ENSG00000184254.15	0.4637	0.09559
ENSG00000262919.6	0.4647	0.0956366
ENSG00000260025.1	0.4645	0.0956648
ENSG00000151468.10	0.4649	0.0957499
ENSG00000121898.11	0.4638	0.095853
ENSG00000136535.13	0.4653	0.0958919
ENSG00000268307.1	0.4639	0.0962692
ENSG00000119185.11	0.4628	0.0963004
ENSG00000247193.2	0.4624	0.0963457
ENSG00000143198.11	0.4624	0.097031
ENSG00000127220.5	0.4614	0.097807
ENSG00000166173.10	0.4615	0.0980709
ENSG00000174099.9	0.4617	0.0982592
ENSG00000178718.6	0.461	0.0984093
ENSG00000202474.1	0.4607	0.0986967
ENSG00000232021.5	-0.4602	0.0997501
ENSG00000167779.6	0.4582	0.100115
ENSG00000177679.15	0.4584	0.100214
ENSG00000196666.4	0.4585	0.100343
ENSG00000167157.10	0.4579	0.100499
ENSG00000213465.6	0.4577	0.100518
ENSG00000231789.2	0.4592	0.100553
ENSG00000109846.6	0.4598	0.100611
ENSG00000067840.11	0.4585	0.10097
ENSG00000115468.10	0.4595	0.101003
ENSG00000016082.13	0.4593	0.101089
ENSG00000198860.10	0.4586	0.101225
ENSG00000214100.7	0.4587	0.101791
ENSG00000265763.3	0.4558	0.103424
ENSG00000125877.11	0.4565	0.103655
ENSG00000115363.12	0.4566	0.103794
ENSG00000234636.2	0.456	0.10393
ENSG00000090013.8	0.4558	0.103946
ENSG00000134020.7	0.4561	0.104458
ENSG00000237233.2	0.4549	0.104876
ENSG00000228350.1	0.4546	0.105355
ENSG00000240694.7	0.4549	0.105497
ENSG00000175084.10	0.455	0.105533
ENSG00000279535.1	0.4543	0.105746
ENSG00000226968.1	-0.454	0.105969
ENSG00000206062.4	0.4536	0.106864
ENSG00000239354.1	0.4532	0.107663
ENSG00000214575.8	0.4529	0.108241
ENSG00000224389.7	-0.4523	0.108494
ENSG00000034239.9	0.4526	0.108632
ENSG00000135744.7	0.4518	0.108709
ENSG00000276505.1	0.4519	0.108831
ENSG00000174348.12	0.4523	0.10911
ENSG00000126460.9	0.4519	0.109299
ENSG00000148334.13	0.4513	0.109792
ENSG00000134216.17	0.4508	0.111175
ENSG00000223446.1	0.4498	0.114221
ENSG00000134590.12	0.4495	0.114973
ENSG00000188833.8	0.4491	0.115092
ENSG00000179399.12	0.4484	0.115188
ENSG00000253304.1	0.4487	0.115311
ENSG00000133115.10	-0.4491	0.115553
ENSG00000110955.7	0.4485	0.115611
ENSG00000088836.11	0.4488	0.115772
ENSG00000196139.10	0.4481	0.115857
ENSG00000100196.9	0.4479	0.116018
ENSG00000133315.9	0.4477	0.116037
ENSG00000226973.1	-0.4473	0.116604
ENSG00000219607.3	0.4474	0.116871
ENSG00000171067.9	0.447	0.117222
ENSG00000162076.11	0.4468	0.117464
ENSG00000178980.13	0.4464	0.118164
ENSG00000054148.16	0.4461	0.118958
ENSG00000076604.13	0.4457	0.119758
ENSG00000108823.14	0.4449	0.120097
ENSG00000221232.1	-0.4452	0.120208
ENSG00000220643.1	-0.4453	0.120228
ENSG00000145708.9	0.4449	0.120474
ENSG00000070404.8	0.4453	0.120777
ENSG00000153902.12	0.444	0.121111
ENSG00000136546.12	0.4444	0.121416
ENSG00000169750.7	0.4443	0.12143
ENSG00000161544.8	0.4441	0.121549
ENSG00000274956.2	0.4437	0.121903
ENSG00000149591.15	0.4432	0.122807
ENSG00000161642.16	0.4433	0.123112
ENSG00000151632.15	0.442	0.123124
ENSG00000173239.12	-0.4418	0.123163
ENSG00000185340.14	0.4422	0.123381
ENSG00000128274.14	0.4403	0.12342
ENSG00000122043.9	-0.4429	0.123606
ENSG00000158747.12	0.442	0.123624
ENSG00000197766.6	0.4403	0.123761
ENSG00000245812.2	0.4422	0.123918
ENSG00000165629.18	0.4415	0.123995
ENSG00000078668.12	0.4407	0.124015
ENSG00000255160.4	-0.4404	0.124159
ENSG00000274002.1	0.441	0.12416
ENSG00000108528.12	0.4399	0.124306
ENSG00000124212.5	0.4424	0.12432
ENSG00000166426.7	0.4409	0.124361
ENSG00000218424.2	-0.4422	0.124464
ENSG00000226436.1	-0.4404	0.124493
ENSG00000272428.1	0.4412	0.124507
ENSG00000198483.11	0.4407	0.124516
ENSG00000151715.6	0.4425	0.124517
ENSG00000125821.10	0.4411	0.124593
ENSG00000263080.1	-0.4388	0.12833
ENSG00000237647.7	0.4386	0.128622
ENSG00000164530.12	0.4365	0.128743
ENSG00000167994.10	0.4366	0.129202
ENSG00000126458.3	0.4366	0.129657
ENSG00000115844.9	0.4367	0.129826
ENSG00000163815.5	0.4367	0.130053
ENSG00000109610.5	0.438	0.130264
ENSG00000205054.5	0.4378	0.13035
ENSG00000225950.6	0.4367	0.130579
ENSG00000235268.2	-0.4376	0.130689
ENSG00000276715.3	0.438	0.130694
ENSG00000067836.11	0.4368	0.13077
ENSG00000173141.4	0.4371	0.131215
ENSG00000173535.12	0.4368	0.131266
ENSG00000164106.6	0.4369	0.131436
ENSG00000163520.12	0.4371	0.131556
ENSG00000240935.5	-0.4372	0.131801
ENSG00000197177.14	0.4356	0.13238
ENSG00000127083.7	0.435	0.13423
ENSG00000272189.1	0.4348	0.134368
ENSG00000226853.2	0.4345	0.135374
ENSG00000250971.1	0.4341	0.136069
ENSG00000183850.12	-0.4342	0.13607
ENSG00000173153.12	0.433	0.136699
ENSG00000242952.1	-0.433	0.137064
ENSG00000176720.4	0.4328	0.137093
ENSG00000235508.3	-0.433	0.137491
ENSG00000240771.5	0.4335	0.137631
ENSG00000124159.14	0.4331	0.137639
ENSG00000204305.12	0.4336	0.137682
ENSG00000006016.9	0.4332	0.137817
ENSG00000088682.12	0.4333	0.13797
ENSG00000167775.9	0.4321	0.139307
ENSG00000125037.11	0.4319	0.139983
ENSG00000100399.14	0.4309	0.141088
ENSG00000237289.8	0.4315	0.141192
ENSG00000162517.11	0.431	0.141389
ENSG00000251493.3	0.4306	0.141609
ENSG00000184983.8	0.4307	0.141635
ENSG00000076344.14	0.431	0.14169
ENSG00000186792.14	0.4303	0.141877
ENSG00000010256.9	0.4312	0.141989
ENSG00000160678.10	0.4311	0.142017
ENSG00000106624.7	0.4303	0.142361
ENSG00000259974.2	0.4282	0.14241
ENSG00000181101.7	-0.4301	0.142443
ENSG00000152234.14	0.4281	0.142498
ENSG00000265354.3	0.4279	0.142579
ENSG00000267131.1	0.4282	0.142602
ENSG00000168268.9	0.4293	0.142865
ENSG00000204564.10	0.4283	0.142953
ENSG00000188783.5	0.4276	0.14299
ENSG00000125445.9	0.4295	0.143011
ENSG00000121068.12	0.4284	0.143026
ENSG00000137547.7	0.4297	0.143194
ENSG00000275278.1	-0.4284	0.143228
ENSG00000228196.1	-0.4277	0.143316
ENSG00000079739.14	0.4293	0.143368
ENSG00000105996.6	0.4295	0.143456
ENSG00000259721.1	0.4285	0.143552
ENSG00000132879.12	0.4297	0.143566
ENSG00000253549.4	0.4288	0.143583
ENSG00000090097.19	0.4285	0.1437
ENSG00000105520.9	0.4272	0.143725
ENSG00000042286.13	0.4273	0.143756
ENSG00000166347.17	0.429	0.14379
ENSG00000151366.11	0.4286	0.1438
ENSG00000102359.5	0.4288	0.143835
ENSG00000102934.8	0.4271	0.143911
ENSG00000017483.13	0.4268	0.14421
ENSG00000196932.10	0.4269	0.144298
ENSG00000169040.13	0.4266	0.144535
ENSG00000270460.1	-0.4263	0.145712
ENSG00000226757.2	-0.4261	0.145853
ENSG00000111906.16	0.4258	0.146783
ENSG00000251076.1	0.4256	0.147196
ENSG00000163710.6	0.4247	0.147385
ENSG00000198832.9	0.4251	0.147802
ENSG00000177459.9	0.4247	0.147811
ENSG00000248228.1	0.4245	0.147878
ENSG00000197921.5	0.4244	0.147954
ENSG00000138777.18	0.4252	0.147991
ENSG00000235917.1	-0.4254	0.148004
ENSG00000179091.4	0.4247	0.148092
ENSG00000105568.16	0.4248	0.148136
ENSG00000146966.11	0.4242	0.14818
ENSG00000154096.12	0.4241	0.148283
ENSG00000173156.5	0.4252	0.148294
ENSG00000129596.4	0.4248	0.148546
ENSG00000257303.1	0.4238	0.14894
ENSG00000279400.1	-0.4236	0.149694
ENSG00000105419.16	0.4233	0.150611
ENSG00000182575.7	0.423	0.151225
ENSG00000266916.4	0.4228	0.151704
ENSG00000261465.5	0.4227	0.151975
ENSG00000166831.7	0.4219	0.15433
ENSG00000087191.11	0.4217	0.154426
ENSG00000164182.9	0.422	0.154473
ENSG00000155366.15	0.4217	0.154712
ENSG00000104823.7	0.422	0.154825
ENSG00000280409.1	-0.4209	0.157845
ENSG00000172172.6	0.4205	0.158113
ENSG00000248593.3	0.4207	0.158113
ENSG00000166482.10	0.4205	0.158495
ENSG00000168273.6	0.42	0.158668
ENSG00000266954.1	-0.4198	0.158708
ENSG00000104325.5	0.4202	0.158852
ENSG00000126088.11	0.4199	0.158983
ENSG00000060762.17	0.42	0.159027
ENSG00000172339.9	0.4202	0.159033
ENSG00000101470.8	0.4195	0.159664
ENSG00000238099.2	0.4192	0.159722
ENSG00000148450.11	0.4193	0.160134
ENSG00000101850.11	0.419	0.160327
ENSG00000153531.11	0.4193	0.160541
ENSG00000119457.7	-0.4184	0.160664
ENSG00000050165.16	0.4183	0.160809
ENSG00000234694.1	0.4186	0.160885
ENSG00000150471.14	0.4185	0.160914
ENSG00000105197.9	0.4184	0.160931
ENSG00000137106.16	0.4188	0.161012
ENSG00000172366.18	0.4186	0.161308
ENSG00000231441.1	0.418	0.161762
ENSG00000269190.4	0.4173	0.164411
ENSG00000127920.5	0.4173	0.164646
ENSG00000187733.6	-0.4168	0.166214
ENSG00000106809.9	0.4167	0.166508
ENSG00000103145.9	0.4164	0.166797
ENSG00000163145.11	0.4163	0.166895
ENSG00000241685.7	0.4165	0.166979
ENSG00000099994.10	0.4162	0.167
ENSG00000230720.1	-0.416	0.167753
ENSG00000170577.7	0.4154	0.170038
ENSG00000279766.1	-0.4153	0.170236
ENSG00000280890.1	0.4151	0.170584
ENSG00000171421.11	0.4151	0.170808
ENSG00000275210.1	-0.4146	0.172026
ENSG00000158806.12	0.4142	0.172191
ENSG00000228175.3	0.4141	0.172238
ENSG00000231532.4	-0.4146	0.172261
ENSG00000072778.18	0.4145	0.172296
ENSG00000159199.12	0.4144	0.172313
ENSG00000072163.17	0.4142	0.172617
ENSG00000250126.1	0.4137	0.173033
ENSG00000004846.15	0.4138	0.173082
ENSG00000214274.8	0.4138	0.173166
ENSG00000021300.12	0.4135	0.173741
ENSG00000122873.10	0.4125	0.176751
ENSG00000117411.15	0.4121	0.177042
ENSG00000197956.8	0.4126	0.177053
ENSG00000185909.13	0.4123	0.177141
ENSG00000159387.7	0.4125	0.177186
ENSG00000267742.1	-0.4127	0.177199
ENSG00000253368.3	0.4122	0.177297
ENSG00000270806.1	0.4126	0.177354
ENSG00000120729.8	0.4118	0.177824
ENSG00000226580.1	0.4117	0.178033
ENSG00000168090.8	0.4118	0.178218
ENSG00000165072.9	0.4116	0.178291
ENSG00000256762.1	-0.4111	0.179195
ENSG00000100577.17	0.4109	0.179438
ENSG00000278133.1	0.4108	0.179496
ENSG00000226471.5	0.4111	0.179569
ENSG00000144712.10	0.4112	0.179578
ENSG00000079616.11	0.4103	0.17966
ENSG00000172350.8	0.4099	0.179733
ENSG00000008382.14	0.4107	0.179737
ENSG00000259092.1	-0.4101	0.179806
ENSG00000172270.17	0.4099	0.179864
ENSG00000231426.4	0.41	0.179891
ENSG00000143819.11	0.4103	0.179907
ENSG00000123560.12	0.4112	0.179966
ENSG00000272397.1	-0.4101	0.180011
ENSG00000101363.11	0.4104	0.180222
ENSG00000205309.12	0.4104	0.180429
ENSG00000081870.10	0.4096	0.180596
ENSG00000122756.13	0.4104	0.180805
ENSG00000213523.8	0.409	0.181906
ENSG00000233778.3	-0.4088	0.182165
ENSG00000130204.11	0.4093	0.182173
ENSG00000140307.9	0.409	0.182344
ENSG00000101335.8	0.409	0.182618
ENSG00000198467.12	0.409	0.182894
ENSG00000125520.12	0.4082	0.185029
ENSG00000236700.4	-0.4081	0.185512
ENSG00000087302.7	0.4077	0.186976
ENSG00000101198.13	0.4075	0.187493
ENSG00000269113.3	0.4074	0.187744
ENSG00000272840.1	0.4073	0.187783
ENSG00000186191.7	-0.4072	0.187903
ENSG00000114378.15	0.4067	0.190397
ENSG00000103876.10	0.4063	0.190696
ENSG00000084636.16	0.4064	0.190969
ENSG00000105711.9	0.4064	0.191376
ENSG00000233508.2	-0.4058	0.191407
ENSG00000065054.12	0.4059	0.191474
ENSG00000111669.13	0.406	0.191532
ENSG00000151729.9	0.4061	0.191631
ENSG00000248300.1	0.4064	0.191722
ENSG00000174899.9	0.4057	0.1918
ENSG00000240138.1	-0.4059	0.191904
ENSG00000137038.7	0.4054	0.192535
ENSG00000106636.6	0.4052	0.192764
ENSG00000173436.12	0.4053	0.192961
ENSG00000099256.17	0.405	0.19322
ENSG00000277972.1	0.405	0.193505
ENSG00000279579.2	0.4046	0.194474
ENSG00000277829.1	0.4047	0.194739
ENSG00000178343.4	0.4045	0.194743
ENSG00000106278.10	0.4042	0.194946
ENSG00000229676.2	-0.4043	0.194962
ENSG00000162426.13	0.4041	0.195368
ENSG00000188690.11	0.4043	0.195372
ENSG00000178449.7	0.404	0.195671
ENSG00000229101.1	-0.4031	0.196079
ENSG00000213593.8	0.4031	0.196222
ENSG00000101473.15	0.4036	0.196264
ENSG00000257084.1	0.4032	0.196264
ENSG00000171819.4	0.4032	0.196303
ENSG00000011465.15	0.4033	0.196529
ENSG00000087250.7	0.4036	0.196612
ENSG00000111404.5	0.4036	0.196836
ENSG00000227531.1	-0.4033	0.196846
ENSG00000223890.1	0.4034	0.196865
ENSG00000213424.7	0.4037	0.196927
ENSG00000132432.12	0.4027	0.197899
ENSG00000138028.13	0.4026	0.19803
ENSG00000099869.7	0.4023	0.198096
ENSG00000213977.6	0.4023	0.198251
ENSG00000145194.16	0.4024	0.198254
ENSG00000264529.1	-0.4021	0.198352
ENSG00000226272.4	-0.4024	0.198497
ENSG00000157613.9	0.4015	0.198722
ENSG00000130167.12	-0.4015	0.199084
ENSG00000175416.11	0.4018	0.19922
ENSG00000115649.14	0.4015	0.199334
ENSG00000100504.15	0.4019	0.199558
ENSG00000118094.10	0.4015	0.199665
ENSG00000165060.10	0.4016	0.200038
ENSG00000115457.8	0.4015	0.200057
ENSG00000099785.9	0.4011	0.200734
ENSG00000084207.14	0.4007	0.201611
ENSG00000165716.8	0.4008	0.201669
ENSG00000225198.1	0.4008	0.201711
ENSG00000071462.10	0.4005	0.202228
ENSG00000231010.1	0.4004	0.202581
ENSG00000108381.9	0.4003	0.202605
ENSG00000242516.1	0.4002	0.202723
ENSG00000179526.15	0.4	0.203417
ENSG00000166166.11	0.3999	0.203736
ENSG00000089472.15	0.3997	0.204434
ENSG00000234327.6	0.3993	0.205745
ENSG00000266959.1	0.3994	0.205768
ENSG00000184831.12	0.3993	0.205803
ENSG00000160075.11	0.3991	0.206051
ENSG00000229891.1	0.3987	0.206446
ENSG00000122971.7	0.398	0.206447
ENSG00000152766.5	-0.398	0.206498
ENSG00000203883.6	0.3985	0.20658
ENSG00000217746.1	-0.3979	0.206612
ENSG00000272293.1	0.3985	0.206688
ENSG00000171202.5	0.3988	0.20672
ENSG00000090539.14	0.3984	0.206858
ENSG00000248388.4	0.3986	0.206903
ENSG00000129946.9	0.398	0.206904
ENSG00000248441.5	0.3981	0.206952
ENSG00000169271.2	0.3988	0.207002
ENSG00000184752.11	0.3982	0.207103
ENSG00000235343.1	0.3981	0.207306
ENSG00000154723.11	0.3988	0.207342
ENSG00000187556.7	0.3982	0.207344
ENSG00000100348.8	0.3975	0.207362
ENSG00000126778.8	0.3976	0.207443
ENSG00000130528.10	0.3974	0.207448
ENSG00000111843.12	0.3976	0.20745
ENSG00000155254.11	0.3988	0.207692
ENSG00000215915.8	0.3971	0.207758
ENSG00000065518.7	0.3972	0.207784
ENSG00000136999.4	0.3972	0.207926
ENSG00000144355.13	0.3973	0.208048
ENSG00000147684.6	0.397	0.208084
ENSG00000274605.1	0.3969	0.208472
ENSG00000215190.7	0.3964	0.208706
ENSG00000277593.1	-0.3963	0.209049
ENSG00000158042.8	0.3964	0.209087
ENSG00000119421.6	0.3966	0.209379
ENSG00000130176.6	0.3966	0.20938
ENSG00000182795.12	0.3964	0.209417
ENSG00000233648.1	-0.3964	0.209755
ENSG00000187634.9	0.3958	0.210303
ENSG00000141741.10	0.3958	0.210572
ENSG00000103415.10	0.3959	0.210624
ENSG00000001036.12	0.3959	0.210693
ENSG00000100285.9	-0.3956	0.210903
ENSG00000217083.1	-0.3953	0.212605
ENSG00000248468.1	0.3951	0.213519
ENSG00000163382.10	0.395	0.213752
ENSG00000131477.9	0.3948	0.214265
ENSG00000223804.4	0.3947	0.214352
ENSG00000117118.8	0.3946	0.214599
ENSG00000189077.9	0.3944	0.214704
ENSG00000201440.1	0.3945	0.214711
ENSG00000174917.7	0.3945	0.214807
ENSG00000132254.11	0.3936	0.215187
ENSG00000269313.4	0.3936	0.215188
ENSG00000255145.2	0.3936	0.215474
ENSG00000174775.15	0.3942	0.215692
ENSG00000248890.1	0.3937	0.215725
ENSG00000125246.14	0.3936	0.215846
ENSG00000251573.2	0.3941	0.21595
ENSG00000105989.7	0.3937	0.216051
ENSG00000119547.5	0.3939	0.216301
ENSG00000100211.9	0.3937	0.216397
ENSG00000256482.1	-0.3938	0.216508
ENSG00000141759.13	0.3939	0.216524
ENSG00000101391.19	0.3928	0.216544
ENSG00000124541.6	0.3933	0.216594
ENSG00000165915.12	0.3932	0.216801
ENSG00000204444.9	0.3928	0.216876
ENSG00000167799.8	0.3928	0.216879
ENSG00000157045.7	0.3929	0.217001
ENSG00000174851.13	0.3929	0.217033
ENSG00000227689.1	-0.3929	0.217356
ENSG00000167397.13	0.393	0.217574
ENSG00000275620.1	0.3924	0.217638
ENSG00000160318.5	0.3925	0.217663
ENSG00000269019.1	0.3923	0.218284
ENSG00000225338.1	-0.3917	0.21887
ENSG00000166199.11	0.392	0.219181
ENSG00000255289.1	-0.3918	0.219198
ENSG00000165283.14	0.3918	0.219201
ENSG00000136521.11	0.392	0.219323
ENSG00000116898.10	0.3915	0.219332
ENSG00000173210.18	0.3919	0.219371
ENSG00000163132.6	0.3916	0.219491
ENSG00000105137.11	0.3919	0.219492
ENSG00000254999.3	0.3907	0.219789
ENSG00000140990.13	0.3914	0.219816
ENSG00000244558.4	0.3913	0.2199
ENSG00000164841.4	0.3904	0.219988
ENSG00000250786.1	0.3907	0.22013
ENSG00000104524.12	0.3905	0.220172
ENSG00000124194.14	0.3908	0.220186
ENSG00000139579.11	0.3905	0.220248
ENSG00000110717.9	0.3906	0.220358
ENSG00000159228.11	0.3908	0.220415
ENSG00000119866.19	-0.3903	0.220503
ENSG00000145423.4	0.391	0.220557
ENSG00000124787.12	0.391	0.220616
ENSG00000125863.16	0.3908	0.220665
ENSG00000124104.17	0.3909	0.220704
ENSG00000274253.3	0.391	0.220884
ENSG00000166228.7	0.3911	0.221099
ENSG00000189320.7	0.3899	0.221851
ENSG00000118939.16	0.39	0.221949
ENSG00000112110.8	0.3899	0.222085
ENSG00000168875.2	0.3896	0.223163
ENSG00000115350.10	0.3895	0.223253
ENSG00000259275.2	0.3896	0.223532
ENSG00000162989.4	0.3892	0.224058
ENSG00000207976.1	0.3891	0.224078
ENSG00000136267.12	0.3891	0.224115
ENSG00000130595.15	0.3891	0.224281
ENSG00000230219.3	-0.3893	0.224378
ENSG00000116678.17	0.3889	0.224452
ENSG00000160396.8	0.3887	0.22542
ENSG00000137090.10	0.3886	0.225548
ENSG00000101844.16	0.3884	0.225636
ENSG00000162482.4	0.3886	0.225681
ENSG00000256590.2	-0.3884	0.225886
ENSG00000138175.8	0.3884	0.226035
ENSG00000130005.10	0.3875	0.226136
ENSG00000270268.1	-0.3875	0.226202
ENSG00000134291.10	0.3873	0.226374
ENSG00000271819.1	-0.3876	0.226379
ENSG00000205155.6	0.3874	0.226502
ENSG00000260710.1	0.3873	0.226564
ENSG00000116661.9	0.3872	0.226566
ENSG00000127184.9	0.3881	0.226605
ENSG00000169184.5	0.3876	0.226639
ENSG00000170890.12	-0.3876	0.226712
ENSG00000095637.19	0.3877	0.226737
ENSG00000149925.15	0.3881	0.226859
ENSG00000197444.8	0.388	0.226888
ENSG00000140939.13	0.3871	0.226975
ENSG00000164129.10	0.3877	0.2271
ENSG00000198468.6	0.387	0.227138
ENSG00000131174.4	0.3869	0.227214
ENSG00000136003.14	0.3881	0.227234
ENSG00000131148.7	0.3877	0.227441
ENSG00000199471.1	-0.3877	0.227635
ENSG00000229914.1	-0.3878	0.227683
ENSG00000197472.13	-0.3867	0.228176
ENSG00000135318.10	0.3866	0.228231
ENSG00000133027.16	0.3866	0.228256
ENSG00000159210.8	0.3862	0.228775
ENSG00000227012.2	-0.3863	0.229028
ENSG00000164405.9	0.3862	0.229099
ENSG00000148290.8	0.3863	0.229278
ENSG00000251632.1	0.3863	0.229393
ENSG00000113068.8	0.386	0.229971
ENSG00000120913.22	0.3852	0.230657
ENSG00000261399.1	0.3858	0.230705
ENSG00000225706.1	0.3852	0.230826
ENSG00000005194.13	0.3855	0.230898
ENSG00000188771.4	0.3856	0.231003
ENSG00000206026.6	0.3854	0.231052
ENSG00000115380.17	0.3852	0.231056
ENSG00000253948.1	0.3857	0.231148
ENSG00000225663.6	0.385	0.231154
ENSG00000211831.2	-0.385	0.231283
ENSG00000150456.9	0.3852	0.231302
ENSG00000260769.1	0.3856	0.231341
ENSG00000049540.15	0.3853	0.231383
ENSG00000123159.14	0.3849	0.231422
ENSG00000167081.15	0.3853	0.231547
ENSG00000162761.13	0.3848	0.231561
ENSG00000183114.7	0.3847	0.231802
ENSG00000110811.18	0.3844	0.233297
ENSG00000130312.5	0.3842	0.234518
ENSG00000178057.13	0.384	0.234951
ENSG00000119812.17	0.3839	0.235027
ENSG00000258162.2	-0.384	0.235168
ENSG00000145337.4	0.3804	0.23518
ENSG00000122121.9	0.3806	0.235186
ENSG00000256799.1	-0.3806	0.235279
ENSG00000126432.12	0.3804	0.235318
ENSG00000198910.11	0.3807	0.235369
ENSG00000147669.9	0.3805	0.235411
ENSG00000186994.10	0.3803	0.235452
ENSG00000107796.11	0.3807	0.235515
ENSG00000143774.15	0.3794	0.235549
ENSG00000184207.8	0.3791	0.235557
ENSG00000158716.7	0.3805	0.235579
ENSG00000104368.16	0.3808	0.235584
ENSG00000184887.12	0.3838	0.235585
ENSG00000187954.11	0.3794	0.235597
ENSG00000136514.2	-0.3793	0.23561
ENSG00000249963.1	-0.3837	0.235704
ENSG00000226212.2	-0.3807	0.235733
ENSG00000262995.1	0.3808	0.235739
ENSG00000120509.9	0.3791	0.235849
ENSG00000116459.9	0.3794	0.235854
ENSG00000172590.17	0.379	0.235866
ENSG00000197079.7	-0.3835	0.235895
ENSG00000075239.12	0.3802	0.235912
ENSG00000237378.2	0.3792	0.235967
ENSG00000099817.10	0.3801	0.23598
ENSG00000013306.14	0.3835	0.236019
ENSG00000167468.15	0.3808	0.236049
ENSG00000103269.12	0.3796	0.236056
ENSG00000175581.12	0.381	0.23606
ENSG00000198721.11	0.3792	0.23609
ENSG00000113845.8	0.3794	0.236113
ENSG00000165609.11	0.3795	0.236126
ENSG00000076641.4	-0.3796	0.236142
ENSG00000087884.13	0.3809	0.236146
ENSG00000137288.8	0.3797	0.236168
ENSG00000261183.4	0.3795	0.236199
ENSG00000127743.5	0.3834	0.236208
ENSG00000116288.11	0.3836	0.236336
ENSG00000107262.15	0.3835	0.236338
ENSG00000178821.11	0.3809	0.236347
ENSG00000250320.4	0.3798	0.236359
ENSG00000177669.3	-0.381	0.236389
ENSG00000235570.1	0.381	0.236445
ENSG00000162384.12	0.3797	0.236467
ENSG00000152463.13	0.3833	0.236518
ENSG00000198668.9	0.3799	0.23658
ENSG00000240366.1	0.3788	0.236588
ENSG00000167733.12	0.3788	0.236594
ENSG00000103502.12	0.381	0.236667
ENSG00000213619.8	0.3811	0.236668
ENSG00000227225.1	0.3799	0.236713
ENSG00000140297.11	0.3797	0.236763
ENSG00000214866.6	0.3822	0.236802
ENSG00000123545.5	0.3788	0.236825
ENSG00000117419.13	0.3823	0.236841
ENSG00000140961.11	0.3823	0.236853
ENSG00000102805.12	0.3799	0.236905
ENSG00000199370.2	-0.3824	0.236947
ENSG00000224429.6	-0.3786	0.236958
ENSG00000149564.10	0.3824	0.236979
ENSG00000236457.1	-0.3811	0.236985
ENSG00000088386.14	0.3797	0.237011
ENSG00000175646.3	-0.3786	0.23707
ENSG00000167863.10	0.3824	0.23713
ENSG00000115307.15	0.382	0.237132
ENSG00000270028.1	0.3785	0.237149
ENSG00000197461.12	0.3784	0.237176
ENSG00000162910.17	0.382	0.237184
ENSG00000182383.8	-0.3811	0.237201
ENSG00000237190.3	0.3785	0.237214
ENSG00000148734.7	0.3825	0.237277
ENSG00000171596.6	0.382	0.237377
ENSG00000165264.9	0.3811	0.237382
ENSG00000103089.7	0.3825	0.237404
ENSG00000076043.8	0.3831	0.237443
ENSG00000002586.16	0.3826	0.237447
ENSG00000272549.1	0.3819	0.237494
ENSG00000189043.8	0.3812	0.237502
ENSG00000134259.3	0.3812	0.237517
ENSG00000104522.14	0.3815	0.237578
ENSG00000266317.2	-0.3826	0.237625
ENSG00000165916.7	0.382	0.237626
ENSG00000232838.3	0.3815	0.237707
ENSG00000149452.14	-0.3826	0.237795
ENSG00000099341.10	0.3812	0.237842
ENSG00000223658.6	0.3829	0.23789
ENSG00000118729.11	0.3813	0.237922
ENSG00000167700.7	0.3817	0.237987
ENSG00000164062.11	0.3816	0.237993
ENSG00000267328.1	0.3815	0.238001
ENSG00000114779.18	0.3826	0.238007
ENSG00000244187.6	0.3812	0.238045
ENSG00000196923.12	0.3817	0.238047
ENSG00000211459.2	0.3779	0.238057
ENSG00000132517.13	0.3779	0.238064
ENSG00000198712.1	0.3828	0.238067
ENSG00000266524.2	0.3813	0.238093
ENSG00000183087.13	0.3827	0.2382
ENSG00000102104.8	0.3782	0.238222
ENSG00000147155.9	0.3815	0.238247
ENSG00000124588.18	0.378	0.23825
ENSG00000224238.2	0.3828	0.238256
ENSG00000143575.13	0.3778	0.238336
ENSG00000169972.10	0.3777	0.238356
ENSG00000157778.7	0.378	0.238413
ENSG00000263627.1	0.3827	0.238504
ENSG00000164764.10	0.3777	0.238564
ENSG00000235007.2	-0.3774	0.238591
ENSG00000173918.13	0.378	0.238716
ENSG00000102452.14	0.3776	0.238783
ENSG00000164258.10	0.3781	0.238814
ENSG00000105518.12	0.378	0.238833
ENSG00000261105.4	0.3774	0.238837
ENSG00000149743.12	0.3763	0.238935
ENSG00000250479.7	0.3761	0.238984
ENSG00000228399.1	-0.3761	0.239015
ENSG00000197982.13	0.3774	0.239037
ENSG00000277287.1	0.3761	0.239153
ENSG00000101463.5	0.3763	0.239236
ENSG00000071889.15	0.3775	0.239263
ENSG00000166183.14	0.3762	0.239305
ENSG00000058799.12	0.3764	0.239317
ENSG00000254740.2	0.3756	0.23934
ENSG00000226332.2	0.3774	0.239343
ENSG00000139180.9	0.3772	0.239491
ENSG00000236497.1	-0.3764	0.239524
ENSG00000112852.6	0.3762	0.239544
ENSG00000124570.16	0.3756	0.239551
ENSG00000237520.1	-0.3759	0.239561
ENSG00000261033.1	0.3757	0.239567
ENSG00000077942.16	0.3759	0.239764
ENSG00000149489.7	0.3755	0.23977
ENSG00000156466.9	0.3757	0.239813
ENSG00000253509.1	-0.3758	0.239821
ENSG00000261316.1	0.3764	0.239825
ENSG00000174915.10	0.3764	0.239831
ENSG00000254604.1	0.3758	0.239866
ENSG00000166171.11	0.3767	0.239955
ENSG00000254139.1	0.3766	0.240067
ENSG00000262543.1	-0.3754	0.240079
ENSG00000216657.1	-0.3764	0.24009
ENSG00000229670.2	-0.3757	0.240101
ENSG00000165140.8	0.3768	0.240102
ENSG00000110536.12	0.3753	0.240225
ENSG00000163832.14	0.3765	0.24026
ENSG00000166311.8	0.3766	0.240279
ENSG00000267075.1	0.3765	0.240335
ENSG00000165948.9	0.3768	0.240343
ENSG00000273442.1	0.3764	0.240368
ENSG00000159212.11	0.3768	0.24041
ENSG00000223126.1	-0.377	0.240525
ENSG00000251491.2	0.3768	0.240557
ENSG00000136522.12	0.3768	0.240729
ENSG00000141338.12	0.3769	0.240853
ENSG00000062096.13	0.3752	0.24095
ENSG00000269791.4	0.3751	0.241069
ENSG00000159674.10	0.375	0.241078
ENSG00000107175.9	0.375	0.241126
ENSG00000212747.4	0.3751	0.241323
ENSG00000023191.15	0.3748	0.241427
ENSG00000279193.1	0.3748	0.241625
ENSG00000109113.16	0.3743	0.244512
ENSG00000130560.7	0.3742	0.244579
ENSG00000169718.16	0.3741	0.244581
ENSG00000168481.7	0.3742	0.244614
ENSG00000163481.6	0.3741	0.244721
ENSG00000256779.1	-0.3736	0.24479
ENSG00000249307.4	0.3736	0.244878
ENSG00000109016.16	0.3739	0.244898
ENSG00000124493.12	-0.374	0.24501
ENSG00000238241.1	-0.3738	0.245013
ENSG00000280286.1	-0.3737	0.245081
ENSG00000137133.9	0.3736	0.245154
ENSG00000184076.12	0.3739	0.245157
ENSG00000177096.7	0.3739	0.245417
ENSG00000174951.9	0.3736	0.245425
ENSG00000184990.11	0.3733	0.245592
ENSG00000174807.3	0.3733	0.245886
ENSG00000106245.8	0.3734	0.246073
ENSG00000254607.2	-0.3733	0.246144
ENSG00000147869.4	0.373	0.246861
ENSG00000124225.14	0.3731	0.246867
ENSG00000131373.13	0.3729	0.247386
ENSG00000251689.1	-0.3728	0.247483
ENSG00000185761.9	0.3728	0.247621
ENSG00000249706.1	0.3726	0.247905
ENSG00000132693.11	-0.3726	0.248036
ENSG00000007541.13	0.3726	0.248255
ENSG00000167705.10	0.3724	0.24875
ENSG00000051620.9	0.3721	0.250282
ENSG00000154518.8	0.3717	0.251311
ENSG00000172428.9	0.3717	0.251557
ENSG00000168453.13	0.3717	0.251594
ENSG00000262686.1	0.3716	0.251635
ENSG00000102466.14	0.3717	0.251768
ENSG00000034971.13	0.3718	0.251842
ENSG00000101460.11	0.3719	0.25186
ENSG00000270431.1	0.3718	0.252024
ENSG00000214593.3	-0.3715	0.25206
ENSG00000176022.4	0.3712	0.252231
ENSG00000134056.10	0.3712	0.25241
ENSG00000149633.10	0.3712	0.252628
ENSG00000131828.12	0.3712	0.252869
ENSG00000105618.12	0.3713	0.253087
ENSG00000232046.5	0.3712	0.253115
ENSG00000207383.1	0.3706	0.254935
ENSG00000125166.11	0.3707	0.254994
ENSG00000216866.5	-0.3706	0.255217
ENSG00000222035.3	-0.3707	0.25523
ENSG00000110628.12	0.3706	0.255253
ENSG00000163170.10	0.3703	0.256229
ENSG00000176396.9	0.3702	0.256556
ENSG00000261273.1	0.3701	0.256961
ENSG00000180660.7	0.3701	0.257218
ENSG00000241622.1	0.37	0.257279
ENSG00000105696.7	0.3698	0.258436
ENSG00000064195.7	0.3696	0.258884
ENSG00000013275.6	0.3696	0.259114
ENSG00000200254.1	-0.3696	0.259178
ENSG00000212864.3	0.3692	0.260613
ENSG00000151500.13	0.3692	0.260777
ENSG00000134198.8	0.3693	0.260787
ENSG00000244593.1	-0.3691	0.26091
ENSG00000169021.5	0.369	0.261273
ENSG00000130600.14	0.369	0.261375
ENSG00000167965.16	0.3689	0.261397
ENSG00000140682.17	0.3689	0.261483
ENSG00000199666.2	-0.3686	0.262642
ENSG00000167792.10	0.3686	0.262874
ENSG00000132541.9	0.3684	0.262878
ENSG00000149932.15	0.3684	0.262911
ENSG00000143314.11	0.3685	0.262935
ENSG00000134489.6	-0.3685	0.263224
ENSG00000025772.7	0.3682	0.263761
ENSG00000261685.2	0.3682	0.263924
ENSG00000168734.12	0.3681	0.263928
ENSG00000179010.13	0.368	0.264481
ENSG00000255606.1	0.3678	0.265181
ENSG00000167748.9	0.3677	0.2652
ENSG00000105677.10	0.3677	0.265293
ENSG00000166896.6	0.3678	0.265382
ENSG00000198003.10	0.3676	0.265649
ENSG00000106013.11	0.3675	0.265794
ENSG00000261643.1	0.3675	0.266069
ENSG00000253438.2	0.3674	0.266174
ENSG00000163239.11	0.3673	0.266269
ENSG00000148950.8	0.3672	0.266721
ENSG00000268581.1	-0.3671	0.267219
ENSG00000137714.2	0.3671	0.267438
ENSG00000273107.1	0.3657	0.267618
ENSG00000272047.1	0.3656	0.267757
ENSG00000278389.1	0.3657	0.267781
ENSG00000005022.5	0.3657	0.267799
ENSG00000252947.1	-0.3658	0.267892
ENSG00000166394.13	0.3656	0.267917
ENSG00000135404.10	0.3658	0.268159
ENSG00000138653.8	-0.3659	0.268185
ENSG00000211800.3	-0.366	0.268239
ENSG00000279160.1	-0.3658	0.268244
ENSG00000169738.6	0.3661	0.268288
ENSG00000137080.4	-0.3659	0.268324
ENSG00000267280.4	0.3661	0.268372
ENSG00000124721.16	-0.3661	0.268419
ENSG00000175348.9	0.3667	0.268424
ENSG00000273423.1	-0.3652	0.268446
ENSG00000182809.9	0.366	0.268466
ENSG00000254872.3	0.366	0.268492
ENSG00000183978.7	0.3658	0.26852
ENSG00000200064.1	0.3652	0.268569
ENSG00000106113.17	0.3667	0.268583
ENSG00000223991.1	-0.3665	0.268615
ENSG00000137806.7	0.3661	0.268692
ENSG00000160113.5	0.3662	0.268769
ENSG00000143158.9	0.3666	0.268774
ENSG00000119862.11	0.3666	0.268791
ENSG00000105135.14	0.3652	0.268793
ENSG00000109919.8	0.3668	0.268815
ENSG00000167815.10	0.3665	0.268858
ENSG00000154258.15	0.3667	0.268868
ENSG00000128311.12	0.3662	0.268925
ENSG00000159650.7	-0.3649	0.268939
ENSG00000105583.8	0.3663	0.268943
ENSG00000213925.3	-0.3664	0.268976
ENSG00000196183.5	-0.3649	0.268976
ENSG00000240889.1	0.365	0.268985
ENSG00000138107.10	0.3662	0.269002
ENSG00000180875.4	0.3653	0.269046
ENSG00000183111.10	0.3664	0.269061
ENSG00000090266.11	0.3652	0.269078
ENSG00000267505.1	0.3663	0.269088
ENSG00000088832.13	0.3667	0.269096
ENSG00000131080.13	0.3652	0.26911
ENSG00000114383.8	0.3653	0.269149
ENSG00000175573.6	0.3652	0.26922
ENSG00000130182.6	-0.365	0.269253
ENSG00000163364.8	0.365	0.269365
ENSG00000052344.14	0.3646	0.269747
ENSG00000170290.3	0.3647	0.269769
ENSG00000144331.17	0.3646	0.269824
ENSG00000116183.9	0.3647	0.269931
ENSG00000149451.16	0.3645	0.27003
ENSG00000176978.12	0.3644	0.270188
ENSG00000186395.6	0.3645	0.270216
ENSG00000236170.1	-0.3644	0.270301
ENSG00000067829.17	0.3642	0.271128
ENSG00000281692.1	0.364	0.271548
ENSG00000141971.11	0.3636	0.271703
ENSG00000189343.7	-0.3638	0.271765
ENSG00000116120.9	0.364	0.271816
ENSG00000162456.8	-0.3637	0.271823
ENSG00000270765.4	0.3639	0.271871
ENSG00000267583.4	0.3639	0.271929
ENSG00000237007.4	-0.3637	0.271966
ENSG00000124635.8	-0.3638	0.271996
ENSG00000112473.15	0.3638	0.272023
ENSG00000113013.11	0.3637	0.272043
ENSG00000274238.1	0.364	0.272055
ENSG00000171433.10	0.3635	0.272124
ENSG00000254704.3	-0.3633	0.272203
ENSG00000176046.8	0.3635	0.272217
ENSG00000128463.11	0.3633	0.27227
ENSG00000177699.4	-0.3631	0.272299
ENSG00000140092.13	0.3631	0.272392
ENSG00000224958.4	0.3633	0.272445
ENSG00000136810.11	0.3634	0.272487
ENSG00000168096.13	0.3631	0.272515
ENSG00000163909.7	0.3634	0.27255
ENSG00000120896.12	0.3628	0.272617
ENSG00000168569.7	0.3631	0.272675
ENSG00000273841.3	0.3632	0.272854
ENSG00000233521.4	0.3628	0.272876
ENSG00000175202.3	0.3629	0.272975
ENSG00000243160.1	-0.3628	0.273069
ENSG00000141030.11	0.3629	0.273133
ENSG00000184160.7	0.3626	0.273157
ENSG00000106028.9	0.3628	0.273188
ENSG00000159079.17	0.3628	0.273317
ENSG00000256164.1	0.3624	0.273661
ENSG00000251378.1	-0.3624	0.273692
ENSG00000169288.16	0.3625	0.273763
ENSG00000171314.8	0.3623	0.273796
ENSG00000257390.4	0.3625	0.273876
ENSG00000258826.4	-0.3624	0.273881
ENSG00000137809.15	0.3623	0.273962
ENSG00000187134.11	0.3622	0.274248
ENSG00000140905.8	0.3621	0.274329
ENSG00000228807.1	0.362	0.27461
ENSG00000100867.13	0.3616	0.275976
ENSG00000227051.5	0.3617	0.276034
ENSG00000250234.1	-0.3616	0.276146
ENSG00000169733.10	0.3617	0.276147
ENSG00000259134.4	0.3617	0.27628
ENSG00000111328.5	0.3617	0.276422
ENSG00000130725.6	0.3614	0.277209
ENSG00000184100.6	-0.3609	0.277441
ENSG00000103152.10	0.3613	0.27755
ENSG00000244389.3	-0.3613	0.27765
ENSG00000100294.11	0.3609	0.277709
ENSG00000231156.1	0.3609	0.27798
ENSG00000219438.7	0.361	0.278021
ENSG00000100889.10	0.361	0.27813
ENSG00000197595.3	-0.3594	0.278133
ENSG00000229421.1	0.3595	0.278239
ENSG00000053372.4	0.3608	0.278296
ENSG00000164485.13	-0.361	0.278378
ENSG00000177700.5	0.3595	0.278421
ENSG00000002330.12	0.361	0.278459
ENSG00000254418.1	-0.3607	0.278607
ENSG00000057593.12	0.3593	0.278608
ENSG00000250185.2	0.3586	0.27861
ENSG00000160191.16	0.361	0.278614
ENSG00000068438.13	0.3595	0.278684
ENSG00000170634.11	0.3607	0.278687
ENSG00000228106.4	0.3611	0.278801
ENSG00000244588.4	-0.3592	0.278805
ENSG00000003147.16	0.3586	0.278838
ENSG00000277573.1	0.3586	0.278856
ENSG00000120675.5	0.3606	0.278861
ENSG00000237949.1	0.3583	0.278891
ENSG00000170262.11	0.3582	0.278906
ENSG00000231748.1	0.3595	0.278934
ENSG00000077713.17	0.3583	0.278946
ENSG00000158882.11	0.3592	0.279001
ENSG00000183569.16	0.3605	0.279088
ENSG00000138744.13	0.3583	0.279101
ENSG00000149809.13	0.3595	0.279104
ENSG00000179008.7	0.3586	0.279107
ENSG00000242485.4	0.3604	0.27914
ENSG00000207491.1	-0.3604	0.279186
ENSG00000159231.5	0.3583	0.279187
ENSG00000256660.4	-0.3585	0.279199
ENSG00000204308.7	0.3596	0.279237
ENSG00000182180.12	0.3595	0.27926
ENSG00000163344.5	0.3591	0.279298
ENSG00000268650.3	0.3586	0.279366
ENSG00000165092.11	0.3584	0.279368
ENSG00000152154.9	0.3604	0.279412
ENSG00000171873.7	0.3584	0.279444
ENSG00000182154.7	0.3591	0.279457
ENSG00000169727.11	0.3588	0.279476
ENSG00000230539.1	-0.3591	0.27948
ENSG00000277386.1	0.3589	0.279486
ENSG00000133265.9	0.3596	0.279503
ENSG00000160688.17	0.3587	0.279523
ENSG00000271392.1	0.3587	0.279576
ENSG00000082515.15	0.3584	0.279587
ENSG00000149761.7	0.3588	0.279612
ENSG00000243069.6	0.3589	0.279638
ENSG00000124429.16	0.3587	0.279642
ENSG00000075142.12	0.3588	0.279647
ENSG00000183779.6	0.3589	0.279672
ENSG00000102878.14	0.3596	0.27969
ENSG00000089225.18	0.359	0.279763
ENSG00000219626.7	0.36	0.279763
ENSG00000164172.17	0.3603	0.279802
ENSG00000122033.13	0.3596	0.279887
ENSG00000227467.3	0.36	0.280011
ENSG00000204323.5	0.3601	0.280073
ENSG00000167754.11	0.36	0.280084
ENSG00000234224.2	0.3602	0.280087
ENSG00000214087.7	0.3596	0.280115
ENSG00000183346.6	0.3601	0.280147
ENSG00000114547.8	0.3579	0.28025
ENSG00000101938.13	0.3579	0.280282
ENSG00000253426.4	0.3596	0.280376
ENSG00000184436.10	0.3601	0.280396
ENSG00000070915.8	-0.358	0.280407
ENSG00000112651.10	0.3599	0.280489
ENSG00000178235.7	-0.3578	0.280518
ENSG00000139209.14	0.3578	0.280524
ENSG00000174564.11	0.3596	0.280569
ENSG00000105379.8	0.358	0.280656
ENSG00000167272.9	0.3597	0.280817
ENSG00000261295.1	0.3596	0.280838
ENSG00000184022.3	-0.3596	0.280984
ENSG00000168350.7	0.3597	0.281078
ENSG00000213104.3	-0.3597	0.281127
ENSG00000273866.1	0.3574	0.28113
ENSG00000198938.2	0.3596	0.281207
ENSG00000099194.5	-0.3574	0.28125
ENSG00000279575.1	-0.3574	0.281251
ENSG00000232675.6	0.3576	0.281282
ENSG00000124780.12	0.3574	0.281501
ENSG00000068120.13	0.3575	0.281583
ENSG00000253187.2	-0.3575	0.281593
ENSG00000106244.11	0.3575	0.28166
ENSG00000197798.7	0.3571	0.281878
ENSG00000004142.10	0.3575	0.281916
ENSG00000150403.16	0.3572	0.28194
ENSG00000237346.1	-0.3571	0.282043
ENSG00000211826.1	-0.3571	0.282139
ENSG00000165775.16	0.3571	0.282204
ENSG00000060971.16	0.3572	0.28224
ENSG00000250992.1	-0.3564	0.282386
ENSG00000253535.4	-0.3564	0.28253
ENSG00000241837.5	0.3564	0.282715
ENSG00000067221.12	0.3566	0.282842
ENSG00000173409.12	0.3567	0.28291
ENSG00000110011.12	0.3566	0.282915
ENSG00000270885.1	0.3566	0.282919
ENSG00000099795.5	0.3564	0.282967
ENSG00000142552.6	0.3565	0.282993
ENSG00000173638.17	0.3565	0.282994
ENSG00000278504.1	-0.3563	0.283049
ENSG00000091640.6	0.3567	0.283163
ENSG00000237451.3	0.3568	0.283183
ENSG00000175334.6	0.3562	0.283243
ENSG00000253577.1	-0.3567	0.283258
ENSG00000170043.10	0.3568	0.283306
ENSG00000224085.3	-0.3568	0.283418
ENSG00000168803.13	0.3551	0.28344
ENSG00000168917.8	0.3567	0.283491
ENSG00000210196.2	0.3552	0.283519
ENSG00000142513.5	0.3554	0.283579
ENSG00000254939.1	-0.3554	0.283585
ENSG00000230461.7	0.3555	0.283607
ENSG00000113249.11	-0.3552	0.283644
ENSG00000182165.16	0.3551	0.283646
ENSG00000164713.8	0.3551	0.283665
ENSG00000115286.18	0.3554	0.28371
ENSG00000131495.7	0.3552	0.283711
ENSG00000168894.8	0.355	0.283748
ENSG00000100138.12	0.3555	0.283766
ENSG00000163453.10	0.3552	0.283792
ENSG00000143543.13	0.3553	0.283819
ENSG00000172115.7	0.3556	0.283823
ENSG00000088002.10	0.3555	0.283826
ENSG00000167862.8	0.3561	0.283869
ENSG00000174446.11	0.3553	0.283909
ENSG00000215553.3	0.3544	0.283987
ENSG00000120053.10	0.3547	0.28404
ENSG00000104969.8	0.3556	0.284072
ENSG00000175550.6	0.3547	0.284088
ENSG00000244486.6	0.3544	0.284126
ENSG00000254560.4	-0.3545	0.284149
ENSG00000166136.14	0.3559	0.284152
ENSG00000116667.11	0.3558	0.284201
ENSG00000076706.13	0.3546	0.284211
ENSG00000118418.13	0.3543	0.284229
ENSG00000271858.4	0.3556	0.284235
ENSG00000224881.1	0.3558	0.284255
ENSG00000214376.5	0.3556	0.284258
ENSG00000206734.1	-0.3547	0.28427
ENSG00000149646.11	0.3557	0.284271
ENSG00000108179.12	0.3547	0.284283
ENSG00000126254.10	0.3549	0.284283
ENSG00000155957.15	0.354	0.284291
ENSG00000249599.1	0.3546	0.284294
ENSG00000161714.10	0.3538	0.28433
ENSG00000114993.14	0.3544	0.284336
ENSG00000158109.13	0.3548	0.284356
ENSG00000074800.12	0.3544	0.284359
ENSG00000075415.11	0.3548	0.284381
ENSG00000205138.3	0.3538	0.284388
ENSG00000102312.19	0.3559	0.284395
ENSG00000142910.14	0.3559	0.284402
ENSG00000263751.1	-0.3545	0.284405
ENSG00000105171.8	0.3549	0.284411
ENSG00000153823.17	0.3557	0.284431
ENSG00000235646.1	-0.3558	0.284433
ENSG00000180172.6	-0.3539	0.284434
ENSG00000255159.1	0.3556	0.284456
ENSG00000279595.1	-0.356	0.284465
ENSG00000179564.3	0.3557	0.284477
ENSG00000156709.12	0.356	0.284497
ENSG00000008018.8	0.354	0.284531
ENSG00000117480.14	0.3548	0.284587
ENSG00000099330.7	0.3539	0.284667
ENSG00000184232.7	0.354	0.284764
ENSG00000040731.9	0.3539	0.284781
ENSG00000064961.17	0.3542	0.284879
ENSG00000139508.13	0.3539	0.284899
ENSG00000259264.4	-0.3542	0.284909
ENSG00000125878.5	0.354	0.284939
ENSG00000109519.11	0.354	0.284994
ENSG00000008323.14	0.3541	0.285157
ENSG00000164096.12	0.3541	0.285296
ENSG00000125611.14	0.3535	0.285545
ENSG00000125971.15	0.3536	0.285661
ENSG00000165202.3	-0.3535	0.285666
ENSG00000179772.7	0.3535	0.285782
ENSG00000197180.2	0.3536	0.285816
ENSG00000273271.1	0.3534	0.285841
ENSG00000005075.14	0.3532	0.285944
ENSG00000276845.1	0.3529	0.285963
ENSG00000108479.10	0.3531	0.285997
ENSG00000241990.4	0.3531	0.286097
ENSG00000236078.1	0.353	0.286147
ENSG00000178537.8	0.3532	0.286149
ENSG00000229558.2	0.3529	0.28616
ENSG00000216921.6	0.353	0.286228
ENSG00000107130.8	0.3529	0.286245
ENSG00000173457.9	0.3531	0.286276
ENSG00000168890.12	0.3532	0.286386
ENSG00000268496.1	-0.3532	0.286412
ENSG00000261239.5	-0.3533	0.286477
ENSG00000127540.10	0.3532	0.286586
ENSG00000216365.2	0.3528	0.286704
ENSG00000148408.11	0.3516	0.286761
ENSG00000035141.6	0.3527	0.286782
ENSG00000185813.9	0.3516	0.286816
ENSG00000274523.3	0.3515	0.286965
ENSG00000222219.1	0.3516	0.286985
ENSG00000211918.1	-0.3527	0.286999
ENSG00000157020.16	0.3515	0.287014
ENSG00000197965.10	0.3516	0.287057
ENSG00000135940.5	0.3517	0.287068
ENSG00000179031.8	-0.3526	0.287251
ENSG00000072952.17	0.3517	0.287254
ENSG00000105655.17	0.3525	0.287278
ENSG00000224523.1	-0.3525	0.28732
ENSG00000250771.2	-0.3524	0.287394
ENSG00000274712.1	-0.3525	0.287402
ENSG00000111341.8	0.3514	0.287421
ENSG00000103266.9	0.3525	0.287431
ENSG00000156427.7	0.3517	0.287434
ENSG00000196465.9	0.3513	0.287472
ENSG00000228314.1	-0.3514	0.287479
ENSG00000234513.1	-0.3512	0.287517
ENSG00000273650.1	0.3524	0.287535
ENSG00000213873.4	-0.3513	0.287555
ENSG00000186501.13	0.3517	0.287612
ENSG00000236278.2	-0.3513	0.287612
ENSG00000182533.6	0.3523	0.287615
ENSG00000104976.10	0.3522	0.28762
ENSG00000101977.18	0.3512	0.287658
ENSG00000233392.4	-0.3518	0.287697
ENSG00000255090.4	0.3519	0.287712
ENSG00000010219.12	0.3523	0.28778
ENSG00000132622.9	0.3522	0.287783
ENSG00000178741.10	0.3517	0.287843
ENSG00000147955.15	0.352	0.2879
ENSG00000186439.11	0.3518	0.2879
ENSG00000198542.12	0.3522	0.287907
ENSG00000249464.4	0.352	0.287911
ENSG00000118402.5	0.352	0.287915
ENSG00000267013.4	0.3519	0.287918
ENSG00000204866.7	-0.3517	0.287974
ENSG00000188010.11	0.3521	0.288013
ENSG00000242019.1	-0.3521	0.288023
ENSG00000141385.8	0.3518	0.288028
ENSG00000243621.1	0.3517	0.288053
ENSG00000251580.1	0.3511	0.28809
ENSG00000105258.7	0.3519	0.288093
ENSG00000092295.10	0.351	0.288336
ENSG00000074416.12	0.351	0.288413
ENSG00000170270.4	0.3506	0.288803
ENSG00000227589.1	-0.3506	0.289005
ENSG00000181924.6	0.3506	0.289115
ENSG00000158417.9	0.3505	0.28924
ENSG00000182512.4	0.3507	0.289304
ENSG00000255508.6	0.3507	0.289419
ENSG00000167969.11	0.3507	0.289499
ENSG00000146701.10	0.3495	0.289523
ENSG00000203985.9	0.3507	0.289558
ENSG00000170370.11	0.3508	0.289583
ENSG00000183527.10	0.3502	0.289653
ENSG00000084623.10	0.3504	0.289659
ENSG00000165996.12	0.3496	0.289677
ENSG00000205426.9	0.3496	0.289735
ENSG00000100075.8	0.3495	0.289745
ENSG00000175985.9	0.3496	0.28976
ENSG00000273212.1	0.3507	0.289767
ENSG00000262151.1	-0.3497	0.289793
ENSG00000243154.1	-0.3503	0.289796
ENSG00000266472.4	0.3499	0.289797
ENSG00000118004.16	0.3504	0.289803
ENSG00000172005.9	0.3494	0.289811
ENSG00000130724.7	0.3502	0.289846
ENSG00000119705.8	0.3503	0.289859
ENSG00000165637.12	0.3499	0.289864
ENSG00000167985.5	0.3503	0.289872
ENSG00000175193.11	0.3504	0.289893
ENSG00000262636.1	-0.3501	0.289909
ENSG00000264663.1	-0.35	0.289924
ENSG00000246705.4	0.3495	0.289929
ENSG00000235482.1	0.3499	0.289944
ENSG00000116221.14	0.3496	0.289983
ENSG00000275592.1	-0.35	0.289985
ENSG00000166681.12	0.3497	0.289991
ENSG00000229294.1	0.35	0.290018
ENSG00000164967.8	0.3501	0.290054
ENSG00000206538.6	0.3502	0.290067
ENSG00000168314.16	0.3492	0.290098
ENSG00000132612.15	0.3495	0.290151
ENSG00000260046.1	-0.3497	0.290183
ENSG00000150787.6	0.3498	0.290189
ENSG00000218582.2	-0.35	0.290199
ENSG00000157782.8	0.3492	0.290209
ENSG00000163959.8	0.3497	0.290209
ENSG00000237833.1	-0.3493	0.290235
ENSG00000267390.1	0.3492	0.290256
ENSG00000279170.1	0.3498	0.290301
ENSG00000141552.16	0.3492	0.29039
ENSG00000257564.1	-0.3493	0.2904
ENSG00000171160.16	0.3493	0.290468
ENSG00000177706.8	0.349	0.291044
ENSG00000126247.9	0.3489	0.291482
ENSG00000229278.1	0.3489	0.291629
ENSG00000117410.12	0.3486	0.29214
ENSG00000239697.9	0.3485	0.292212
ENSG00000206583.1	-0.3487	0.29222
ENSG00000106330.10	0.3485	0.292284
ENSG00000275901.1	-0.3486	0.292311
ENSG00000252684.1	0.3486	0.292456
ENSG00000236583.1	0.3486	0.292474
ENSG00000167770.10	0.3487	0.292545
ENSG00000266258.1	0.3483	0.293329
ENSG00000181061.12	0.3483	0.293428
ENSG00000171311.11	0.3483	0.293461
ENSG00000111319.11	0.3482	0.293467
ENSG00000244094.1	-0.3481	0.29416
ENSG00000215311.3	-0.348	0.29482
ENSG00000235453.6	0.3479	0.295081
ENSG00000213213.12	0.3479	0.295188
ENSG00000138663.7	0.3478	0.295765
ENSG00000241313.2	0.3477	0.296009
ENSG00000212389.1	0.3476	0.296101
ENSG00000164120.12	-0.3476	0.296472
ENSG00000104964.13	0.3475	0.297037
ENSG00000198723.9	0.3474	0.297305
ENSG00000170801.8	0.3474	0.297486
ENSG00000213399.3	-0.347	0.299796
ENSG00000164070.10	0.347	0.299804
ENSG00000123395.13	0.3467	0.300427
ENSG00000198719.8	0.3467	0.300498
ENSG00000273885.1	-0.3468	0.300499
ENSG00000184281.13	0.3468	0.300606
ENSG00000090534.16	0.3465	0.300608
ENSG00000107404.16	0.3467	0.300647
ENSG00000198258.9	0.3466	0.300655
ENSG00000138085.15	0.3466	0.300658
ENSG00000198873.11	0.3466	0.300661
ENSG00000113732.7	0.3465	0.300667
ENSG00000159720.10	0.346	0.30071
ENSG00000168101.13	0.3465	0.300744
ENSG00000187094.10	0.3468	0.300799
ENSG00000226742.3	0.346	0.300817
ENSG00000106605.9	0.3464	0.300861
ENSG00000027847.12	0.3463	0.300872
ENSG00000023734.9	0.3463	0.300876
ENSG00000273253.2	0.3464	0.300912
ENSG00000205318.5	-0.3463	0.300951
ENSG00000205981.5	0.346	0.300998
ENSG00000278535.3	0.3457	0.301093
ENSG00000159186.4	0.346	0.301155
ENSG00000166979.11	0.3457	0.30116
ENSG00000089693.9	0.3459	0.301206
ENSG00000165891.14	-0.3462	0.301221
ENSG00000252636.1	-0.3457	0.301244
ENSG00000187513.8	0.346	0.301252
ENSG00000089009.14	0.3461	0.30138
ENSG00000135547.7	0.346	0.301434
ENSG00000157379.12	0.3458	0.301438
ENSG00000275356.2	-0.3457	0.30145
ENSG00000255435.5	0.3456	0.301458
ENSG00000279528.1	0.3461	0.30151
ENSG00000214160.8	0.346	0.301581
ENSG00000113734.16	0.3457	0.301592
ENSG00000179085.7	0.3461	0.30161
ENSG00000246430.5	0.346	0.301617
ENSG00000243066.3	-0.3455	0.301948
ENSG00000083444.15	0.3455	0.302161
ENSG00000141696.11	0.3453	0.303308
ENSG00000236075.1	-0.3451	0.303718
ENSG00000185924.6	0.3452	0.303725
ENSG00000260219.2	0.3449	0.303762
ENSG00000187140.5	0.3451	0.303773
ENSG00000184925.10	0.3449	0.303792
ENSG00000137507.10	0.345	0.303807
ENSG00000111481.8	0.345	0.303815
ENSG00000167515.9	0.345	0.303823
ENSG00000248521.1	0.3449	0.303829
ENSG00000215567.5	-0.3452	0.303917
ENSG00000228007.1	-0.3451	0.303934
ENSG00000112514.14	0.3448	0.304093
ENSG00000223392.1	-0.3448	0.304116
ENSG00000189046.9	0.3446	0.304288
ENSG00000090581.8	0.3445	0.304385
ENSG00000099804.7	0.3445	0.304395
ENSG00000205846.3	-0.3445	0.30448
ENSG00000250208.5	0.3446	0.304502
ENSG00000253552.6	0.3446	0.30454
ENSG00000177374.11	0.3444	0.304564
ENSG00000204446.4	0.3443	0.304594
ENSG00000082397.14	0.3445	0.304603
ENSG00000173267.12	0.3444	0.30462
ENSG00000166813.13	0.3443	0.304656
ENSG00000254959.5	0.3444	0.304733
ENSG00000078549.13	0.3447	0.304737
ENSG00000274331.1	0.3442	0.30475
ENSG00000094963.12	0.3446	0.304753
ENSG00000253714.1	-0.3443	0.304784
ENSG00000187051.7	0.3442	0.304933
ENSG00000267673.5	0.3441	0.305081
ENSG00000231359.3	0.3441	0.305188
ENSG00000277740.1	-0.344	0.305237
ENSG00000188124.2	0.3441	0.305284
ENSG00000236641.1	0.3438	0.306026
ENSG00000223764.2	0.3438	0.30605
ENSG00000177370.4	0.3438	0.306124
ENSG00000112695.10	0.3439	0.306139
ENSG00000241562.2	-0.3432	0.306297
ENSG00000230099.2	-0.3432	0.306443
ENSG00000199565.1	0.3436	0.306454
ENSG00000178952.7	0.3435	0.306517
ENSG00000182077.9	0.3436	0.306556
ENSG00000163541.10	0.3432	0.306613
ENSG00000170430.9	0.3432	0.306627
ENSG00000188856.6	-0.3435	0.306638
ENSG00000235091.1	-0.3435	0.306655
ENSG00000213363.4	-0.3435	0.306658
ENSG00000267106.4	0.3436	0.306664
ENSG00000204033.8	-0.3436	0.306701
ENSG00000203778.6	0.3437	0.306718
ENSG00000186479.4	0.3434	0.306806
ENSG00000144867.10	0.3434	0.306807
ENSG00000114902.12	0.3432	0.306826
ENSG00000242314.1	-0.3433	0.306879
ENSG00000260259.1	0.3433	0.306891
ENSG00000228474.4	0.3433	0.307013
ENSG00000237164.1	-0.343	0.307119
ENSG00000253982.1	0.343	0.307276
ENSG00000165548.9	0.3429	0.307503
ENSG00000172399.5	0.3429	0.307545
ENSG00000255397.1	-0.3429	0.30767
ENSG00000007520.3	0.3428	0.308114
ENSG00000240480.1	-0.3426	0.308304
ENSG00000277810.1	-0.3427	0.308309
ENSG00000241644.2	0.3427	0.308373
ENSG00000113312.9	0.3427	0.308386
ENSG00000127838.12	0.3426	0.308405
ENSG00000271789.1	0.3425	0.308772
ENSG00000105366.14	-0.3425	0.308808
ENSG00000172301.9	0.3423	0.308992
ENSG00000264016.2	0.3424	0.309085
ENSG00000171703.15	0.3423	0.309204
ENSG00000201861.1	-0.3424	0.309236
ENSG00000242173.7	0.3424	0.309282
ENSG00000268649.3	0.3422	0.309814
ENSG00000111775.2	0.3419	0.310275
ENSG00000223572.8	0.3419	0.310336
ENSG00000178602.6	0.342	0.310374
ENSG00000250377.1	0.3419	0.310416
ENSG00000237987.1	0.342	0.310417
ENSG00000106992.16	0.3419	0.310448
ENSG00000232293.2	-0.3419	0.310565
ENSG00000130349.8	0.3417	0.310592
ENSG00000155115.6	0.342	0.310609
ENSG00000160408.13	0.3417	0.310613
ENSG00000183955.11	0.3415	0.310707
ENSG00000168701.17	0.3418	0.310749
ENSG00000170955.9	0.342	0.310783
ENSG00000271952.1	-0.3417	0.310796
ENSG00000196998.14	0.3416	0.310861
ENSG00000136770.9	0.3415	0.310917
ENSG00000231069.1	0.3415	0.311055
ENSG00000255198.4	0.3416	0.311065
ENSG00000254755.1	-0.3416	0.311085
ENSG00000100811.9	0.3413	0.311644
ENSG00000257495.4	-0.3414	0.311673
ENSG00000136444.8	0.3413	0.311894
ENSG00000181038.12	0.3412	0.311953
ENSG00000126259.18	-0.3412	0.312177
ENSG00000077463.13	0.3411	0.3122
ENSG00000120306.8	0.3411	0.312223
ENSG00000279204.1	0.3411	0.312389
ENSG00000178033.5	0.3407	0.312437
ENSG00000255622.3	0.341	0.312541
ENSG00000264920.1	0.3407	0.312643
ENSG00000249772.1	-0.3408	0.312734
ENSG00000176340.3	0.3407	0.312742
ENSG00000099385.10	0.341	0.312744
ENSG00000103024.6	0.3409	0.312841
ENSG00000102309.11	0.3409	0.31286
ENSG00000011009.9	0.3408	0.312867
ENSG00000232655.1	-0.3407	0.312887
ENSG00000101940.16	0.3407	0.31293
ENSG00000261645.4	0.3408	0.313022
ENSG00000122390.16	0.3407	0.3131
ENSG00000162951.9	0.3406	0.313108
ENSG00000134533.5	0.3408	0.313206
ENSG00000221926.10	0.3405	0.31329
ENSG00000172789.3	0.3404	0.313366
ENSG00000255163.1	-0.3404	0.313486
ENSG00000164161.8	0.3402	0.313757
ENSG00000129084.16	0.3402	0.313822
ENSG00000170473.15	0.3401	0.313868
ENSG00000112214.9	0.3402	0.313903
ENSG00000130307.10	0.3398	0.313912
ENSG00000226329.2	0.3402	0.313912
ENSG00000189227.5	0.3397	0.313949
ENSG00000135924.14	0.3401	0.313961
ENSG00000263312.1	0.3397	0.313989
ENSG00000179918.16	0.3398	0.314007
ENSG00000225851.1	-0.3402	0.314061
ENSG00000273013.1	0.3396	0.314111
ENSG00000215845.9	0.3398	0.314132
ENSG00000187013.4	0.3403	0.314162
ENSG00000108641.13	0.3402	0.31417
ENSG00000277873.1	0.3398	0.314187
ENSG00000183520.10	0.3403	0.314222
ENSG00000143786.6	0.3397	0.314241
ENSG00000111832.11	0.3398	0.314266
ENSG00000222346.1	-0.3395	0.314275
ENSG00000131055.4	0.3396	0.314278
ENSG00000265688.1	0.3399	0.314366
ENSG00000230424.1	0.3399	0.314369
ENSG00000227217.1	-0.34	0.314417
ENSG00000257530.1	0.3399	0.314429
ENSG00000234438.3	0.3396	0.31447
ENSG00000129535.11	0.3399	0.314593
ENSG00000119227.6	0.3396	0.314652
ENSG00000177025.3	0.3399	0.314713
ENSG00000117448.12	0.3394	0.314769
ENSG00000250107.1	0.3394	0.314898
ENSG00000228131.1	-0.3393	0.314998
ENSG00000140740.9	0.3392	0.315707
ENSG00000265971.1	0.3391	0.316096
ENSG00000100097.10	0.3391	0.316236
ENSG00000273604.1	-0.339	0.316361
ENSG00000200998.1	0.3389	0.316403
ENSG00000109794.12	0.339	0.316403
ENSG00000143196.4	0.3389	0.316421
ENSG00000116096.5	0.339	0.316495
ENSG00000165794.8	0.339	0.316617
ENSG00000266389.1	-0.3388	0.316847
ENSG00000184916.7	0.3388	0.3169
ENSG00000123179.12	0.3386	0.317778
ENSG00000183580.9	0.3386	0.318232
ENSG00000160209.17	0.3384	0.318528
ENSG00000163689.17	-0.3383	0.31864
ENSG00000142507.8	0.3384	0.318733
ENSG00000167283.6	0.3383	0.318789
ENSG00000205693.3	-0.3384	0.318887
ENSG00000214046.7	0.3384	0.318899
ENSG00000164008.12	0.3384	0.318911
ENSG00000164181.12	0.3382	0.319233
ENSG00000230175.1	0.3382	0.319268
ENSG00000263427.1	-0.3377	0.319595
ENSG00000121900.17	0.338	0.319648
ENSG00000163288.12	0.338	0.319796
ENSG00000231092.1	-0.3377	0.319799
ENSG00000203950.6	0.338	0.319824
ENSG00000149294.15	0.3381	0.319835
ENSG00000181396.11	0.3378	0.319921
ENSG00000224807.5	0.3377	0.319925
ENSG00000196262.12	0.3379	0.319979
ENSG00000119650.11	0.3379	0.320046
ENSG00000222017.1	-0.3379	0.320076
ENSG00000213563.5	0.3378	0.320085
ENSG00000110801.12	0.3379	0.320105
ENSG00000180532.9	0.3372	0.32012
ENSG00000271581.1	-0.3372	0.32015
ENSG00000260908.1	-0.3371	0.320152
ENSG00000132170.18	0.3373	0.320206
ENSG00000126603.7	0.3372	0.320238
ENSG00000272626.1	-0.3372	0.320286
ENSG00000106077.17	0.3378	0.32029
ENSG00000125817.7	0.3371	0.320397
ENSG00000100106.18	0.3373	0.320409
ENSG00000279859.1	0.3378	0.320452
ENSG00000167695.13	0.3376	0.320467
ENSG00000232556.1	-0.3373	0.320515
ENSG00000207836.1	-0.337	0.320547
ENSG00000231916.1	0.3375	0.320625
ENSG00000224400.4	0.3375	0.32067
ENSG00000204334.7	0.337	0.320673
ENSG00000222257.1	-0.3373	0.320718
ENSG00000254511.1	0.337	0.320718
ENSG00000182175.12	0.3375	0.320722
ENSG00000174547.12	0.3366	0.320729
ENSG00000197859.8	0.3367	0.320757
ENSG00000153037.11	0.3367	0.320784
ENSG00000225521.1	0.3374	0.320812
ENSG00000267360.5	0.3366	0.320814
ENSG00000234019.1	0.3373	0.320865
ENSG00000157150.4	0.3368	0.320875
ENSG00000067113.15	0.3368	0.320885
ENSG00000269667.1	-0.3366	0.320895
ENSG00000161920.8	0.3374	0.320901
ENSG00000254038.1	-0.3367	0.320908
ENSG00000259099.2	-0.3368	0.320933
ENSG00000183258.10	0.3373	0.320986
ENSG00000186198.3	0.3369	0.321064
ENSG00000267321.1	0.3369	0.321065
ENSG00000128294.14	0.3366	0.321091
ENSG00000117791.14	0.3368	0.321092
ENSG00000215246.5	0.3365	0.321122
ENSG00000124678.16	-0.3368	0.321172
ENSG00000186162.9	0.3365	0.321177
ENSG00000158864.11	0.3373	0.321189
ENSG00000188643.9	0.3365	0.321221
ENSG00000233387.1	-0.3373	0.321249
ENSG00000125879.4	0.3362	0.321888
ENSG00000148834.11	0.3362	0.322004
ENSG00000196132.10	0.336	0.322102
ENSG00000203993.4	0.3361	0.322113
ENSG00000129559.11	0.3362	0.322164
ENSG00000109854.12	0.3363	0.322225
ENSG00000188191.13	0.3362	0.322255
ENSG00000237115.2	0.3362	0.322283
ENSG00000183207.11	0.3363	0.322299
ENSG00000130385.5	-0.336	0.322299
ENSG00000173915.11	0.336	0.322305
ENSG00000281522.1	-0.336	0.322308
ENSG00000123178.13	0.3362	0.322407
ENSG00000177830.16	0.3358	0.323189
ENSG00000083807.8	0.3358	0.323459
ENSG00000249383.1	-0.3357	0.323503
ENSG00000182902.12	0.3357	0.323592
ENSG00000257261.4	0.3356	0.324036
ENSG00000272823.1	0.3355	0.324218
ENSG00000123119.10	0.3355	0.324308
ENSG00000226068.1	-0.3355	0.324415
ENSG00000089199.8	-0.3353	0.324444
ENSG00000189171.12	0.3353	0.324565
ENSG00000183172.8	0.3353	0.324599
ENSG00000105650.20	0.3352	0.324674
ENSG00000004059.9	0.3353	0.324763
ENSG00000140395.7	0.3354	0.324925
ENSG00000202347.1	-0.3353	0.324934
ENSG00000253971.1	-0.3354	0.325073
ENSG00000042088.12	-0.3351	0.325339
ENSG00000226348.1	0.3351	0.325462
ENSG00000234006.1	0.3351	0.325528
ENSG00000137210.12	0.335	0.325532
ENSG00000228586.1	0.335	0.32565
ENSG00000049283.16	0.335	0.325845
ENSG00000128185.8	0.3349	0.326078
ENSG00000239789.4	0.3348	0.326352
ENSG00000204568.10	0.3348	0.326391
ENSG00000135972.7	0.3347	0.32698
ENSG00000137462.6	-0.3346	0.327056
ENSG00000049323.14	0.3346	0.327096
ENSG00000179958.7	0.3346	0.327097
ENSG00000165688.10	0.3345	0.327133
ENSG00000172586.7	0.3345	0.327173
ENSG00000127125.8	0.3346	0.327216
ENSG00000177469.12	0.3344	0.327922
ENSG00000171658.7	0.3343	0.328393
ENSG00000271911.1	0.3342	0.328497
ENSG00000068489.11	-0.3342	0.328632
ENSG00000214883.4	-0.3336	0.328757
ENSG00000131966.12	0.3341	0.32883
ENSG00000238644.1	-0.3334	0.328857
ENSG00000261377.4	0.3334	0.328907
ENSG00000198933.8	0.3336	0.32893
ENSG00000259052.1	0.3334	0.328952
ENSG00000232527.6	0.3341	0.328973
ENSG00000136463.7	0.3336	0.328973
ENSG00000272288.4	0.3341	0.328988
ENSG00000175161.12	0.3341	0.328988
ENSG00000070610.13	0.334	0.328989
ENSG00000131050.9	0.3333	0.329034
ENSG00000196951.9	0.3333	0.329037
ENSG00000233554.4	0.3333	0.32904
ENSG00000151360.8	0.334	0.329052
ENSG00000269974.1	-0.3336	0.329057
ENSG00000118162.12	0.3334	0.329062
ENSG00000112837.15	0.3339	0.32907
ENSG00000268423.3	0.3332	0.329072
ENSG00000085871.7	0.334	0.329107
ENSG00000143850.11	0.3336	0.329123
ENSG00000156411.8	0.3332	0.329126
ENSG00000271287.1	-0.3332	0.329206
ENSG00000226963.1	-0.3334	0.329224
ENSG00000125995.14	0.3339	0.329228
ENSG00000147488.10	-0.3332	0.329236
ENSG00000117395.9	0.3336	0.32928
ENSG00000171953.14	0.3339	0.329307
ENSG00000266107.1	0.3335	0.329401
ENSG00000227582.2	0.3334	0.329413
ENSG00000244731.6	-0.3324	0.329429
ENSG00000132975.7	0.3325	0.329473
ENSG00000116212.13	0.3336	0.329476
ENSG00000273443.1	-0.3337	0.329575
ENSG00000128564.6	-0.3329	0.329651
ENSG00000183747.10	0.3325	0.32966
ENSG00000127507.16	-0.3338	0.329666
ENSG00000214253.7	0.3337	0.329671
ENSG00000232054.1	-0.3325	0.329707
ENSG00000141295.12	0.3329	0.329718
ENSG00000238113.5	0.3325	0.329721
ENSG00000184523.3	0.3325	0.329725
ENSG00000255737.2	0.3326	0.329734
ENSG00000102178.11	0.3338	0.329745
ENSG00000090273.12	0.3329	0.329762
ENSG00000238431.1	-0.3325	0.329797
ENSG00000131100.11	0.3337	0.329828
ENSG00000184220.9	0.3327	0.32984
ENSG00000223597.2	-0.3326	0.329869
ENSG00000128595.15	0.3328	0.329894
ENSG00000127884.4	0.3329	0.329911
ENSG00000254208.1	0.3337	0.329927
ENSG00000259032.2	-0.3337	0.329964
ENSG00000250626.2	0.333	0.329964
ENSG00000229494.1	-0.3325	0.329989
ENSG00000271584.1	0.3327	0.329994
ENSG00000253506.2	-0.3328	0.330009
ENSG00000262185.1	0.3327	0.330018
ENSG00000256053.6	0.3326	0.330093
ENSG00000101365.19	0.3329	0.330105
ENSG00000243635.1	-0.3329	0.330107
ENSG00000228792.2	0.3327	0.330118
ENSG00000257210.1	-0.3327	0.330133
ENSG00000108826.14	0.333	0.330172
ENSG00000198995.2	-0.333	0.330244
ENSG00000198888.2	0.3329	0.330255
ENSG00000262703.1	-0.3319	0.330386
ENSG00000162236.10	0.3319	0.33041
ENSG00000242291.1	-0.3323	0.33044
ENSG00000278642.1	0.3319	0.3305
ENSG00000061455.10	0.3319	0.330522
ENSG00000105220.13	0.3318	0.330552
ENSG00000233456.1	-0.3322	0.330553
ENSG00000136193.15	0.3323	0.330621
ENSG00000130294.13	0.3319	0.330632
ENSG00000170515.12	0.3319	0.330743
ENSG00000196655.8	0.3321	0.330746
ENSG00000173163.9	0.332	0.330753
ENSG00000106610.13	0.3322	0.330798
ENSG00000071655.16	0.3319	0.330933
ENSG00000103591.11	0.3321	0.330937
ENSG00000253978.1	0.3317	0.330976
ENSG00000149196.14	0.3321	0.331043
ENSG00000123415.13	0.3321	0.331049
ENSG00000213051.3	-0.3317	0.331097
ENSG00000188037.9	0.332	0.33111
ENSG00000207982.1	0.332	0.331135
ENSG00000115828.14	-0.3317	0.331169
ENSG00000116685.14	0.3315	0.331409
ENSG00000238120.1	0.3316	0.331413
ENSG00000174576.7	0.3315	0.331487
ENSG00000187037.7	-0.3316	0.331487
ENSG00000178381.10	0.3316	0.331582
ENSG00000278126.1	0.3315	0.331737
ENSG00000074527.10	0.3314	0.331784
ENSG00000234055.1	-0.3314	0.332044
ENSG00000255627.1	-0.3313	0.332114
ENSG00000203724.9	0.3313	0.332208
ENSG00000201608.1	-0.3312	0.333043
ENSG00000176909.10	0.331	0.333109
ENSG00000166295.7	0.331	0.333135
ENSG00000105559.10	0.331	0.333324
ENSG00000183807.7	0.3311	0.333388
ENSG00000156467.8	0.3311	0.333415
ENSG00000172663.7	0.331	0.333474
ENSG00000037241.6	0.3309	0.333752
ENSG00000259091.1	0.3306	0.3339
ENSG00000100373.8	0.3306	0.333946
ENSG00000188266.12	0.3308	0.333962
ENSG00000274961.1	-0.3308	0.333984
ENSG00000265203.1	0.3307	0.334009
ENSG00000201242.1	-0.3306	0.334014
ENSG00000142186.15	0.3308	0.334048
ENSG00000173113.5	0.3308	0.334098
ENSG00000183979.7	0.3307	0.334122
ENSG00000245080.5	-0.3307	0.334153
ENSG00000145247.10	0.3307	0.334198
ENSG00000198816.5	0.3304	0.334475
ENSG00000112667.11	0.3305	0.334591
ENSG00000154328.14	0.3304	0.334663
ENSG00000106367.12	0.3304	0.3348
ENSG00000095906.15	0.3304	0.334812
ENSG00000275569.1	0.33	0.335012
ENSG00000197858.9	0.3301	0.335081
ENSG00000143222.10	0.33	0.335094
ENSG00000255517.5	0.3301	0.335168
ENSG00000235661.2	0.3298	0.335176
ENSG00000130520.9	0.3301	0.335268
ENSG00000243519.1	-0.3302	0.335273
ENSG00000234142.1	-0.3299	0.335299
ENSG00000130762.13	0.3302	0.3353
ENSG00000106537.7	0.3301	0.335312
ENSG00000201749.1	-0.3303	0.335322
ENSG00000099260.9	0.3296	0.335341
ENSG00000139405.14	0.3303	0.335363
ENSG00000169976.6	0.3296	0.335368
ENSG00000136931.8	-0.3302	0.335401
ENSG00000159398.14	-0.3296	0.335425
ENSG00000168291.11	0.3299	0.335447
ENSG00000100387.8	0.3301	0.335455
ENSG00000156509.12	-0.3296	0.335475
ENSG00000100605.15	0.3293	0.335485
ENSG00000105669.11	0.3302	0.335488
ENSG00000140450.8	0.3297	0.335525
ENSG00000234758.1	-0.3295	0.335533
ENSG00000198131.12	0.3299	0.335594
ENSG00000148848.13	-0.3296	0.335595
ENSG00000263655.1	-0.3297	0.335607
ENSG00000105676.12	0.3293	0.33563
ENSG00000100417.10	0.3299	0.335702
ENSG00000086504.14	0.3297	0.335711
ENSG00000158292.6	0.3297	0.335739
ENSG00000114767.6	0.3297	0.335765
ENSG00000176692.5	0.3293	0.335778
ENSG00000131116.10	0.3295	0.335794
ENSG00000215712.9	0.3299	0.335848
ENSG00000243915.1	-0.3293	0.33587
ENSG00000233380.1	-0.3299	0.33591
ENSG00000232445.1	0.3294	0.335982
ENSG00000152669.8	0.3294	0.336007
ENSG00000255151.2	-0.3293	0.336015
ENSG00000265936.1	-0.3294	0.336114
ENSG00000105404.9	0.3292	0.336256
ENSG00000255092.1	-0.3294	0.336268
ENSG00000159377.9	0.3291	0.336311
ENSG00000252855.1	0.329	0.336412
ENSG00000172889.14	0.3291	0.336476
ENSG00000234703.1	-0.3289	0.33648
ENSG00000134375.9	0.3291	0.336501
ENSG00000148482.10	-0.329	0.336556
ENSG00000196566.2	-0.329	0.336559
ENSG00000164081.11	0.3291	0.336605
ENSG00000106803.8	0.329	0.336641
ENSG00000270170.1	0.3289	0.336745
ENSG00000239705.1	0.3289	0.336809
ENSG00000174744.12	0.3286	0.337462
ENSG00000145912.7	0.3287	0.337509
ENSG00000125356.6	0.3287	0.337565
ENSG00000162520.13	0.3287	0.337576
ENSG00000163468.13	0.3287	0.337637
ENSG00000135914.5	0.3285	0.337827
ENSG00000271784.1	0.3285	0.337849
ENSG00000147813.14	0.3286	0.337917
ENSG00000275158.1	-0.3285	0.337965
ENSG00000224959.1	0.3285	0.337973
ENSG00000120860.9	0.3284	0.338216
ENSG00000264107.1	0.3284	0.338324
ENSG00000100220.10	0.3282	0.339513
ENSG00000250846.5	0.3281	0.340018
ENSG00000269993.1	-0.328	0.340635
ENSG00000260157.3	0.328	0.340819
ENSG00000148291.8	0.3279	0.341027
ENSG00000145476.14	0.3279	0.341085
ENSG00000129910.6	0.3277	0.34153
ENSG00000111339.9	0.3278	0.341602
ENSG00000271201.1	-0.3278	0.341759
ENSG00000155367.14	0.3273	0.34203
ENSG00000213722.7	0.3271	0.342041
ENSG00000229646.2	-0.327	0.342045
ENSG00000228624.6	0.3276	0.342056
ENSG00000167363.12	0.3272	0.342163
ENSG00000170619.9	0.3273	0.342168
ENSG00000188992.10	0.3272	0.342183
ENSG00000198840.2	0.3276	0.342201
ENSG00000167671.10	0.327	0.342218
ENSG00000154274.13	0.327	0.342286
ENSG00000148082.8	0.3271	0.342305
ENSG00000278453.1	-0.3272	0.342329
ENSG00000054803.3	0.3269	0.34235
ENSG00000129562.9	0.3273	0.342351
ENSG00000204370.7	0.3271	0.342402
ENSG00000181991.14	0.3269	0.34242
ENSG00000269293.2	0.327	0.342421
ENSG00000213672.6	0.3273	0.342455
ENSG00000182676.4	0.3275	0.342482
ENSG00000177225.15	0.3272	0.342489
ENSG00000237076.1	0.327	0.342499
ENSG00000186806.5	0.3276	0.34253
ENSG00000162591.14	0.3275	0.342549
ENSG00000204455.7	0.3273	0.342574
ENSG00000259246.3	-0.3275	0.34258
ENSG00000248719.1	-0.327	0.342598
ENSG00000243661.1	-0.3275	0.342681
ENSG00000168952.14	0.3268	0.342701
ENSG00000253686.1	-0.3273	0.34272
ENSG00000223675.1	0.3273	0.342722
ENSG00000111666.9	0.3273	0.342783
ENSG00000261866.1	-0.3274	0.34288
ENSG00000164896.18	0.3273	0.342927
ENSG00000197448.12	0.3267	0.342943
ENSG00000231054.1	0.3267	0.343016
ENSG00000226193.1	0.3266	0.343046
ENSG00000104883.6	0.3273	0.343071
ENSG00000201616.1	0.3267	0.343083
ENSG00000185651.13	0.3267	0.343085
ENSG00000202310.1	-0.3266	0.3432
ENSG00000259459.4	0.3266	0.343246
ENSG00000129810.13	-0.3264	0.343388
ENSG00000230782.1	0.3261	0.343392
ENSG00000254821.1	0.3264	0.343433
ENSG00000146540.13	0.326	0.34352
ENSG00000167617.2	0.326	0.343531
ENSG00000170469.9	0.3262	0.343539
ENSG00000189398.5	-0.326	0.343541
ENSG00000185837.3	0.3261	0.343592
ENSG00000214113.9	0.3264	0.343613
ENSG00000164047.4	0.3262	0.343635
ENSG00000002919.13	0.3261	0.343637
ENSG00000254287.1	-0.326	0.343676
ENSG00000135324.5	0.3262	0.343695
ENSG00000184669.7	0.3263	0.343716
ENSG00000260701.1	0.3263	0.343746
ENSG00000213069.3	-0.3263	0.343777
ENSG00000105467.7	0.3263	0.343785
ENSG00000204060.5	0.3262	0.343791
ENSG00000168936.9	0.3264	0.343794
ENSG00000265246.1	0.3265	0.343887
ENSG00000200897.1	0.3265	0.343922
ENSG00000225963.6	-0.3263	0.343925
ENSG00000233204.1	0.3262	0.343927
ENSG00000148343.17	0.3257	0.343974
ENSG00000139637.12	0.3262	0.344067
ENSG00000123353.8	0.3258	0.344067
ENSG00000124733.3	0.3257	0.344152
ENSG00000174080.9	0.3259	0.344193
ENSG00000241369.4	-0.3258	0.344231
ENSG00000232858.1	-0.3257	0.344231
ENSG00000235169.6	0.3259	0.344262
ENSG00000260431.2	0.3258	0.344301
ENSG00000167244.16	0.3258	0.344382
ENSG00000149600.10	0.3256	0.344764
ENSG00000171759.7	0.3256	0.345045
ENSG00000215177.3	-0.3254	0.345734
ENSG00000179832.16	0.3254	0.345747
ENSG00000101331.14	0.3254	0.345828
ENSG00000227848.1	0.3253	0.346104
ENSG00000157766.14	0.3252	0.346585
ENSG00000101150.16	0.3252	0.346605
ENSG00000197353.3	0.3252	0.346672
ENSG00000131355.13	-0.3252	0.346718
ENSG00000123405.12	0.3251	0.346991
ENSG00000166143.8	0.3251	0.347
ENSG00000184182.17	0.325	0.347157
ENSG00000183463.5	-0.3249	0.347658
ENSG00000163701.17	0.3249	0.347814
ENSG00000100412.14	0.3247	0.348133
ENSG00000100243.19	0.3248	0.348163
ENSG00000147123.10	0.3247	0.348199
ENSG00000205763.12	0.3247	0.348199
ENSG00000172061.8	0.3247	0.348246
ENSG00000129214.13	0.3247	0.348255
ENSG00000211912.1	-0.3248	0.348284
ENSG00000177674.14	0.3248	0.348293
ENSG00000243056.1	0.3248	0.348319
ENSG00000116353.14	0.3245	0.348683
ENSG00000161055.3	0.3246	0.348812
ENSG00000179222.16	0.3245	0.348819
ENSG00000241035.2	0.3245	0.348931
ENSG00000101546.11	0.3245	0.348951
ENSG00000260896.4	-0.3244	0.349321
ENSG00000163001.10	0.3242	0.349661
ENSG00000102317.16	0.3243	0.349705
ENSG00000175756.12	0.3242	0.349727
ENSG00000271380.1	0.3243	0.349735
ENSG00000244310.1	-0.3243	0.349785
ENSG00000150459.11	0.3242	0.349839
ENSG00000271334.4	0.324	0.349884
ENSG00000115541.9	0.3241	0.349928
ENSG00000232916.1	-0.3241	0.349957
ENSG00000169248.11	-0.3241	0.349963
ENSG00000084674.12	0.3241	0.349965
ENSG00000127252.5	0.324	0.350011
ENSG00000136159.3	0.324	0.350063
ENSG00000198523.5	0.3236	0.350064
ENSG00000242860.3	0.324	0.350103
ENSG00000140612.12	0.3236	0.350129
ENSG00000129250.10	0.3237	0.350168
ENSG00000261832.3	0.3237	0.35018
ENSG00000168374.9	0.3236	0.350197
ENSG00000165644.9	0.3238	0.350198
ENSG00000179933.5	0.3237	0.350237
ENSG00000140365.14	0.3237	0.350251
ENSG00000211816.2	-0.3238	0.350271
ENSG00000214321.3	-0.3238	0.350281
ENSG00000187778.12	0.3238	0.350358
ENSG00000172403.9	0.3237	0.350385
ENSG00000200629.1	-0.3236	0.350414
ENSG00000236834.1	-0.3235	0.350423
ENSG00000100121.11	0.3239	0.350467
ENSG00000241293.1	-0.3238	0.350523
ENSG00000263989.2	0.3235	0.350536
ENSG00000108784.8	0.3239	0.350577
ENSG00000197785.12	0.3238	0.350672
ENSG00000207932.1	-0.3233	0.350873
ENSG00000188655.9	0.3234	0.350921
ENSG00000149357.8	0.3234	0.350992
ENSG00000234337.4	-0.3233	0.351019
ENSG00000280434.1	-0.3234	0.351028
[truncated: 50,732 more rows]
