# Supplementary material for: Transcriptomic Characteristics Associated With Aging in the Thyroid Gland
Source: Front Nutr. 2022 May 25;9:859702. doi: 10.3389/fnut.2022.859702 (PMC9174607; doi:10.3389/fnut.2022.859702)
Supplement: Supplementary file 2 [file Table_2.XLSX]

## Sheet: Supplementary Table 2
Supplementary Table 2. Complete list of Spearman rank correlations between gene expression and age group in GTEx samples (n=604)
Ensembl ID	Rho	FDR
ENSG00000244694.7	0.4718	4.53736e-30
ENSG00000130513.6	0.4302	3.60692e-24
ENSG00000163071.10	0.3932	1.65525e-19
ENSG00000183317.16	0.3905	2.64291e-19
ENSG00000270640.1	0.3791	4.80273e-18
ENSG00000172409.5	-0.3706	3.77752e-17
ENSG00000225950.8	0.3685	5.63862e-17
ENSG00000174173.6	-0.3644	1.42639e-16
ENSG00000138231.12	-0.3636	1.53508e-16
ENSG00000182810.6	-0.3623	1.93777e-16
ENSG00000101138.11	-0.3597	4.92345e-16
ENSG00000133561.15	-0.3556	8.332e-16
ENSG00000178163.7	-0.3559	9.02633e-16
ENSG00000166189.7	-0.3502	2.7079e-15
ENSG00000059804.15	0.3494	3.24948e-15
ENSG00000234546.3	0.3477	4.40034e-15
ENSG00000198841.3	-0.3461	6.05295e-15
ENSG00000212916.4	-0.344	9.62809e-15
ENSG00000196411.9	-0.3435	1.02615e-14
ENSG00000131043.11	-0.3432	1.029e-14
ENSG00000172667.10	0.343	1.03158e-14
ENSG00000280173.1	-0.3408	1.53448e-14
ENSG00000205869.2	0.3411	1.55089e-14
ENSG00000124217.4	-0.3406	1.55975e-14
ENSG00000269356.1	0.3408	1.60119e-14
ENSG00000163564.14	0.3402	1.64557e-14
ENSG00000259494.1	-0.3381	2.60761e-14
ENSG00000168806.7	-0.3368	3.38488e-14
ENSG00000198963.10	0.3361	3.80974e-14
ENSG00000167447.12	-0.3345	5.34359e-14
ENSG00000188536.12	0.331	1.06675e-13
ENSG00000179967.11	0.3313	1.06918e-13
ENSG00000262870.1	0.3311	1.09501e-13
ENSG00000135925.8	0.3284	1.8796e-13
ENSG00000204388.6	0.328	2.01622e-13
ENSG00000180884.9	-0.3246	4.16565e-13
ENSG00000189369.8	-0.3243	4.34435e-13
ENSG00000196890.4	0.3233	5.17636e-13
ENSG00000116679.15	0.3203	9.91091e-13
ENSG00000196767.6	0.3197	1.08682e-12
ENSG00000102878.16	0.3195	1.10562e-12
ENSG00000180543.4	-0.3194	1.1114e-12
ENSG00000134107.4	0.319	1.19009e-12
ENSG00000178773.14	0.3166	1.92999e-12
ENSG00000196290.14	-0.3163	2.03189e-12
ENSG00000237973.1	-0.3156	2.24064e-12
ENSG00000159167.11	0.3156	2.3262e-12
ENSG00000116128.10	-0.3147	2.67462e-12
ENSG00000269376.1	0.3139	3.07971e-12
ENSG00000274026.1	0.3132	3.5415e-12
ENSG00000279766.1	0.3128	3.59333e-12
ENSG00000155876.5	-0.313	3.63793e-12
ENSG00000203814.6	0.3128	3.68587e-12
ENSG00000244734.3	0.3124	3.79411e-12
ENSG00000162377.5	-0.3123	3.84831e-12
ENSG00000273203.1	0.3122	3.85244e-12
ENSG00000175283.7	-0.3124	3.88664e-12
ENSG00000158050.4	0.312	3.90787e-12
ENSG00000241112.1	0.3118	4.00916e-12
ENSG00000166860.2	-0.3093	6.72543e-12
ENSG00000103253.17	0.3086	7.66487e-12
ENSG00000112319.17	0.3081	8.39108e-12
ENSG00000235079.1	-0.3077	8.89481e-12
ENSG00000229808.1	0.3076	8.95706e-12
ENSG00000117069.14	0.3075	9.03564e-12
ENSG00000177981.10	-0.3058	1.24567e-11
ENSG00000196337.11	0.3051	1.44227e-11
ENSG00000206172.8	0.3043	1.62921e-11
ENSG00000170468.7	-0.3043	1.65707e-11
ENSG00000177688.6	0.3038	1.79418e-11
ENSG00000101955.14	-0.3036	1.8352e-11
ENSG00000187566.5	-0.3033	1.90028e-11
ENSG00000176907.4	0.3033	1.91364e-11
ENSG00000234389.1	0.3027	2.0982e-11
ENSG00000064703.11	-0.3026	2.1472e-11
ENSG00000185614.4	-0.3022	2.28447e-11
ENSG00000198804.2	-0.3021	2.31917e-11
ENSG00000124762.13	0.3019	2.35076e-11
ENSG00000200879.1	0.3018	2.38164e-11
ENSG00000198492.15	-0.3015	2.47587e-11
ENSG00000259663.2	0.3013	2.51075e-11
ENSG00000232931.5	0.3014	2.52541e-11
ENSG00000177822.7	0.3013	2.53223e-11
ENSG00000081041.8	0.3	3.25638e-11
ENSG00000035499.12	0.2997	3.39271e-11
ENSG00000132357.13	-0.2994	3.53123e-11
ENSG00000203879.11	0.2993	3.55352e-11
ENSG00000215251.3	-0.2993	3.55414e-11
ENSG00000233930.3	0.2988	3.8002e-11
ENSG00000155367.15	0.2988	3.80111e-11
ENSG00000166856.2	-0.2989	3.83614e-11
ENSG00000236426.5	0.2986	3.89372e-11
ENSG00000275029.1	0.2977	4.65029e-11
ENSG00000275092.1	0.2971	5.19136e-11
ENSG00000087074.7	0.2969	5.27698e-11
ENSG00000213923.11	0.2969	5.29646e-11
ENSG00000123444.13	-0.2961	6.08666e-11
ENSG00000272812.1	0.2957	6.48202e-11
ENSG00000130772.13	-0.295	7.38503e-11
ENSG00000162004.16	0.295	7.4253e-11
ENSG00000235070.3	-0.2944	8.22907e-11
ENSG00000266412.5	-0.2941	8.5055e-11
ENSG00000226396.1	0.2941	8.65161e-11
ENSG00000258469.1	0.294	8.65521e-11
ENSG00000262902.1	-0.2929	1.05262e-10
ENSG00000241472.6	0.2922	1.18118e-10
ENSG00000142102.15	0.2922	1.19517e-10
ENSG00000138696.10	0.2919	1.24878e-10
ENSG00000278881.2	0.2914	1.3726e-10
ENSG00000271862.1	-0.2912	1.4152e-10
ENSG00000248483.6	0.291	1.46096e-10
ENSG00000273284.1	0.2905	1.58203e-10
ENSG00000228107.1	0.2901	1.69307e-10
ENSG00000131080.14	0.2896	1.8523e-10
ENSG00000119927.13	-0.2894	1.91516e-10
ENSG00000125484.11	-0.289	2.0389e-10
ENSG00000165660.7	-0.2889	2.05463e-10
ENSG00000026103.21	0.289	2.05533e-10
ENSG00000185088.13	0.2885	2.18643e-10
ENSG00000184378.2	-0.2883	2.2274e-10
ENSG00000167767.13	0.2884	2.2341e-10
ENSG00000231312.6	0.2881	2.32291e-10
ENSG00000197329.11	0.2879	2.37022e-10
ENSG00000254272.1	0.2878	2.37041e-10
ENSG00000213809.8	0.2879	2.38897e-10
ENSG00000231889.7	0.2878	2.39057e-10
ENSG00000162148.10	0.2878	2.39858e-10
ENSG00000251034.1	-0.2872	2.60462e-10
ENSG00000251596.1	0.2871	2.65195e-10
ENSG00000100298.15	0.2869	2.72091e-10
ENSG00000279821.1	0.2867	2.7839e-10
ENSG00000151117.8	-0.2867	2.80224e-10
ENSG00000143786.7	0.2867	2.80685e-10
ENSG00000124688.13	-0.2867	2.82752e-10
ENSG00000151376.16	0.2862	3.02053e-10
ENSG00000260807.6	0.2859	3.15858e-10
ENSG00000108448.20	-0.2859	3.18678e-10
ENSG00000183569.17	0.2858	3.19621e-10
ENSG00000178502.5	-0.2856	3.25853e-10
ENSG00000197037.10	-0.2853	3.47243e-10
ENSG00000260060.1	-0.2852	3.48491e-10
ENSG00000280206.1	0.2845	3.93519e-10
ENSG00000142765.17	0.2843	4.0879e-10
ENSG00000203896.9	0.284	4.26595e-10
ENSG00000183137.14	0.2839	4.27736e-10
ENSG00000173715.15	0.2839	4.28118e-10
ENSG00000078725.12	0.2839	4.31762e-10
ENSG00000261578.1	-0.2837	4.32668e-10
ENSG00000146109.4	-0.2839	4.33176e-10
ENSG00000152154.10	0.2837	4.34404e-10
ENSG00000116819.6	0.2837	4.38033e-10
ENSG00000235631.1	0.2835	4.44468e-10
ENSG00000167081.16	0.2834	4.5051e-10
ENSG00000131779.10	-0.2829	4.90332e-10
ENSG00000006652.13	0.2826	5.20472e-10
ENSG00000242435.1	0.2825	5.26788e-10
ENSG00000214021.15	0.2824	5.30002e-10
ENSG00000153237.17	0.2821	5.61671e-10
ENSG00000147454.13	0.282	5.67642e-10
ENSG00000277224.2	0.2817	5.97789e-10
ENSG00000111537.4	0.2816	6.06764e-10
ENSG00000114491.13	-0.2815	6.06866e-10
ENSG00000107443.15	-0.2815	6.14068e-10
ENSG00000139567.12	-0.2814	6.20742e-10
ENSG00000213999.15	0.2812	6.37302e-10
ENSG00000177303.9	-0.2811	6.38068e-10
ENSG00000139631.18	0.2811	6.47641e-10
ENSG00000278986.1	-0.2809	6.55224e-10
ENSG00000270091.1	-0.2809	6.57016e-10
ENSG00000165197.4	-0.2807	6.73703e-10
ENSG00000163013.11	0.2807	6.78272e-10
ENSG00000100650.15	0.2805	6.99809e-10
ENSG00000173110.7	0.2802	7.24312e-10
ENSG00000165802.21	0.28	7.53012e-10
ENSG00000166133.17	-0.28	7.53865e-10
ENSG00000179593.15	0.2798	7.72556e-10
ENSG00000128191.15	-0.2797	7.79841e-10
ENSG00000169231.13	0.2797	7.80663e-10
ENSG00000239218.2	0.2796	7.82504e-10
ENSG00000211694.2	0.279	8.80087e-10
ENSG00000186352.8	0.2789	8.86458e-10
ENSG00000231721.6	0.2786	9.27114e-10
ENSG00000113194.12	-0.2785	9.47546e-10
ENSG00000100142.14	0.2783	9.69339e-10
ENSG00000104356.10	-0.2783	9.78174e-10
ENSG00000270587.1	-0.2781	1.00067e-09
ENSG00000275993.2	0.2777	1.0729e-09
ENSG00000103966.10	-0.2777	1.07383e-09
ENSG00000186704.9	0.2772	1.15871e-09
ENSG00000119328.11	0.2772	1.1671e-09
ENSG00000257596.1	0.2771	1.17091e-09
ENSG00000159147.17	0.2771	1.17413e-09
ENSG00000268287.1	0.277	1.19308e-09
ENSG00000198824.5	-0.2765	1.28166e-09
ENSG00000172890.11	0.2764	1.29132e-09
ENSG00000126456.15	0.2765	1.29394e-09
ENSG00000168496.3	-0.2762	1.33729e-09
ENSG00000010072.15	-0.2758	1.44351e-09
ENSG00000269978.1	0.2756	1.48112e-09
ENSG00000163739.4	0.2755	1.48415e-09
ENSG00000236047.1	0.2756	1.49211e-09
ENSG00000182841.12	0.2755	1.49897e-09
ENSG00000177096.8	-0.2749	1.66839e-09
ENSG00000198954.7	-0.2745	1.7545e-09
ENSG00000121966.6	0.2745	1.75906e-09
ENSG00000269971.1	0.2744	1.79213e-09
ENSG00000186130.4	-0.2744	1.79723e-09
ENSG00000170191.4	-0.2743	1.81179e-09
ENSG00000213693.4	-0.274	1.87661e-09
ENSG00000181143.15	0.274	1.90813e-09
ENSG00000188483.7	0.2737	1.98954e-09
ENSG00000197921.5	0.2735	2.01614e-09
ENSG00000183696.13	0.2735	2.02913e-09
ENSG00000132467.3	-0.2735	2.05558e-09
ENSG00000150991.14	0.2732	2.11517e-09
ENSG00000272620.1	0.2728	2.24932e-09
ENSG00000225880.5	0.2728	2.29784e-09
ENSG00000179144.4	-0.2726	2.32553e-09
ENSG00000055163.19	0.2726	2.34653e-09
ENSG00000185112.5	-0.2724	2.41315e-09
ENSG00000106305.9	-0.2723	2.45083e-09
ENSG00000261596.2	0.2721	2.50231e-09
ENSG00000188833.9	0.2721	2.5214e-09
ENSG00000210151.2	-0.2717	2.66523e-09
ENSG00000275560.1	0.2716	2.68065e-09
ENSG00000274340.1	-0.2716	2.69316e-09
ENSG00000228446.2	0.2716	2.70314e-09
ENSG00000133742.13	0.2716	2.73879e-09
ENSG00000204086.4	0.2714	2.78004e-09
ENSG00000258967.1	0.2712	2.8766e-09
ENSG00000223528.7	0.271	2.92881e-09
ENSG00000241635.7	-0.271	2.93226e-09
ENSG00000237126.8	-0.2708	3.01513e-09
ENSG00000148926.9	0.2708	3.05007e-09
ENSG00000144821.9	0.2706	3.08009e-09
ENSG00000267121.5	0.2707	3.08306e-09
ENSG00000099804.8	0.2704	3.19081e-09
ENSG00000183688.4	-0.2701	3.34472e-09
ENSG00000016082.14	0.27	3.43085e-09
ENSG00000276533.1	0.2699	3.45105e-09
ENSG00000204311.12	0.2698	3.47505e-09
ENSG00000184254.16	0.2698	3.48899e-09
ENSG00000233695.2	0.2697	3.56455e-09
ENSG00000198431.15	-0.2696	3.58262e-09
ENSG00000073861.2	0.2694	3.66916e-09
ENSG00000166128.12	0.2694	3.70054e-09
ENSG00000155324.9	0.2692	3.76759e-09
ENSG00000119913.4	-0.2692	3.79464e-09
ENSG00000269906.1	0.2688	4.01086e-09
ENSG00000182791.4	-0.2688	4.04209e-09
ENSG00000182667.14	0.2687	4.09702e-09
ENSG00000278330.1	0.2682	4.41866e-09
ENSG00000204389.9	0.2681	4.48921e-09
ENSG00000175147.11	0.2679	4.64436e-09
ENSG00000158578.18	0.2678	4.72389e-09
ENSG00000132773.11	-0.2678	4.74075e-09
ENSG00000225975.6	0.2676	4.76889e-09
ENSG00000206177.6	0.2677	4.78409e-09
ENSG00000168038.10	0.2676	4.84074e-09
ENSG00000213398.7	0.2676	4.84344e-09
ENSG00000102786.14	0.2674	4.98602e-09
ENSG00000277632.1	0.2671	5.19348e-09
ENSG00000243175.1	0.2669	5.37052e-09
ENSG00000177757.2	-0.2668	5.41482e-09
ENSG00000179562.2	-0.2667	5.49125e-09
ENSG00000272341.1	0.2665	5.70797e-09
ENSG00000189114.6	-0.2664	5.75446e-09
ENSG00000075891.21	0.2663	5.8089e-09
ENSG00000132002.7	0.2661	5.99447e-09
ENSG00000147535.16	0.266	6.18408e-09
ENSG00000278828.1	0.2659	6.24276e-09
ENSG00000186603.5	-0.2659	6.24857e-09
ENSG00000105327.17	0.2658	6.2674e-09
ENSG00000163877.10	-0.2657	6.37181e-09
ENSG00000241057.2	0.2656	6.46307e-09
ENSG00000173209.22	0.2655	6.53781e-09
ENSG00000131634.13	-0.2653	6.76704e-09
ENSG00000238279.1	0.2651	6.95696e-09
ENSG00000255363.2	0.2651	6.97569e-09
ENSG00000106336.12	0.2648	7.29819e-09
ENSG00000203801.8	0.2645	7.60098e-09
ENSG00000223609.7	0.2645	7.63751e-09
ENSG00000090432.6	-0.2645	7.71493e-09
ENSG00000105376.4	0.2643	7.89767e-09
ENSG00000174327.6	-0.2642	7.97607e-09
ENSG00000264538.6	0.2642	7.97962e-09
ENSG00000115165.9	0.2639	8.3923e-09
ENSG00000170525.19	0.2638	8.39881e-09
ENSG00000178852.15	0.2638	8.43945e-09
ENSG00000233478.1	0.2637	8.47076e-09
ENSG00000197245.5	-0.2635	8.87514e-09
ENSG00000168268.10	-0.2634	8.93842e-09
ENSG00000241211.1	0.2631	9.45262e-09
ENSG00000227191.8	0.2629	9.56419e-09
ENSG00000068028.17	0.2629	9.63825e-09
ENSG00000239828.6	0.2627	9.84508e-09
ENSG00000129538.13	-0.2626	1.00023e-08
ENSG00000079999.13	-0.2627	1.00034e-08
ENSG00000163331.11	0.2626	1.0032e-08
ENSG00000243716.10	0.2623	1.04848e-08
ENSG00000237877.6	0.2623	1.05761e-08
ENSG00000113070.7	0.2621	1.07629e-08
ENSG00000232934.7	0.2621	1.08694e-08
ENSG00000267369.1	0.2619	1.11089e-08
ENSG00000160111.12	0.2619	1.11536e-08
ENSG00000154127.9	-0.2618	1.12349e-08
ENSG00000110628.13	0.2616	1.16308e-08
ENSG00000128052.8	-0.2615	1.17646e-08
ENSG00000259721.1	0.2614	1.19658e-08
ENSG00000189266.11	0.2614	1.19803e-08
ENSG00000157184.6	-0.2609	1.30148e-08
ENSG00000184545.10	0.2608	1.30163e-08
ENSG00000124126.13	-0.2607	1.31494e-08
ENSG00000278607.1	0.2608	1.31569e-08
ENSG00000228223.2	-0.2606	1.35201e-08
ENSG00000056558.10	0.2604	1.38407e-08
ENSG00000184599.13	0.2604	1.38489e-08
ENSG00000134830.5	-0.2601	1.43883e-08
ENSG00000163898.9	0.2601	1.44139e-08
ENSG00000113739.10	0.2601	1.45309e-08
ENSG00000196659.9	-0.26	1.46429e-08
ENSG00000234511.8	0.2599	1.47166e-08
ENSG00000013441.15	0.2599	1.47171e-08
ENSG00000276107.1	0.2598	1.48494e-08
ENSG00000163508.12	0.2598	1.49166e-08
ENSG00000233098.8	0.2598	1.49566e-08
ENSG00000143653.9	0.2598	1.49691e-08
ENSG00000147124.12	-0.2598	1.50369e-08
ENSG00000138166.5	0.2597	1.51162e-08
ENSG00000164296.6	-0.2594	1.57515e-08
ENSG00000100109.16	-0.2594	1.57767e-08
ENSG00000132274.15	0.2593	1.58712e-08
ENSG00000135749.18	0.2593	1.58888e-08
ENSG00000175161.13	0.2592	1.60441e-08
ENSG00000205560.12	0.2591	1.64401e-08
ENSG00000107951.14	-0.259	1.66708e-08
ENSG00000072818.11	0.2589	1.66776e-08
ENSG00000179348.11	-0.2588	1.75734e-08
ENSG00000177613.8	-0.2588	1.76254e-08
ENSG00000255201.1	0.2581	1.86752e-08
ENSG00000196405.12	0.2581	1.8729e-08
ENSG00000133624.13	0.2581	1.87831e-08
ENSG00000275611.1	0.2582	1.88376e-08
ENSG00000256340.8	0.2582	1.88923e-08
ENSG00000171428.13	-0.2582	1.89474e-08
ENSG00000116584.17	0.2582	1.90028e-08
ENSG00000102466.15	0.2582	1.90585e-08
ENSG00000238164.6	0.2583	1.91146e-08
ENSG00000260388.2	-0.2574	1.99449e-08
ENSG00000119929.12	-0.2574	2.00015e-08
ENSG00000121310.16	0.2575	2.00585e-08
ENSG00000073756.11	0.2575	2.01158e-08
ENSG00000147206.16	0.2579	2.01735e-08
ENSG00000229931.1	0.257	2.11201e-08
ENSG00000138031.14	-0.2571	2.11791e-08
ENSG00000128594.7	-0.2572	2.12384e-08
ENSG00000283122.1	0.2573	2.12981e-08
ENSG00000279519.1	-0.2573	2.13581e-08
ENSG00000273149.1	0.2573	2.14184e-08
ENSG00000128016.5	0.2566	2.22567e-08
ENSG00000189120.4	-0.2567	2.23179e-08
ENSG00000279838.1	-0.2568	2.23793e-08
ENSG00000137275.13	-0.2568	2.24412e-08
ENSG00000267703.1	0.2569	2.25033e-08
ENSG00000266010.1	0.2569	2.25658e-08
ENSG00000197852.9	-0.2562	2.32313e-08
ENSG00000155592.15	-0.2563	2.32938e-08
ENSG00000151006.7	0.2563	2.33565e-08
ENSG00000243836.5	0.2564	2.34197e-08
ENSG00000148219.16	0.2564	2.34831e-08
ENSG00000259924.1	0.2565	2.3547e-08
ENSG00000164855.15	0.2565	2.36111e-08
ENSG00000092929.11	0.2565	2.36756e-08
ENSG00000197557.6	-0.256	2.44863e-08
ENSG00000066926.10	-0.256	2.45516e-08
ENSG00000140379.7	0.2561	2.46173e-08
ENSG00000261428.2	-0.2556	2.56538e-08
ENSG00000159692.15	0.2556	2.57215e-08
ENSG00000122692.8	-0.2557	2.57895e-08
ENSG00000104267.9	0.2557	2.58579e-08
ENSG00000156853.12	-0.2552	2.65892e-08
ENSG00000275302.1	0.2554	2.66581e-08
ENSG00000273802.2	0.2554	2.67273e-08
ENSG00000106366.8	0.2554	2.67969e-08
ENSG00000256148.1	-0.2555	2.68669e-08
ENSG00000220848.4	0.2555	2.69372e-08
ENSG00000173535.13	0.2555	2.70079e-08
ENSG00000280077.1	0.255	2.78447e-08
ENSG00000280073.1	0.255	2.79165e-08
ENSG00000196455.7	-0.2548	2.9162e-08
ENSG00000138411.10	-0.2544	3.02405e-08
ENSG00000213089.4	0.2545	3.03175e-08
ENSG00000103196.11	-0.2545	3.03948e-08
ENSG00000224570.1	0.2546	3.04725e-08
ENSG00000141682.11	0.2541	3.14554e-08
ENSG00000148734.7	0.2542	3.1535e-08
ENSG00000275131.2	0.254	3.26581e-08
ENSG00000188636.3	-0.2541	3.27404e-08
ENSG00000205763.13	0.2538	3.39336e-08
ENSG00000138834.12	0.2535	3.51149e-08
ENSG00000154240.16	0.2536	3.52027e-08
ENSG00000158691.14	-0.2531	3.76284e-08
ENSG00000091732.15	-0.2531	3.7722e-08
ENSG00000152484.13	0.2528	3.87798e-08
ENSG00000120088.14	0.2529	3.88758e-08
ENSG00000196312.12	0.2526	3.98221e-08
ENSG00000117228.9	0.2526	3.99199e-08
ENSG00000034533.11	-0.2527	4.00182e-08
ENSG00000261438.1	0.2524	4.08491e-08
ENSG00000179256.2	0.2525	4.09487e-08
ENSG00000163666.8	0.2525	4.10489e-08
ENSG00000101977.19	0.2522	4.19626e-08
ENSG00000173227.13	0.2523	4.20645e-08
ENSG00000275894.1	0.2521	4.28588e-08
ENSG00000134884.13	0.2521	4.29619e-08
ENSG00000100450.12	0.2521	4.30654e-08
ENSG00000062716.12	0.2521	4.31694e-08
ENSG00000259583.2	0.2518	4.39468e-08
ENSG00000205307.11	0.2518	4.4052e-08
ENSG00000260966.1	-0.2518	4.51317e-08
ENSG00000251491.2	0.2515	4.60919e-08
ENSG00000186666.5	-0.2515	4.62011e-08
ENSG00000145979.17	0.2515	4.63109e-08
ENSG00000270040.1	0.2513	4.72605e-08
ENSG00000224986.2	0.2512	4.81968e-08
ENSG00000183542.5	0.2512	4.831e-08
ENSG00000279433.1	0.2513	4.84236e-08
ENSG00000175564.12	-0.251	4.92345e-08
ENSG00000183248.11	0.2511	4.93496e-08
ENSG00000178531.5	0.2509	5.03795e-08
ENSG00000227945.1	0.2508	5.12812e-08
ENSG00000162639.15	-0.2508	5.14e-08
ENSG00000149289.10	-0.2508	5.15192e-08
ENSG00000197586.12	0.2504	5.35355e-08
ENSG00000275713.2	0.2505	5.36588e-08
ENSG00000162702.7	-0.2503	5.46549e-08
ENSG00000173846.12	0.2502	5.5515e-08
ENSG00000141084.10	0.2502	5.56418e-08
ENSG00000132846.5	-0.2502	5.57691e-08
ENSG00000248309.7	0.2501	5.66197e-08
ENSG00000256723.1	-0.2499	5.75888e-08
ENSG00000240204.2	0.2499	5.77194e-08
ENSG00000270554.1	0.2497	5.86814e-08
ENSG00000181036.13	0.2495	6.07152e-08
ENSG00000279118.1	0.2496	6.08517e-08
ENSG00000169035.11	0.2496	6.09887e-08
ENSG00000167766.18	0.2494	6.1791e-08
ENSG00000156500.14	0.2493	6.2722e-08
ENSG00000268707.1	0.2494	6.2862e-08
ENSG00000180787.5	-0.2491	6.35038e-08
ENSG00000148399.12	0.2492	6.36447e-08
ENSG00000079931.14	0.2492	6.37861e-08
ENSG00000230916.2	-0.249	6.42754e-08
ENSG00000185122.10	0.249	6.4417e-08
ENSG00000001084.10	-0.2491	6.45592e-08
ENSG00000143774.16	0.2488	6.63643e-08
ENSG00000235831.6	0.2489	6.65098e-08
ENSG00000169413.2	-0.2488	6.74019e-08
ENSG00000237070.1	0.2486	6.8138e-08
ENSG00000215417.12	-0.2486	6.82862e-08
ENSG00000112365.4	-0.2486	6.84349e-08
ENSG00000258086.1	0.2485	6.87166e-08
ENSG00000237978.5	0.2485	6.88647e-08
ENSG00000216809.1	-0.2485	6.90134e-08
ENSG00000169418.9	-0.2485	6.91628e-08
ENSG00000104687.12	-0.2484	6.92853e-08
ENSG00000055483.19	0.2484	6.94333e-08
ENSG00000255026.1	0.2485	6.9582e-08
ENSG00000128917.6	0.2485	6.97313e-08
ENSG00000275919.1	0.2483	7.01409e-08
ENSG00000126803.9	-0.2483	7.02902e-08
ENSG00000126814.6	-0.2483	7.11397e-08
ENSG00000103056.11	0.2481	7.32793e-08
ENSG00000157150.4	-0.2479	7.54099e-08
ENSG00000214846.4	0.2478	7.63913e-08
ENSG00000260423.1	0.2476	7.72064e-08
ENSG00000179915.22	0.2477	7.73686e-08
ENSG00000187513.8	-0.2475	7.91453e-08
ENSG00000120889.12	0.2475	7.93109e-08
ENSG00000128254.12	0.2474	7.99422e-08
ENSG00000106278.11	0.2474	8.01087e-08
ENSG00000174197.16	-0.2473	8.08999e-08
ENSG00000196372.12	-0.2472	8.15162e-08
ENSG00000171659.13	-0.2472	8.16846e-08
ENSG00000125657.4	0.2472	8.18537e-08
ENSG00000213339.8	0.2471	8.22935e-08
ENSG00000100522.8	-0.2471	8.24628e-08
ENSG00000176845.12	0.247	8.41719e-08
ENSG00000068383.18	-0.247	8.43444e-08
ENSG00000213542.3	0.2469	8.51054e-08
ENSG00000213203.2	-0.2468	8.56861e-08
ENSG00000164086.9	-0.2468	8.58602e-08
ENSG00000121413.12	0.2468	8.60351e-08
ENSG00000187609.15	0.2468	8.66089e-08
ENSG00000153291.15	0.2467	8.75281e-08
ENSG00000222011.8	0.2466	8.84435e-08
ENSG00000125508.3	0.2465	8.93553e-08
ENSG00000177352.9	-0.2465	9.02633e-08
ENSG00000130935.9	-0.2464	9.09854e-08
ENSG00000110169.10	0.2464	9.11678e-08
ENSG00000269887.1	0.2463	9.18848e-08
ENSG00000269952.1	0.2462	9.25962e-08
ENSG00000187626.8	-0.2462	9.27806e-08
ENSG00000267082.1	0.246	9.65192e-08
ENSG00000250337.5	0.246	9.67107e-08
ENSG00000185115.5	-0.2459	9.73988e-08
ENSG00000244306.10	0.2458	9.78887e-08
ENSG00000226816.2	-0.2458	9.80814e-08
ENSG00000164949.7	0.2458	9.82749e-08
ENSG00000257298.1	0.2457	9.85654e-08
ENSG00000169429.10	0.2457	9.87587e-08
ENSG00000177993.3	-0.2457	9.92369e-08
ENSG00000109471.4	0.2457	9.94307e-08
ENSG00000168071.21	0.2456	1.00097e-07
ENSG00000119048.7	0.2455	1.01809e-07
ENSG00000109771.15	0.2455	1.02006e-07
ENSG00000100058.12	0.2454	1.02659e-07
ENSG00000138798.11	-0.2453	1.03307e-07
ENSG00000141040.14	-0.2454	1.03507e-07
ENSG00000177971.8	-0.2452	1.0499e-07
ENSG00000134152.10	0.2452	1.05191e-07
ENSG00000270061.1	0.2452	1.05826e-07
ENSG00000174943.9	0.2449	1.10801e-07
ENSG00000269967.1	0.2448	1.11623e-07
ENSG00000125895.5	0.2447	1.12442e-07
ENSG00000150048.10	0.2447	1.13258e-07
ENSG00000088826.17	0.2446	1.15099e-07
ENSG00000163319.10	-0.2445	1.15906e-07
ENSG00000237765.6	0.2445	1.16491e-07
ENSG00000147138.1	0.2445	1.16711e-07
ENSG00000164976.8	-0.2444	1.17291e-07
ENSG00000225871.2	0.2443	1.18089e-07
ENSG00000204642.13	0.244	1.24746e-07
ENSG00000184465.15	0.244	1.2498e-07
ENSG00000169877.9	0.2439	1.26537e-07
ENSG00000067601.7	0.2438	1.28322e-07
ENSG00000276672.1	-0.2438	1.29092e-07
ENSG00000164002.11	-0.2436	1.30622e-07
ENSG00000162511.7	-0.2437	1.30865e-07
ENSG00000145020.15	0.2436	1.32386e-07
ENSG00000262905.1	0.2435	1.32652e-07
ENSG00000228109.1	0.2435	1.32897e-07
ENSG00000198105.13	0.2435	1.33143e-07
ENSG00000250116.2	0.2435	1.33404e-07
ENSG00000102886.14	0.2432	1.39121e-07
ENSG00000105278.10	0.2431	1.39859e-07
ENSG00000247626.4	-0.2431	1.40081e-07
ENSG00000214093.3	0.2431	1.40336e-07
ENSG00000118503.14	0.2431	1.40593e-07
ENSG00000188305.5	-0.243	1.42521e-07
ENSG00000186594.14	-0.243	1.4278e-07
ENSG00000226287.8	0.2429	1.43244e-07
ENSG00000276115.1	0.2429	1.44944e-07
ENSG00000196110.7	-0.2428	1.4566e-07
ENSG00000225808.1	0.2428	1.46373e-07
ENSG00000168291.12	-0.2427	1.47084e-07
ENSG00000117616.17	0.2427	1.47792e-07
ENSG00000103472.9	0.2426	1.48232e-07
ENSG00000276564.1	0.2427	1.48498e-07
ENSG00000261351.2	0.2426	1.48935e-07
ENSG00000167780.11	0.2425	1.50332e-07
ENSG00000115523.16	0.2425	1.506e-07
ENSG00000183741.11	-0.2425	1.51027e-07
ENSG00000174579.3	-0.2424	1.51451e-07
ENSG00000115085.13	0.2424	1.51719e-07
ENSG00000231789.2	0.2424	1.51872e-07
ENSG00000223960.6	0.2424	1.5214e-07
ENSG00000163154.5	-0.2423	1.53511e-07
ENSG00000124380.10	0.2423	1.54193e-07
ENSG00000162772.16	0.2423	1.54873e-07
ENSG00000077150.18	0.2422	1.56499e-07
ENSG00000275888.1	0.2421	1.57172e-07
ENSG00000228526.6	0.2421	1.57843e-07
ENSG00000164877.18	0.2419	1.62285e-07
ENSG00000256673.1	0.2418	1.64829e-07
ENSG00000115419.12	0.2417	1.67363e-07
ENSG00000070495.14	0.2416	1.67721e-07
ENSG00000205730.6	-0.2417	1.68012e-07
ENSG00000267074.1	0.2416	1.69302e-07
ENSG00000268460.1	0.2415	1.70878e-07
ENSG00000124659.6	-0.2415	1.71221e-07
ENSG00000095370.19	-0.2415	1.71516e-07
ENSG00000104142.10	-0.2414	1.72785e-07
ENSG00000210194.1	-0.2413	1.74344e-07
ENSG00000169047.5	-0.2411	1.81452e-07
ENSG00000273151.1	0.241	1.82679e-07
ENSG00000004838.13	0.241	1.82991e-07
ENSG00000260704.1	-0.2409	1.84211e-07
ENSG00000023445.13	0.2409	1.84818e-07
ENSG00000244687.11	0.2408	1.8634e-07
ENSG00000225420.1	0.2408	1.87858e-07
ENSG00000198695.2	-0.2408	1.88137e-07
ENSG00000069493.14	0.2408	1.88455e-07
ENSG00000171649.11	-0.2407	1.88732e-07
ENSG00000087842.10	-0.2407	1.89325e-07
ENSG00000138614.14	-0.2406	1.91734e-07
ENSG00000279845.1	0.2405	1.95041e-07
ENSG00000249180.1	0.2404	1.96527e-07
ENSG00000124731.12	0.2404	1.97103e-07
ENSG00000163728.10	0.2403	2.00051e-07
ENSG00000019549.9	-0.2403	2.00385e-07
ENSG00000198910.12	0.2401	2.04437e-07
ENSG00000112782.15	0.2401	2.04777e-07
ENSG00000127957.17	0.2401	2.04995e-07
ENSG00000026559.13	0.2401	2.05117e-07
ENSG00000112511.17	0.24	2.06444e-07
ENSG00000273703.1	0.24	2.07888e-07
ENSG00000274290.2	0.24	2.08437e-07
ENSG00000234072.1	0.2399	2.09873e-07
ENSG00000157423.17	0.2398	2.12193e-07
ENSG00000196843.15	0.2398	2.13618e-07
ENSG00000159189.11	-0.2397	2.14154e-07
ENSG00000162415.6	-0.2396	2.17339e-07
ENSG00000130770.17	0.2395	2.20513e-07
ENSG00000135111.15	-0.2395	2.21035e-07
ENSG00000183765.20	0.2395	2.21555e-07
ENSG00000083817.8	-0.2395	2.22074e-07
ENSG00000255561.6	-0.2394	2.22232e-07
ENSG00000187134.13	-0.2394	2.22591e-07
ENSG00000280137.1	0.2394	2.2362e-07
ENSG00000249695.6	0.2393	2.25876e-07
ENSG00000093134.14	0.2393	2.27255e-07
ENSG00000170956.16	0.2392	2.29498e-07
ENSG00000266149.1	0.2391	2.30866e-07
ENSG00000236525.1	0.2391	2.31363e-07
ENSG00000225572.1	0.2389	2.37915e-07
ENSG00000162408.10	-0.2389	2.38882e-07
ENSG00000121410.11	0.2389	2.39263e-07
ENSG00000259959.1	-0.2388	2.41085e-07
ENSG00000136450.12	0.2388	2.42422e-07
ENSG00000159212.12	0.2386	2.46329e-07
ENSG00000213700.3	0.2386	2.4851e-07
ENSG00000197448.13	0.2385	2.51997e-07
ENSG00000173762.7	0.2385	2.52395e-07
ENSG00000214290.8	0.2383	2.59276e-07
ENSG00000110492.15	0.2382	2.63126e-07
ENSG00000167371.17	0.2382	2.63563e-07
ENSG00000196581.10	0.2381	2.67395e-07
ENSG00000258168.5	0.238	2.70366e-07
ENSG00000214826.5	0.2379	2.7079e-07
ENSG00000260082.1	0.2379	2.71212e-07
ENSG00000272666.1	0.2379	2.72053e-07
ENSG00000156026.14	0.2379	2.72477e-07
ENSG00000140406.3	-0.2378	2.75836e-07
ENSG00000226445.1	0.2378	2.76248e-07
ENSG00000166426.7	0.2377	2.79579e-07
ENSG00000163806.15	0.2377	2.79983e-07
ENSG00000113578.17	0.2377	2.80012e-07
ENSG00000225101.4	0.2376	2.82056e-07
ENSG00000125952.18	0.2376	2.83288e-07
ENSG00000142959.4	0.2375	2.85349e-07
ENSG00000277494.1	-0.2375	2.85742e-07
ENSG00000233175.2	0.2375	2.86133e-07
ENSG00000210140.1	-0.2373	2.90664e-07
ENSG00000258741.3	0.2373	2.94355e-07
ENSG00000008517.16	0.2372	2.98034e-07
ENSG00000109107.13	-0.2371	3.00878e-07
ENSG00000124491.15	-0.237	3.05359e-07
ENSG00000163737.3	0.237	3.05717e-07
ENSG00000253307.1	0.2369	3.10178e-07
ENSG00000182890.4	-0.2369	3.10528e-07
ENSG00000259045.1	-0.2368	3.13331e-07
ENSG00000185697.16	0.2367	3.14019e-07
ENSG00000165997.4	0.2368	3.14492e-07
ENSG00000235576.1	0.2366	3.2169e-07
ENSG00000213689.11	-0.2366	3.2235e-07
ENSG00000108773.10	0.2366	3.22834e-07
ENSG00000167553.15	-0.2365	3.24948e-07
ENSG00000261008.6	0.2365	3.2511e-07
ENSG00000154783.11	-0.2365	3.25271e-07
ENSG00000069696.6	0.2365	3.25434e-07
ENSG00000283945.1	0.2364	3.28816e-07
ENSG00000272255.1	0.2363	3.31858e-07
ENSG00000154655.15	0.2363	3.32351e-07
ENSG00000236194.3	0.2363	3.33774e-07
ENSG00000197826.11	0.2362	3.34081e-07
ENSG00000101198.14	0.2362	3.35988e-07
ENSG00000214293.8	0.2362	3.36098e-07
ENSG00000221972.3	-0.2362	3.36291e-07
ENSG00000091140.13	-0.2361	3.364e-07
ENSG00000185022.11	0.2362	3.36593e-07
ENSG00000172732.11	0.236	3.41465e-07
ENSG00000189134.3	-0.236	3.43344e-07
ENSG00000163354.14	0.236	3.44426e-07
ENSG00000272669.1	0.236	3.44714e-07
ENSG00000276058.1	0.2359	3.4844e-07
ENSG00000250602.5	0.2359	3.48721e-07
ENSG00000136449.13	0.2359	3.48948e-07
ENSG00000236184.1	0.2358	3.49001e-07
ENSG00000279570.1	0.2358	3.4928e-07
ENSG00000197119.12	0.2358	3.49558e-07
ENSG00000135482.6	-0.2358	3.49836e-07
ENSG00000197170.9	-0.2357	3.51675e-07
ENSG00000185670.7	-0.2357	3.51949e-07
ENSG00000133574.9	-0.2357	3.53001e-07
ENSG00000227954.6	0.2357	3.5405e-07
ENSG00000148341.17	0.2356	3.55873e-07
ENSG00000186409.14	0.2355	3.60795e-07
ENSG00000175536.6	-0.2355	3.61053e-07
ENSG00000268364.1	0.2355	3.61311e-07
ENSG00000181227.3	-0.2354	3.66204e-07
ENSG00000122779.17	-0.2354	3.66454e-07
ENSG00000151136.14	-0.2354	3.67473e-07
ENSG00000177989.13	0.2353	3.70798e-07
ENSG00000105246.5	-0.2353	3.7104e-07
ENSG00000272533.1	0.2352	3.75117e-07
ENSG00000214753.2	-0.2352	3.75352e-07
ENSG00000067596.10	-0.2352	3.75587e-07
ENSG00000163161.12	0.2352	3.75821e-07
ENSG00000111875.7	-0.2351	3.81394e-07
ENSG00000181513.14	0.235	3.86952e-07
ENSG00000185101.12	0.2349	3.87929e-07
ENSG00000239779.6	0.2349	3.89664e-07
ENSG00000164338.9	-0.2349	3.89877e-07
ENSG00000168404.12	0.2348	3.95391e-07
ENSG00000197057.9	0.2347	3.98621e-07
ENSG00000274565.1	0.2347	4.01842e-07
ENSG00000277566.1	0.2346	4.05054e-07
ENSG00000117691.9	0.2345	4.07503e-07
ENSG00000182544.8	-0.2345	4.1145e-07
ENSG00000167543.15	0.2344	4.12739e-07
ENSG00000205702.10	0.2344	4.13133e-07
ENSG00000076344.15	0.2344	4.13311e-07
ENSG00000221926.11	-0.2343	4.17406e-07
ENSG00000132517.14	0.2343	4.19818e-07
ENSG00000280193.1	-0.2343	4.20732e-07
ENSG00000136327.6	0.2342	4.22388e-07
ENSG00000278834.1	-0.2342	4.27172e-07
ENSG00000214353.7	0.2342	4.27759e-07
ENSG00000162616.8	0.2341	4.31038e-07
ENSG00000106603.18	0.234	4.33412e-07
ENSG00000267570.1	-0.234	4.3356e-07
ENSG00000135392.15	-0.234	4.35185e-07
ENSG00000004939.13	0.2339	4.38281e-07
ENSG00000130827.6	0.2339	4.39159e-07
ENSG00000260592.1	0.2338	4.4351e-07
ENSG00000182704.7	-0.2338	4.43713e-07
ENSG00000210144.1	-0.2338	4.43846e-07
ENSG00000147697.8	-0.2338	4.4411e-07
ENSG00000132664.11	-0.2338	4.44712e-07
ENSG00000065618.18	0.2337	4.48028e-07
ENSG00000271833.1	0.2336	4.56183e-07
ENSG00000221962.5	0.2336	4.59213e-07
ENSG00000118369.12	0.2335	4.65875e-07
ENSG00000235703.5	0.2334	4.6753e-07
ENSG00000130254.11	0.2334	4.68158e-07
ENSG00000104067.16	-0.2334	4.69079e-07
ENSG00000090776.5	-0.2333	4.72796e-07
ENSG00000104221.12	-0.2333	4.75057e-07
ENSG00000198074.9	-0.2332	4.77398e-07
ENSG00000134077.15	-0.2332	4.78035e-07
ENSG00000164283.12	0.2331	4.84685e-07
ENSG00000172738.11	0.233	4.91234e-07
ENSG00000188396.3	0.233	4.94892e-07
ENSG00000026025.15	0.233	4.94954e-07
ENSG00000142330.19	0.2329	4.97881e-07
ENSG00000009724.16	-0.2329	5.00085e-07
ENSG00000139797.7	0.2328	5.07285e-07
ENSG00000134575.9	-0.2326	5.16606e-07
ENSG00000061938.16	0.2326	5.20202e-07
ENSG00000237669.1	0.2325	5.22365e-07
ENSG00000136155.16	0.2325	5.25233e-07
ENSG00000186280.6	-0.2325	5.25255e-07
ENSG00000167615.16	0.2325	5.28111e-07
ENSG00000130024.14	0.2324	5.30253e-07
ENSG00000204622.11	0.2324	5.32389e-07
ENSG00000124508.16	0.2324	5.34519e-07
ENSG00000005513.9	0.2322	5.42285e-07
ENSG00000100083.18	0.2322	5.47214e-07
ENSG00000225889.7	0.2321	5.50009e-07
ENSG00000272888.5	0.2321	5.5002e-07
ENSG00000166965.12	0.2321	5.507e-07
ENSG00000161381.13	0.2321	5.52775e-07
ENSG00000259751.1	-0.2321	5.5279e-07
ENSG00000100764.13	-0.232	5.54126e-07
ENSG00000225300.1	0.232	5.54142e-07
ENSG00000274307.1	0.232	5.54159e-07
ENSG00000143442.21	0.232	5.55484e-07
ENSG00000143315.6	-0.232	5.56198e-07
ENSG00000181085.14	0.232	5.58244e-07
ENSG00000241288.7	0.2319	5.62251e-07
ENSG00000171877.20	0.2319	5.62357e-07
ENSG00000170919.15	0.2319	5.62967e-07
ENSG00000125968.8	-0.2319	5.63077e-07
ENSG00000166448.14	0.2319	5.63685e-07
ENSG00000176125.4	-0.2318	5.64289e-07
ENSG00000163873.9	0.2319	5.64405e-07
ENSG00000229246.1	0.2318	5.64948e-07
ENSG00000162407.8	-0.2317	5.70409e-07
ENSG00000117472.9	0.2317	5.71058e-07
ENSG00000207304.1	0.2317	5.74445e-07
ENSG00000235586.1	0.2314	5.95601e-07
ENSG00000278259.4	0.2313	6.04411e-07
ENSG00000143951.15	0.2313	6.06978e-07
ENSG00000236138.4	0.2313	6.07061e-07
ENSG00000229891.1	0.2312	6.1225e-07
ENSG00000189046.10	-0.2312	6.1302e-07
ENSG00000283928.1	0.2311	6.20306e-07
ENSG00000119650.12	0.231	6.29019e-07
ENSG00000138378.17	0.231	6.29587e-07
ENSG00000124222.22	0.231	6.30153e-07
ENSG00000242337.5	0.2309	6.3477e-07
ENSG00000176396.10	-0.2308	6.48817e-07
ENSG00000101901.11	0.2307	6.50704e-07
ENSG00000241560.5	0.2307	6.54605e-07
ENSG00000238290.1	0.2306	6.64544e-07
ENSG00000206195.10	0.2306	6.65734e-07
ENSG00000075826.16	0.2305	6.66251e-07
ENSG00000260314.2	-0.2305	6.67435e-07
ENSG00000261971.6	0.2305	6.73298e-07
ENSG00000140961.12	-0.2303	6.90498e-07
ENSG00000233170.4	-0.2302	6.98318e-07
ENSG00000134014.16	-0.2302	7.02122e-07
ENSG00000189403.14	0.2301	7.1124e-07
ENSG00000277089.4	0.23	7.20999e-07
ENSG00000175073.7	-0.2299	7.26089e-07
ENSG00000065600.12	0.2298	7.32921e-07
ENSG00000105650.21	0.2298	7.33155e-07
ENSG00000203286.5	-0.2298	7.393e-07
ENSG00000109072.13	0.2297	7.4104e-07
ENSG00000231925.11	0.2297	7.44508e-07
ENSG00000163393.12	0.2297	7.45415e-07
ENSG00000155903.11	0.2297	7.4821e-07
ENSG00000143368.9	-0.2296	7.48616e-07
ENSG00000232533.1	0.2295	7.60181e-07
ENSG00000280287.1	0.2294	7.68166e-07
ENSG00000254162.1	-0.2295	7.69096e-07
ENSG00000037042.8	0.2294	7.69201e-07
ENSG00000204920.10	-0.2294	7.77419e-07
ENSG00000077984.5	0.2293	7.8366e-07
ENSG00000091073.19	0.2293	7.87279e-07
ENSG00000230457.3	0.2292	7.90889e-07
ENSG00000181790.10	0.2292	7.9189e-07
ENSG00000144504.15	0.2291	7.99382e-07
ENSG00000059728.10	0.2291	7.99722e-07
ENSG00000143702.15	0.2291	8.0654e-07
ENSG00000270077.1	-0.229	8.14635e-07
ENSG00000141642.8	-0.2288	8.30466e-07
ENSG00000198786.2	-0.2288	8.32703e-07
ENSG00000171169.8	-0.2288	8.38451e-07
ENSG00000002745.12	0.2288	8.39449e-07
ENSG00000147679.11	-0.2287	8.42601e-07
ENSG00000198089.15	0.2287	8.48668e-07
ENSG00000243708.10	0.2286	8.49864e-07
ENSG00000163734.4	0.2286	8.50871e-07
ENSG00000279713.1	0.2286	8.55261e-07
ENSG00000167608.11	0.2285	8.59367e-07
ENSG00000198920.9	0.2285	8.6474e-07
ENSG00000188229.5	-0.2285	8.64997e-07
ENSG00000211689.7	0.2283	8.89466e-07
ENSG00000065054.13	-0.2282	9.0624e-07
ENSG00000241404.6	0.228	9.27424e-07
ENSG00000249138.1	0.2279	9.4094e-07
ENSG00000110852.4	0.2278	9.46814e-07
ENSG00000197629.5	-0.2278	9.52979e-07
ENSG00000235453.8	0.2278	9.53307e-07
ENSG00000158435.7	-0.2278	9.54092e-07
ENSG00000257086.1	0.2277	9.64492e-07
ENSG00000271207.1	-0.2277	9.65891e-07
ENSG00000159228.12	-0.2276	9.70436e-07
ENSG00000274678.1	0.2276	9.73083e-07
ENSG00000120733.13	-0.2275	9.80122e-07
ENSG00000113263.12	0.2274	1.00472e-06
ENSG00000259865.1	0.2273	1.01734e-06
ENSG00000183918.15	0.2273	1.01805e-06
ENSG00000185630.18	-0.2272	1.0225e-06
ENSG00000163687.13	0.2272	1.02319e-06
ENSG00000075461.5	0.2272	1.02326e-06
ENSG00000274712.1	0.2272	1.02458e-06
ENSG00000203883.6	-0.2272	1.02776e-06
ENSG00000202318.1	0.2271	1.0415e-06
ENSG00000274911.1	0.227	1.04652e-06
ENSG00000198839.9	0.227	1.04718e-06
ENSG00000267325.1	0.2269	1.0584e-06
ENSG00000104177.17	0.2269	1.05899e-06
ENSG00000100902.10	-0.2269	1.0677e-06
ENSG00000225484.6	0.2268	1.07019e-06
ENSG00000198155.5	0.2267	1.08686e-06
ENSG00000143971.7	-0.2267	1.09055e-06
ENSG00000077238.13	0.2267	1.09239e-06
ENSG00000132424.14	0.2267	1.093e-06
ENSG00000226380.9	0.2266	1.10527e-06
ENSG00000119401.10	-0.2266	1.10769e-06
ENSG00000279135.1	0.2265	1.11624e-06
ENSG00000102145.13	0.2264	1.13028e-06
ENSG00000198930.12	0.2263	1.14062e-06
ENSG00000265194.1	0.2263	1.14178e-06
ENSG00000105401.8	0.2263	1.14232e-06
ENSG00000176732.6	0.2263	1.14469e-06
ENSG00000124120.10	-0.2262	1.1501e-06
ENSG00000206579.8	0.2262	1.16096e-06
ENSG00000229502.5	0.2261	1.16321e-06
ENSG00000006638.11	-0.2262	1.1633e-06
ENSG00000175197.11	0.226	1.18312e-06
ENSG00000279862.1	0.2259	1.19934e-06
ENSG00000246695.7	0.2259	1.20344e-06
ENSG00000250846.6	0.2258	1.22505e-06
ENSG00000117593.9	-0.2257	1.22774e-06
ENSG00000165923.15	0.2257	1.22851e-06
ENSG00000276248.1	0.2257	1.23661e-06
ENSG00000114378.16	-0.2256	1.25267e-06
ENSG00000111790.13	0.2256	1.25428e-06
ENSG00000139908.14	-0.2255	1.25769e-06
ENSG00000254689.1	0.2254	1.27307e-06
ENSG00000279396.1	0.2253	1.29609e-06
ENSG00000221044.2	-0.2253	1.29633e-06
ENSG00000271913.5	0.2253	1.29716e-06
ENSG00000239884.3	0.2253	1.298e-06
ENSG00000235571.1	0.2252	1.31195e-06
ENSG00000279841.1	0.2252	1.31467e-06
ENSG00000230071.2	0.2251	1.32571e-06
ENSG00000081913.13	-0.2251	1.3302e-06
ENSG00000173369.15	-0.225	1.3406e-06
ENSG00000171735.18	0.225	1.34091e-06
ENSG00000105088.8	-0.225	1.34359e-06
ENSG00000178919.8	-0.2249	1.35631e-06
ENSG00000115239.21	0.2249	1.36429e-06
ENSG00000225756.1	0.2249	1.36752e-06
ENSG00000270956.1	0.2248	1.37428e-06
ENSG00000205129.8	0.2248	1.38574e-06
ENSG00000066923.17	0.2247	1.38717e-06
ENSG00000105849.5	-0.2247	1.40177e-06
ENSG00000261505.1	0.2247	1.40212e-06
ENSG00000108671.9	-0.2246	1.41022e-06
ENSG00000178053.17	0.2245	1.4204e-06
ENSG00000130522.5	0.2245	1.42355e-06
ENSG00000147573.16	0.2245	1.43565e-06
ENSG00000117597.17	-0.2245	1.43603e-06
ENSG00000277363.4	0.2244	1.44227e-06
ENSG00000237505.6	0.2243	1.471e-06
ENSG00000204380.4	0.2242	1.47815e-06
ENSG00000156959.8	0.2242	1.4876e-06
ENSG00000067836.12	0.2241	1.50574e-06
ENSG00000178078.11	0.224	1.51295e-06
ENSG00000101916.11	-0.224	1.51457e-06
ENSG00000226318.1	0.224	1.5148e-06
ENSG00000238121.5	0.224	1.51897e-06
ENSG00000262370.5	0.224	1.51977e-06
ENSG00000241058.3	0.224	1.52139e-06
ENSG00000237732.9	0.2238	1.55215e-06
ENSG00000178467.17	0.2238	1.55337e-06
ENSG00000109610.5	0.2237	1.57932e-06
ENSG00000142319.17	0.2236	1.59315e-06
ENSG00000271426.1	0.2236	1.60638e-06
ENSG00000140873.15	0.2235	1.61041e-06
ENSG00000273923.1	0.2234	1.63562e-06
ENSG00000198712.1	-0.2234	1.64647e-06
ENSG00000151715.7	0.2233	1.65616e-06
ENSG00000272551.1	0.2233	1.65834e-06
ENSG00000173372.16	-0.2233	1.65952e-06
ENSG00000169228.13	0.2233	1.66012e-06
ENSG00000083814.13	-0.2232	1.67082e-06
ENSG00000239650.4	0.2232	1.68479e-06
ENSG00000283994.1	0.2232	1.68485e-06
ENSG00000273797.1	0.2231	1.68529e-06
ENSG00000064201.15	0.2232	1.68612e-06
ENSG00000142961.14	0.2232	1.68662e-06
ENSG00000225442.2	0.223	1.7055e-06
ENSG00000204681.10	0.2231	1.70558e-06
ENSG00000132434.9	-0.223	1.71613e-06
ENSG00000132688.10	-0.223	1.72054e-06
ENSG00000156042.17	0.2229	1.73339e-06
ENSG00000258384.1	0.2229	1.73722e-06
ENSG00000263345.1	0.2229	1.74328e-06
ENSG00000164066.12	0.2228	1.7454e-06
ENSG00000267096.1	-0.2228	1.75649e-06
ENSG00000251330.3	-0.2228	1.76364e-06
ENSG00000174840.8	-0.2227	1.76965e-06
ENSG00000108055.9	-0.2227	1.77453e-06
ENSG00000087085.13	0.2226	1.78777e-06
ENSG00000221978.11	0.2226	1.8088e-06
ENSG00000102901.12	0.2225	1.81955e-06
ENSG00000170214.3	-0.2225	1.81975e-06
ENSG00000274598.1	0.2225	1.82471e-06
ENSG00000112679.14	0.2225	1.82547e-06
ENSG00000162931.11	0.2223	1.85669e-06
ENSG00000246889.2	0.2223	1.86064e-06
ENSG00000005194.14	-0.2223	1.86088e-06
ENSG00000182902.13	-0.2223	1.86317e-06
ENSG00000259201.1	0.2223	1.87121e-06
ENSG00000132640.14	-0.2222	1.88642e-06
ENSG00000115274.14	0.2222	1.89415e-06
ENSG00000132530.16	0.2222	1.89553e-06
ENSG00000259416.2	0.2221	1.91395e-06
ENSG00000168710.17	-0.2221	1.91424e-06
ENSG00000221994.10	0.222	1.93453e-06
ENSG00000104714.13	0.222	1.9419e-06
ENSG00000171798.17	0.2219	1.94212e-06
ENSG00000233006.6	0.2219	1.94673e-06
ENSG00000188176.11	-0.2218	1.96665e-06
ENSG00000132825.6	-0.2217	1.99745e-06
ENSG00000125337.16	0.2217	1.99817e-06
ENSG00000228686.2	0.2217	2.00052e-06
ENSG00000169592.14	0.2217	2.00249e-06
ENSG00000275318.1	-0.2217	2.00287e-06
ENSG00000273142.1	0.2217	2.00374e-06
ENSG00000099985.3	0.2217	2.0039e-06
ENSG00000270093.1	-0.2216	2.01926e-06
ENSG00000132024.17	0.2215	2.04326e-06
ENSG00000206816.1	0.2215	2.05096e-06
ENSG00000253406.1	0.2214	2.08679e-06
ENSG00000274475.1	-0.2213	2.1047e-06
ENSG00000167754.12	0.2212	2.11826e-06
ENSG00000254632.1	-0.2212	2.12856e-06
ENSG00000185187.12	0.2212	2.13237e-06
ENSG00000272405.1	-0.2211	2.14371e-06
ENSG00000091527.15	0.2211	2.16363e-06
ENSG00000153767.9	-0.221	2.17438e-06
ENSG00000167191.11	-0.221	2.18564e-06
ENSG00000213918.10	0.221	2.18884e-06
ENSG00000119509.12	0.2209	2.1931e-06
ENSG00000246451.2	0.2209	2.19682e-06
ENSG00000280789.1	0.2209	2.20531e-06
ENSG00000138483.2	0.2209	2.20535e-06
ENSG00000059915.16	0.2209	2.20634e-06
ENSG00000243422.2	0.2208	2.22496e-06
ENSG00000280149.1	0.2208	2.23874e-06
ENSG00000132801.6	-0.2206	2.2807e-06
ENSG00000151576.10	-0.2206	2.29388e-06
ENSG00000227398.3	0.2206	2.30012e-06
ENSG00000047457.13	0.2205	2.30052e-06
ENSG00000240303.7	0.2205	2.30608e-06
ENSG00000168096.14	0.2205	2.30728e-06
ENSG00000174501.14	0.2205	2.31811e-06
ENSG00000232311.1	-0.2204	2.34015e-06
ENSG00000144843.11	-0.2204	2.34474e-06
ENSG00000100321.14	0.2204	2.34614e-06
ENSG00000231731.7	0.2204	2.34702e-06
ENSG00000245213.6	0.2204	2.34737e-06
ENSG00000124818.15	0.2203	2.34877e-06
ENSG00000196866.2	0.2203	2.37066e-06
ENSG00000223773.7	0.2203	2.37309e-06
ENSG00000164483.16	0.2202	2.38075e-06
ENSG00000271503.5	0.2202	2.3884e-06
ENSG00000189060.5	-0.2201	2.41173e-06
ENSG00000118432.12	-0.2201	2.42038e-06
ENSG00000279447.1	0.2201	2.4264e-06
ENSG00000271869.1	0.2201	2.42928e-06
ENSG00000100220.11	-0.22	2.43685e-06
ENSG00000116962.14	-0.22	2.45117e-06
ENSG00000267397.1	-0.2199	2.45842e-06
ENSG00000139323.13	0.2199	2.46026e-06
ENSG00000077312.8	0.2199	2.47891e-06
ENSG00000187775.16	0.2198	2.49884e-06
ENSG00000159079.18	0.2198	2.50319e-06
ENSG00000173786.16	-0.2198	2.50856e-06
ENSG00000229901.1	0.2197	2.5491e-06
ENSG00000245694.9	0.2196	2.55235e-06
ENSG00000166166.12	0.2195	2.58451e-06
ENSG00000280649.2	0.2195	2.58463e-06
ENSG00000267750.5	0.2195	2.58898e-06
ENSG00000161649.12	-0.2195	2.59012e-06
ENSG00000187672.12	0.2195	2.59041e-06
ENSG00000108798.8	-0.2195	2.6e-06
ENSG00000085465.12	0.2194	2.62628e-06
ENSG00000120963.11	0.2193	2.64738e-06
ENSG00000219545.11	0.2193	2.65103e-06
ENSG00000105185.11	0.2193	2.65518e-06
ENSG00000272077.1	-0.2193	2.65829e-06
ENSG00000076248.10	-0.2192	2.66758e-06
ENSG00000115257.15	0.2192	2.66907e-06
ENSG00000198821.10	0.2192	2.66914e-06
ENSG00000140259.6	-0.2192	2.68039e-06
ENSG00000251432.6	0.2192	2.68805e-06
ENSG00000188050.2	0.2191	2.70129e-06
ENSG00000170903.10	-0.219	2.72565e-06
ENSG00000224945.1	0.2191	2.72568e-06
ENSG00000134317.17	0.219	2.7277e-06
ENSG00000166821.8	-0.219	2.73171e-06
ENSG00000158106.13	0.2189	2.76504e-06
ENSG00000147889.17	0.2189	2.76763e-06
ENSG00000188596.10	0.2189	2.76802e-06
ENSG00000237512.6	0.2187	2.83661e-06
ENSG00000240498.6	0.2187	2.85767e-06
ENSG00000205639.9	0.2186	2.8671e-06
ENSG00000251003.7	0.2185	2.90671e-06
ENSG00000278231.1	-0.2185	2.90754e-06
ENSG00000169126.15	0.2185	2.91187e-06
ENSG00000122965.10	0.2185	2.91369e-06
ENSG00000157379.13	0.2185	2.92704e-06
ENSG00000280035.1	0.2185	2.92984e-06
ENSG00000121058.4	-0.2184	2.94215e-06
ENSG00000198858.9	0.2184	2.94694e-06
ENSG00000235790.7	0.2183	2.98169e-06
ENSG00000275693.1	0.2183	2.99365e-06
ENSG00000241157.1	0.2183	2.99391e-06
ENSG00000145242.13	0.2183	3.00036e-06
ENSG00000188996.4	0.2182	3.01602e-06
ENSG00000215158.9	0.2182	3.02121e-06
ENSG00000238083.7	0.2181	3.05769e-06
ENSG00000103269.13	0.2181	3.06052e-06
ENSG00000082397.17	0.2181	3.06085e-06
ENSG00000152082.13	0.218	3.07423e-06
ENSG00000225079.2	0.218	3.07457e-06
ENSG00000100593.17	0.218	3.08345e-06
ENSG00000274993.1	0.218	3.08379e-06
ENSG00000213707.2	0.2179	3.12112e-06
ENSG00000196460.12	0.2179	3.1253e-06
ENSG00000115540.14	-0.2179	3.12765e-06
ENSG00000088280.18	0.2178	3.16824e-06
ENSG00000251022.6	0.2177	3.20324e-06
ENSG00000149932.16	0.2177	3.20427e-06
ENSG00000058729.10	-0.2176	3.21857e-06
ENSG00000251301.6	0.2177	3.21953e-06
ENSG00000165121.11	0.2176	3.23381e-06
ENSG00000088448.14	0.2176	3.23429e-06
ENSG00000224821.5	0.2176	3.2397e-06
ENSG00000124635.8	0.2175	3.26608e-06
ENSG00000204387.12	0.2175	3.2661e-06
ENSG00000235947.1	0.2175	3.27485e-06
ENSG00000102606.17	0.2174	3.29628e-06
ENSG00000126214.21	0.2174	3.33179e-06
ENSG00000242759.6	0.2173	3.34291e-06
ENSG00000137055.14	-0.2173	3.34623e-06
ENSG00000214654.7	-0.2173	3.36362e-06
ENSG00000104885.17	-0.2172	3.38051e-06
ENSG00000019186.9	0.2172	3.40463e-06
ENSG00000245067.6	0.2171	3.45197e-06
ENSG00000213658.11	0.217	3.45759e-06
ENSG00000225968.7	-0.217	3.46853e-06
ENSG00000197948.10	0.217	3.49829e-06
ENSG00000050426.15	0.2169	3.52027e-06
ENSG00000188785.11	0.2169	3.54173e-06
ENSG00000163116.9	0.2168	3.55737e-06
ENSG00000088305.18	-0.2168	3.58406e-06
ENSG00000275371.1	0.2167	3.59482e-06
ENSG00000242866.9	0.2167	3.60268e-06
ENSG00000213199.7	0.2167	3.60477e-06
ENSG00000254461.1	0.2167	3.61981e-06
ENSG00000272768.1	0.2167	3.61996e-06
ENSG00000273179.1	0.2166	3.6565e-06
ENSG00000243715.1	0.2165	3.67815e-06
ENSG00000116273.5	0.2165	3.6859e-06
ENSG00000167657.13	0.2165	3.70748e-06
ENSG00000007341.18	0.2163	3.78677e-06
ENSG00000162366.7	0.2163	3.80107e-06
ENSG00000171566.11	-0.2162	3.81488e-06
ENSG00000162396.5	-0.2162	3.83532e-06
ENSG00000205464.11	0.2161	3.867e-06
ENSG00000164944.11	-0.2161	3.86802e-06
ENSG00000133639.4	0.2161	3.87094e-06
ENSG00000228513.1	0.2161	3.88069e-06
ENSG00000147883.10	0.216	3.89672e-06
ENSG00000128383.12	0.216	3.91131e-06
ENSG00000106852.15	-0.216	3.91167e-06
ENSG00000178404.9	0.216	3.92102e-06
ENSG00000253651.1	0.2159	3.94533e-06
ENSG00000149308.16	-0.2159	3.94688e-06
ENSG00000182993.3	0.2159	3.97536e-06
ENSG00000259146.3	0.2159	3.97849e-06
ENSG00000122432.17	0.2158	3.98021e-06
ENSG00000169955.7	-0.2158	3.99885e-06
ENSG00000237596.6	0.2158	4.00102e-06
ENSG00000104859.14	0.2158	4.0229e-06
ENSG00000255504.2	0.2157	4.03348e-06
ENSG00000163823.3	-0.2157	4.03608e-06
ENSG00000238133.6	0.2156	4.08549e-06
ENSG00000227766.1	0.2156	4.09599e-06
ENSG00000197748.12	0.2156	4.10367e-06
ENSG00000277075.2	0.2156	4.11013e-06
ENSG00000125869.9	0.2156	4.11367e-06
ENSG00000110079.16	-0.2155	4.12617e-06
ENSG00000277423.1	-0.2155	4.1338e-06
ENSG00000168488.18	0.2155	4.13629e-06
ENSG00000224057.1	0.2155	4.15552e-06
ENSG00000198520.10	0.2154	4.17193e-06
ENSG00000100399.15	0.2154	4.20595e-06
ENSG00000110719.9	0.2154	4.20605e-06
ENSG00000104731.13	0.2152	4.28492e-06
ENSG00000264589.2	0.2151	4.32709e-06
ENSG00000197457.9	0.2151	4.33634e-06
ENSG00000233448.2	0.2151	4.3548e-06
ENSG00000128654.13	0.2151	4.35806e-06
ENSG00000135365.15	0.2151	4.36032e-06
ENSG00000204531.17	0.215	4.36951e-06
ENSG00000086015.20	0.215	4.36994e-06
ENSG00000006025.11	0.215	4.39844e-06
ENSG00000260403.1	0.215	4.4108e-06
ENSG00000165359.15	0.2149	4.4314e-06
ENSG00000079785.14	-0.2149	4.43774e-06
ENSG00000266954.1	0.2148	4.48672e-06
ENSG00000217930.7	0.2148	4.5153e-06
ENSG00000264608.1	0.2148	4.51683e-06
ENSG00000174004.5	-0.2147	4.52521e-06
ENSG00000255182.2	0.2147	4.54973e-06
ENSG00000274641.1	0.2147	4.56188e-06
ENSG00000245261.1	0.2146	4.57765e-06
ENSG00000198746.12	-0.2146	4.58246e-06
ENSG00000271303.1	-0.2146	4.59637e-06
ENSG00000241350.1	0.2146	4.60571e-06
ENSG00000203993.4	0.2145	4.66004e-06
ENSG00000165071.14	0.2145	4.66477e-06
ENSG00000173531.15	0.2144	4.67902e-06
ENSG00000242861.1	0.2144	4.69732e-06
ENSG00000250329.1	0.2144	4.70215e-06
ENSG00000260025.1	0.2144	4.70246e-06
ENSG00000263648.1	0.2144	4.70274e-06
ENSG00000135502.17	0.2144	4.70831e-06
ENSG00000100453.12	0.2143	4.74052e-06
ENSG00000136267.13	0.2143	4.7465e-06
ENSG00000167377.17	0.2143	4.74751e-06
ENSG00000130813.17	0.2143	4.75122e-06
ENSG00000163421.8	0.2142	4.77518e-06
ENSG00000107338.9	0.2142	4.8009e-06
ENSG00000118655.4	-0.2142	4.80501e-06
ENSG00000078487.17	0.2141	4.83967e-06
ENSG00000187288.10	-0.2141	4.84054e-06
ENSG00000100351.16	0.214	4.91188e-06
ENSG00000177575.12	-0.214	4.92394e-06
ENSG00000249006.1	0.2139	4.95255e-06
ENSG00000188064.9	0.2139	4.96769e-06
ENSG00000140534.13	0.2139	4.97878e-06
ENSG00000205959.3	0.2138	5.02959e-06
ENSG00000179335.18	0.2138	5.03036e-06
ENSG00000007933.12	0.2138	5.04137e-06
ENSG00000204439.3	-0.2137	5.0929e-06
ENSG00000188002.10	0.2137	5.10073e-06
ENSG00000134508.12	-0.2137	5.10143e-06
ENSG00000229358.3	0.2137	5.1088e-06
ENSG00000100836.10	0.2136	5.12992e-06
ENSG00000166105.15	0.2136	5.13725e-06
ENSG00000143552.9	0.2135	5.19553e-06
ENSG00000236278.2	0.2135	5.20723e-06
ENSG00000274020.2	0.2135	5.21182e-06
ENSG00000124067.16	0.2135	5.21746e-06
ENSG00000204789.4	0.2135	5.21906e-06
ENSG00000179397.17	0.2134	5.23498e-06
ENSG00000229152.2	0.2134	5.23733e-06
ENSG00000234584.1	0.2134	5.23748e-06
ENSG00000178947.8	0.2133	5.30669e-06
ENSG00000232043.1	0.2133	5.30722e-06
ENSG00000267222.1	0.2133	5.31057e-06
ENSG00000151575.14	0.2133	5.31302e-06
ENSG00000197302.10	0.2132	5.33561e-06
ENSG00000145198.14	0.2132	5.33768e-06
ENSG00000228343.1	0.2132	5.33862e-06
ENSG00000136603.13	0.2132	5.38428e-06
ENSG00000171812.12	0.2131	5.39354e-06
ENSG00000122687.17	-0.2131	5.39789e-06
ENSG00000251136.8	0.2131	5.4005e-06
ENSG00000225400.1	0.2131	5.40224e-06
ENSG00000163794.6	0.2131	5.43019e-06
ENSG00000101082.13	0.2131	5.44586e-06
ENSG00000183154.1	-0.213	5.48067e-06
ENSG00000100629.16	0.213	5.50585e-06
ENSG00000272037.1	0.2129	5.54098e-06
ENSG00000122862.4	0.2129	5.54696e-06
ENSG00000184368.15	0.2128	5.60544e-06
ENSG00000250318.1	0.2128	5.63044e-06
ENSG00000085491.15	-0.2128	5.64005e-06
ENSG00000243660.9	0.2128	5.6411e-06
ENSG00000225224.1	0.2127	5.64204e-06
ENSG00000103978.15	-0.2126	5.73565e-06
ENSG00000103381.11	-0.2126	5.73971e-06
ENSG00000231443.2	0.2126	5.74722e-06
ENSG00000160781.15	0.2125	5.82543e-06
ENSG00000157873.17	0.2125	5.83286e-06
ENSG00000136003.15	0.2125	5.842e-06
ENSG00000270248.1	-0.2124	5.87479e-06
ENSG00000268442.1	0.2124	5.89334e-06
ENSG00000125388.19	0.2123	5.92044e-06
ENSG00000239732.3	0.2123	5.92734e-06
ENSG00000171368.11	0.2123	5.94323e-06
ENSG00000163825.3	-0.2123	5.94581e-06
ENSG00000198727.2	-0.2123	5.95353e-06
ENSG00000114841.17	0.2123	5.95524e-06
ENSG00000047579.19	0.2123	5.96037e-06
ENSG00000138134.11	0.2123	5.96165e-06
ENSG00000266315.1	0.2122	6.02396e-06
ENSG00000135622.12	0.2121	6.10203e-06
ENSG00000131480.8	0.2121	6.10597e-06
ENSG00000160298.17	0.2121	6.10993e-06
ENSG00000168040.4	-0.2121	6.11346e-06
ENSG00000235770.5	0.2119	6.20139e-06
ENSG00000198521.11	-0.2119	6.23688e-06
ENSG00000276966.2	0.2119	6.24472e-06
ENSG00000175538.10	0.2119	6.24704e-06
ENSG00000184857.7	-0.2118	6.25694e-06
ENSG00000146067.15	0.2118	6.26099e-06
ENSG00000149571.11	0.2118	6.26165e-06
ENSG00000143067.4	-0.2118	6.27108e-06
ENSG00000104970.10	0.2118	6.28917e-06
ENSG00000267592.1	0.2118	6.29313e-06
ENSG00000267009.6	0.2118	6.29323e-06
ENSG00000184678.10	0.2117	6.31099e-06
ENSG00000135116.9	0.2117	6.32419e-06
ENSG00000181092.9	-0.2117	6.32601e-06
ENSG00000087903.12	0.2117	6.33077e-06
ENSG00000198517.9	0.2117	6.36745e-06
ENSG00000101194.17	0.2116	6.41415e-06
ENSG00000156265.15	0.2115	6.47337e-06
ENSG00000249212.1	0.2115	6.52243e-06
ENSG00000170365.9	-0.2114	6.54378e-06
ENSG00000205810.8	0.2114	6.61155e-06
ENSG00000102452.15	0.2113	6.62484e-06
ENSG00000266865.6	0.2113	6.63717e-06
ENSG00000235522.6	0.2113	6.63812e-06
ENSG00000257531.2	0.2113	6.64917e-06
ENSG00000139719.9	-0.2113	6.66239e-06
ENSG00000185090.14	0.2112	6.68851e-06
ENSG00000129226.13	-0.2112	6.70169e-06
ENSG00000181631.6	-0.2112	6.70403e-06
ENSG00000074266.19	0.2111	6.77952e-06
ENSG00000236120.6	-0.2111	6.78387e-06
ENSG00000271181.1	0.2111	6.80233e-06
ENSG00000275183.1	-0.2111	6.82324e-06
ENSG00000153487.12	0.211	6.83046e-06
ENSG00000221819.5	-0.211	6.83476e-06
ENSG00000168918.13	0.211	6.85037e-06
ENSG00000163611.11	0.211	6.85229e-06
ENSG00000124256.14	0.211	6.8786e-06
ENSG00000086506.2	0.211	6.88792e-06
ENSG00000105675.8	-0.2109	6.88804e-06
ENSG00000147437.9	0.211	6.89111e-06
ENSG00000185361.8	-0.2109	6.91081e-06
ENSG00000214922.9	0.2109	6.91667e-06
ENSG00000272754.1	-0.2109	6.93321e-06
ENSG00000106483.11	0.2109	6.95219e-06
ENSG00000223534.1	0.2108	6.97443e-06
ENSG00000265205.1	-0.2108	6.99459e-06
ENSG00000133835.14	-0.2108	7.01061e-06
ENSG00000166106.3	-0.2108	7.02538e-06
ENSG00000176102.11	0.2108	7.03031e-06
ENSG00000196653.11	-0.2107	7.04013e-06
ENSG00000271161.1	-0.2107	7.04095e-06
ENSG00000279528.1	0.2107	7.10916e-06
ENSG00000223042.1	0.2106	7.19236e-06
ENSG00000004846.16	0.2105	7.22283e-06
ENSG00000181201.3	0.2105	7.23614e-06
ENSG00000244627.5	0.2104	7.33128e-06
ENSG00000021645.18	0.2104	7.33391e-06
ENSG00000270069.1	0.2104	7.33857e-06
ENSG00000183853.17	-0.2103	7.37491e-06
ENSG00000243156.7	0.2103	7.38441e-06
ENSG00000204410.14	0.2103	7.42066e-06
ENSG00000177606.6	0.2103	7.44389e-06
ENSG00000134574.11	0.2102	7.4789e-06
ENSG00000279296.1	0.2102	7.47923e-06
ENSG00000269343.6	-0.2102	7.48424e-06
ENSG00000259762.1	0.2101	7.551e-06
ENSG00000260160.1	0.2101	7.57081e-06
ENSG00000131748.15	0.2101	7.58333e-06
ENSG00000106686.16	0.2101	7.58737e-06
ENSG00000278983.1	0.21	7.64055e-06
ENSG00000175595.14	-0.21	7.66265e-06
ENSG00000249207.1	0.21	7.6972e-06
ENSG00000168612.4	-0.2099	7.74174e-06
ENSG00000272108.1	0.2099	7.77376e-06
ENSG00000021300.13	0.2099	7.7957e-06
ENSG00000230018.1	0.2098	7.80718e-06
ENSG00000260799.1	0.2098	7.81342e-06
ENSG00000008300.16	0.2098	7.81926e-06
ENSG00000163975.11	0.2098	7.8435e-06
ENSG00000117682.16	-0.2097	7.90171e-06
ENSG00000184787.18	0.2097	7.93105e-06
ENSG00000100285.9	-0.2097	7.96554e-06
ENSG00000012171.19	0.2096	8.04228e-06
ENSG00000054611.13	0.2096	8.04593e-06
ENSG00000105701.15	0.2095	8.11015e-06
ENSG00000103995.13	0.2095	8.15874e-06
ENSG00000144524.17	0.2094	8.15988e-06
ENSG00000128272.14	0.2094	8.16429e-06
ENSG00000171115.3	-0.2094	8.16622e-06
ENSG00000167987.10	0.2094	8.22805e-06
ENSG00000150455.13	-0.2094	8.2309e-06
ENSG00000129518.8	-0.2093	8.2589e-06
ENSG00000001497.16	0.2093	8.30475e-06
ENSG00000118690.12	0.2093	8.30686e-06
ENSG00000009335.17	-0.2093	8.31214e-06
ENSG00000228486.10	0.2093	8.32096e-06
ENSG00000164070.11	0.2093	8.32595e-06
ENSG00000063177.12	0.2092	8.33449e-06
ENSG00000100226.15	0.2092	8.34933e-06
ENSG00000184922.13	0.2092	8.37596e-06
ENSG00000274297.1	0.2091	8.48882e-06
ENSG00000248503.2	0.2091	8.49407e-06
ENSG00000225470.7	0.2089	8.66017e-06
ENSG00000169018.5	-0.2089	8.66017e-06
ENSG00000103313.12	0.2089	8.66489e-06
ENSG00000092529.23	0.2089	8.68647e-06
ENSG00000237499.6	0.2089	8.68763e-06
ENSG00000162595.5	0.2088	8.76639e-06
ENSG00000145864.12	0.2086	8.98561e-06
ENSG00000279512.1	0.2086	9.00807e-06
ENSG00000112077.15	0.2086	9.04732e-06
ENSG00000185158.12	0.2086	9.05486e-06
ENSG00000122507.20	0.2085	9.06551e-06
ENSG00000146278.10	0.2085	9.08005e-06
ENSG00000180596.7	0.2085	9.15344e-06
ENSG00000125630.15	-0.2084	9.1601e-06
ENSG00000237513.1	0.2084	9.16987e-06
ENSG00000213937.3	0.2084	9.18663e-06
ENSG00000160963.13	0.2084	9.24302e-06
ENSG00000272604.1	-0.2083	9.27058e-06
ENSG00000050405.13	0.2083	9.28645e-06
ENSG00000139496.15	0.2083	9.30758e-06
ENSG00000154124.4	0.2083	9.30843e-06
ENSG00000241218.1	0.2083	9.31393e-06
ENSG00000154640.14	0.2083	9.31487e-06
ENSG00000088340.15	0.2082	9.34767e-06
ENSG00000184588.17	0.2082	9.35569e-06
ENSG00000008405.11	0.2082	9.3978e-06
ENSG00000147724.11	0.2082	9.40141e-06
ENSG00000265107.2	-0.2082	9.40696e-06
ENSG00000261799.1	-0.2082	9.42156e-06
ENSG00000168994.13	0.2082	9.42565e-06
ENSG00000151632.17	-0.2081	9.44012e-06
ENSG00000142920.16	0.2081	9.46303e-06
ENSG00000205060.10	-0.208	9.54357e-06
ENSG00000242798.1	-0.208	9.58213e-06
ENSG00000164053.19	-0.208	9.59157e-06
ENSG00000168995.13	-0.208	9.59644e-06
ENSG00000100258.17	0.2079	9.74039e-06
ENSG00000101342.9	0.2078	9.77295e-06
ENSG00000176083.17	0.2078	9.82307e-06
ENSG00000163346.16	0.2078	9.841e-06
ENSG00000236088.9	0.2077	9.88794e-06
ENSG00000178776.4	0.2077	9.92566e-06
ENSG00000226742.3	0.2077	9.96217e-06
ENSG00000103496.14	0.2076	1.00463e-05
ENSG00000267886.1	-0.2076	1.00659e-05
ENSG00000103245.13	0.2075	1.01366e-05
ENSG00000167720.12	-0.2075	1.01377e-05
ENSG00000270154.1	0.2075	1.01668e-05
ENSG00000272465.1	0.2075	1.01669e-05
ENSG00000161912.17	0.2074	1.02718e-05
ENSG00000233585.1	0.2073	1.03743e-05
ENSG00000159200.17	0.2073	1.04273e-05
ENSG00000127084.17	0.2072	1.05322e-05
ENSG00000115649.15	-0.2072	1.06123e-05
ENSG00000105374.9	0.2071	1.06246e-05
ENSG00000250848.1	0.2071	1.06449e-05
ENSG00000149968.11	-0.2071	1.06463e-05
ENSG00000251189.1	-0.2071	1.06598e-05
ENSG00000120217.13	0.2071	1.06942e-05
ENSG00000082701.14	-0.207	1.07207e-05
ENSG00000171759.9	0.207	1.07435e-05
ENSG00000271009.2	0.207	1.07449e-05
ENSG00000218996.1	0.2069	1.08519e-05
ENSG00000144847.12	0.2069	1.08549e-05
ENSG00000273447.1	-0.2069	1.08831e-05
ENSG00000100439.10	-0.2068	1.09728e-05
ENSG00000259781.1	0.2068	1.10215e-05
ENSG00000072832.14	0.2068	1.10304e-05
ENSG00000135636.13	-0.2067	1.10925e-05
ENSG00000105732.12	-0.2067	1.11721e-05
ENSG00000171943.11	0.2067	1.11958e-05
ENSG00000120333.4	-0.2067	1.12011e-05
ENSG00000239557.1	0.2066	1.12741e-05
ENSG00000033100.16	-0.2066	1.13108e-05
ENSG00000132510.10	0.2066	1.13258e-05
ENSG00000232352.1	0.2065	1.13635e-05
ENSG00000184731.5	0.2065	1.13914e-05
ENSG00000157103.10	0.2065	1.14354e-05
ENSG00000253878.5	0.2065	1.14394e-05
ENSG00000204842.14	0.2065	1.14457e-05
ENSG00000010165.19	-0.2064	1.14524e-05
ENSG00000231346.5	0.2064	1.14891e-05
ENSG00000167644.11	0.2064	1.15569e-05
ENSG00000135722.8	0.2063	1.16562e-05
ENSG00000123989.13	0.2063	1.1686e-05
ENSG00000107611.14	0.2063	1.16862e-05
ENSG00000114745.13	-0.2062	1.17833e-05
ENSG00000280042.1	0.2061	1.19207e-05
ENSG00000125755.18	0.2061	1.19403e-05
ENSG00000267834.1	0.2061	1.1979e-05
ENSG00000278041.1	0.2059	1.22134e-05
ENSG00000142233.11	0.2059	1.22593e-05
ENSG00000224186.8	-0.2059	1.22696e-05
ENSG00000279237.1	0.2059	1.22713e-05
ENSG00000175106.16	0.2058	1.22878e-05
ENSG00000188735.12	0.2058	1.22896e-05
ENSG00000213064.9	-0.2058	1.22942e-05
ENSG00000276945.1	-0.2058	1.23766e-05
ENSG00000212907.2	-0.2058	1.238e-05
ENSG00000213735.2	0.2057	1.24596e-05
ENSG00000138685.13	0.2057	1.24842e-05
ENSG00000159496.14	0.2057	1.24904e-05
ENSG00000132182.11	0.2057	1.24919e-05
ENSG00000278341.1	0.2057	1.25361e-05
ENSG00000125826.20	0.2056	1.254e-05
ENSG00000165140.9	0.2056	1.25401e-05
ENSG00000197989.13	0.2056	1.25878e-05
ENSG00000277559.1	0.2056	1.26545e-05
ENSG00000211584.13	-0.2055	1.26832e-05
ENSG00000157600.11	-0.2055	1.2729e-05
ENSG00000105771.13	0.2055	1.27725e-05
ENSG00000119227.7	0.2054	1.29244e-05
ENSG00000124813.20	0.2054	1.29739e-05
ENSG00000164056.10	0.2053	1.30637e-05
ENSG00000131115.15	0.2053	1.30862e-05
ENSG00000082512.14	0.2053	1.31017e-05
ENSG00000197599.12	0.2052	1.31354e-05
ENSG00000259744.1	-0.2052	1.31759e-05
ENSG00000283031.1	0.2052	1.31968e-05
ENSG00000275441.1	0.2052	1.32334e-05
ENSG00000201435.1	0.2052	1.32376e-05
ENSG00000237977.1	0.2051	1.32691e-05
ENSG00000164743.4	-0.205	1.35243e-05
ENSG00000161057.11	-0.205	1.35435e-05
ENSG00000197530.12	0.205	1.35467e-05
ENSG00000128536.15	0.2049	1.36679e-05
ENSG00000010322.15	0.2048	1.37469e-05
ENSG00000196531.10	0.2048	1.37474e-05
ENSG00000047315.15	-0.2048	1.3763e-05
ENSG00000120942.13	-0.2048	1.37876e-05
ENSG00000215788.9	0.2048	1.38223e-05
ENSG00000235505.7	0.2048	1.38624e-05
ENSG00000197813.5	0.2047	1.39314e-05
ENSG00000184786.5	0.2047	1.39922e-05
ENSG00000125534.9	0.2047	1.39957e-05
ENSG00000225931.3	0.2046	1.40571e-05
ENSG00000277299.1	0.2046	1.41215e-05
ENSG00000213366.12	0.2046	1.41566e-05
ENSG00000179151.11	-0.2045	1.41983e-05
ENSG00000205790.1	-0.2045	1.42136e-05
ENSG00000276032.1	0.2045	1.42335e-05
ENSG00000259315.1	0.2045	1.42987e-05
ENSG00000268087.1	-0.2045	1.43078e-05
ENSG00000174307.6	0.2044	1.44293e-05
ENSG00000135333.13	0.2044	1.44363e-05
ENSG00000270344.2	0.2044	1.44515e-05
ENSG00000272832.1	0.2044	1.44964e-05
ENSG00000117281.15	-0.2043	1.45395e-05
ENSG00000223855.1	0.2043	1.45953e-05
ENSG00000273486.1	-0.2043	1.46315e-05
ENSG00000117360.12	0.2043	1.46365e-05
ENSG00000115556.13	0.2043	1.46376e-05
ENSG00000237438.7	0.2042	1.46573e-05
ENSG00000090006.17	0.2042	1.46587e-05
ENSG00000237886.1	0.2042	1.46599e-05
ENSG00000169612.3	-0.2042	1.47856e-05
ENSG00000118271.9	0.2041	1.4787e-05
ENSG00000137411.16	0.2041	1.47913e-05
ENSG00000175267.14	0.2041	1.47915e-05
ENSG00000111674.8	0.2041	1.47985e-05
ENSG00000118418.14	0.204	1.4947e-05
ENSG00000181284.2	-0.2041	1.49493e-05
ENSG00000146842.16	-0.204	1.50323e-05
ENSG00000170881.4	-0.204	1.50559e-05
ENSG00000105750.14	-0.2039	1.51432e-05
ENSG00000235706.7	0.2039	1.52598e-05
ENSG00000256609.1	0.2038	1.52994e-05
ENSG00000106538.9	0.2038	1.53168e-05
ENSG00000253829.1	0.2038	1.53748e-05
ENSG00000182796.13	0.2038	1.53809e-05
ENSG00000198720.12	0.2038	1.54468e-05
ENSG00000158717.10	0.2037	1.54991e-05
ENSG00000064687.12	0.2037	1.55086e-05
ENSG00000171163.15	0.2037	1.5522e-05
ENSG00000198276.15	0.2037	1.55252e-05
ENSG00000264573.2	0.2037	1.55292e-05
ENSG00000161692.17	0.2037	1.55347e-05
ENSG00000114395.10	-0.2037	1.55486e-05
ENSG00000196923.13	0.2036	1.56689e-05
ENSG00000228782.7	0.2036	1.56693e-05
ENSG00000105559.11	0.2036	1.56715e-05
ENSG00000259248.5	0.2036	1.56722e-05
ENSG00000064607.16	0.2036	1.56763e-05
ENSG00000171044.10	0.2036	1.56769e-05
ENSG00000140497.16	-0.2036	1.56832e-05
ENSG00000116783.14	0.2035	1.59021e-05
ENSG00000229089.6	0.2034	1.59499e-05
ENSG00000277986.1	0.2034	1.59522e-05
ENSG00000155256.17	0.2034	1.60166e-05
ENSG00000262903.1	0.2034	1.60617e-05
ENSG00000255882.1	0.2033	1.6105e-05
ENSG00000276334.1	0.2033	1.61231e-05
ENSG00000105248.15	-0.2033	1.613e-05
ENSG00000167393.17	0.2033	1.61436e-05
ENSG00000234353.2	0.2032	1.62529e-05
ENSG00000185955.4	0.2033	1.62608e-05
ENSG00000127585.11	0.2032	1.62832e-05
ENSG00000242748.1	-0.2032	1.62973e-05
ENSG00000250412.1	0.2032	1.64193e-05
ENSG00000121318.2	-0.2031	1.6596e-05
ENSG00000206149.10	0.2031	1.65993e-05
ENSG00000224597.9	0.2031	1.66047e-05
ENSG00000081154.11	0.203	1.67156e-05
ENSG00000004534.14	0.203	1.67657e-05
ENSG00000197296.5	-0.203	1.67852e-05
ENSG00000109625.18	0.2029	1.69009e-05
ENSG00000234062.7	0.2028	1.70206e-05
ENSG00000065833.8	-0.2028	1.71504e-05
ENSG00000263826.1	-0.2028	1.71919e-05
ENSG00000197769.5	-0.2028	1.71959e-05
ENSG00000238199.1	-0.2026	1.74477e-05
ENSG00000213413.2	0.2026	1.74514e-05
ENSG00000143502.14	0.2026	1.74553e-05
ENSG00000179406.7	0.2026	1.74562e-05
ENSG00000119737.5	-0.2026	1.74574e-05
ENSG00000272777.1	-0.2026	1.75136e-05
ENSG00000055813.5	0.2025	1.76274e-05
ENSG00000163660.11	0.2025	1.77053e-05
ENSG00000078589.12	0.2025	1.77482e-05
ENSG00000127527.13	0.2024	1.7806e-05
ENSG00000234724.1	0.2024	1.7847e-05
ENSG00000251023.1	0.2024	1.78945e-05
ENSG00000132879.13	0.2024	1.79009e-05
ENSG00000070718.11	0.2024	1.79409e-05
ENSG00000091536.16	0.2023	1.80217e-05
ENSG00000162650.16	0.2023	1.80824e-05
ENSG00000143384.12	0.2023	1.81208e-05
ENSG00000267107.6	0.2022	1.81753e-05
ENSG00000225450.1	0.2022	1.81772e-05
ENSG00000275910.1	0.2021	1.84127e-05
ENSG00000174370.9	0.2021	1.84164e-05
ENSG00000230433.1	0.2021	1.84201e-05
ENSG00000099308.10	0.2021	1.84877e-05
ENSG00000244723.3	0.2021	1.84925e-05
ENSG00000197894.10	-0.202	1.85862e-05
ENSG00000151687.14	0.202	1.88085e-05
ENSG00000103154.9	0.2019	1.89486e-05
ENSG00000262251.1	0.2018	1.90966e-05
ENSG00000173467.8	0.2018	1.91605e-05
ENSG00000073605.18	0.2018	1.91961e-05
ENSG00000136367.13	0.2018	1.92016e-05
ENSG00000111860.13	0.2017	1.94684e-05
ENSG00000180616.8	-0.2016	1.94832e-05
ENSG00000140983.13	0.2016	1.95116e-05
ENSG00000258900.1	0.2016	1.95964e-05
ENSG00000117115.12	0.2016	1.96712e-05
ENSG00000235821.1	0.2015	1.97285e-05
ENSG00000198556.13	0.2015	1.97693e-05
ENSG00000226067.6	0.2015	1.98005e-05
ENSG00000248923.1	-0.2015	1.98969e-05
ENSG00000139899.10	0.2014	2.01127e-05
ENSG00000001630.15	-0.2013	2.0264e-05
ENSG00000219626.8	0.2012	2.05724e-05
ENSG00000113721.13	-0.2012	2.05734e-05
ENSG00000275601.1	0.2011	2.08616e-05
ENSG00000175110.11	-0.2011	2.08953e-05
ENSG00000147383.10	-0.201	2.09704e-05
ENSG00000178980.14	0.201	2.09831e-05
ENSG00000155659.14	-0.2009	2.11498e-05
ENSG00000101680.14	0.2009	2.11736e-05
ENSG00000069248.11	-0.2008	2.14726e-05
ENSG00000224259.6	0.2008	2.15068e-05
ENSG00000205809.9	0.2008	2.15185e-05
ENSG00000140678.16	0.2008	2.15271e-05
ENSG00000203739.3	0.2008	2.15441e-05
ENSG00000240533.3	0.2008	2.15933e-05
ENSG00000278238.1	0.2008	2.15933e-05
ENSG00000143178.12	0.2007	2.15963e-05
ENSG00000249661.1	0.2007	2.16402e-05
ENSG00000122223.12	0.2007	2.16875e-05
ENSG00000145781.8	0.2007	2.16915e-05
ENSG00000172116.21	0.2007	2.17644e-05
ENSG00000220785.7	0.2007	2.17797e-05
ENSG00000158793.13	0.2007	2.1785e-05
ENSG00000273368.1	0.2006	2.19138e-05
ENSG00000226031.5	0.2005	2.20802e-05
ENSG00000173812.10	0.2005	2.20957e-05
ENSG00000242028.6	0.2005	2.22064e-05
ENSG00000244681.1	0.2004	2.2298e-05
ENSG00000104907.12	0.2004	2.2401e-05
ENSG00000279632.1	-0.2003	2.26506e-05
ENSG00000268069.2	0.2003	2.27091e-05
ENSG00000254341.2	0.2003	2.27793e-05
ENSG00000255987.1	0.2002	2.30778e-05
ENSG00000272645.3	0.2001	2.31168e-05
ENSG00000168924.14	-0.2001	2.31224e-05
ENSG00000163531.15	0.2001	2.31635e-05
ENSG00000099917.17	0.2001	2.31926e-05
ENSG00000167468.16	0.2001	2.33283e-05
ENSG00000188038.7	0.2	2.33526e-05
ENSG00000148154.9	0.2	2.34241e-05
ENSG00000221968.8	0.2	2.34672e-05
ENSG00000204060.6	0.2	2.35277e-05
ENSG00000229715.4	0.1999	2.3638e-05
ENSG00000100811.12	0.1999	2.3646e-05
ENSG00000144674.16	0.1999	2.37055e-05
ENSG00000167702.11	0.1999	2.37064e-05
ENSG00000261488.1	0.1999	2.38137e-05
ENSG00000170144.20	0.1998	2.38279e-05
ENSG00000174255.6	0.1998	2.38431e-05
ENSG00000108309.13	0.1998	2.3856e-05
ENSG00000258876.1	0.1998	2.39063e-05
ENSG00000261604.1	-0.1998	2.40295e-05
ENSG00000106144.19	-0.1997	2.40945e-05
ENSG00000169733.11	0.1997	2.4144e-05
ENSG00000117477.12	0.1997	2.42285e-05
ENSG00000185186.8	0.1997	2.42968e-05
ENSG00000122574.10	0.1996	2.43869e-05
ENSG00000225681.2	0.1996	2.44948e-05
ENSG00000138722.9	-0.1996	2.45356e-05
ENSG00000198771.10	-0.1995	2.47554e-05
ENSG00000073803.13	0.1994	2.50048e-05
ENSG00000166920.12	0.1994	2.50912e-05
ENSG00000205832.7	0.1994	2.50913e-05
ENSG00000102125.15	0.1993	2.52107e-05
ENSG00000033800.13	-0.1993	2.52256e-05
ENSG00000269688.1	-0.1993	2.52546e-05
ENSG00000167112.9	-0.1993	2.52602e-05
ENSG00000128567.16	-0.1993	2.53252e-05
ENSG00000092978.10	0.1992	2.54887e-05
ENSG00000166855.9	-0.1991	2.59917e-05
ENSG00000196371.3	-0.1991	2.60293e-05
ENSG00000198270.12	0.199	2.62598e-05
ENSG00000091972.18	0.199	2.62988e-05
ENSG00000263089.1	-0.1989	2.64082e-05
ENSG00000198833.6	-0.1989	2.64547e-05
ENSG00000237836.5	0.1989	2.64986e-05
ENSG00000223802.7	0.1989	2.65352e-05
ENSG00000124772.11	0.1989	2.65701e-05
ENSG00000110848.8	0.1988	2.66491e-05
ENSG00000160856.20	0.1988	2.66514e-05
ENSG00000125726.10	0.1988	2.67163e-05
ENSG00000279662.1	0.1987	2.69823e-05
ENSG00000275132.1	-0.1987	2.69964e-05
ENSG00000167601.11	-0.1987	2.70071e-05
ENSG00000267519.5	0.1985	2.7637e-05
ENSG00000172575.11	0.1985	2.77034e-05
ENSG00000008988.9	0.1985	2.77861e-05
ENSG00000003509.15	0.1985	2.78023e-05
ENSG00000199631.1	0.1984	2.79324e-05
ENSG00000258839.3	0.1984	2.79689e-05
ENSG00000226803.7	0.1984	2.79739e-05
ENSG00000175354.18	0.1984	2.80465e-05
ENSG00000155428.12	0.1984	2.80614e-05
ENSG00000169016.16	-0.1983	2.8164e-05
ENSG00000236790.5	0.1983	2.82348e-05
ENSG00000104228.12	-0.1983	2.82825e-05
ENSG00000257591.5	-0.1983	2.83399e-05
ENSG00000232186.1	0.1983	2.83447e-05
ENSG00000119729.11	0.1983	2.8416e-05
ENSG00000256039.1	0.1982	2.84566e-05
ENSG00000173272.15	0.1982	2.8501e-05
ENSG00000166012.16	0.1982	2.8595e-05
ENSG00000255284.1	0.1982	2.86211e-05
ENSG00000090382.6	-0.1982	2.86239e-05
ENSG00000116016.13	-0.1982	2.8629e-05
ENSG00000139187.9	0.1981	2.90175e-05
ENSG00000275426.1	0.198	2.91454e-05
ENSG00000178950.16	0.198	2.91538e-05
ENSG00000105127.8	-0.198	2.92537e-05
ENSG00000125843.10	-0.1979	2.93747e-05
ENSG00000247498.9	0.1979	2.94229e-05
ENSG00000128422.15	0.1979	2.96053e-05
ENSG00000161921.14	0.1979	2.96885e-05
ENSG00000164080.13	-0.1978	2.97965e-05
ENSG00000187889.12	0.1978	2.98015e-05
ENSG00000120742.10	0.1978	2.98025e-05
ENSG00000206612.1	-0.1978	2.98447e-05
ENSG00000189171.14	0.1978	2.99415e-05
ENSG00000239257.1	0.1977	3.00841e-05
ENSG00000131355.14	0.1977	3.02184e-05
ENSG00000176222.8	0.1976	3.03805e-05
ENSG00000147905.17	0.1976	3.06319e-05
ENSG00000171914.16	-0.1976	3.06618e-05
ENSG00000213780.10	0.1976	3.06669e-05
ENSG00000270035.1	0.1975	3.0668e-05
ENSG00000227740.1	-0.1975	3.06818e-05
ENSG00000283787.1	0.1975	3.06833e-05
ENSG00000137558.7	-0.1975	3.08676e-05
ENSG00000255769.7	0.1975	3.09391e-05
ENSG00000281404.1	0.1975	3.09536e-05
ENSG00000071073.12	0.1974	3.10244e-05
ENSG00000171223.5	0.1974	3.11401e-05
ENSG00000257815.5	0.1974	3.11458e-05
ENSG00000185869.14	-0.1974	3.12461e-05
ENSG00000156873.15	0.1974	3.12512e-05
ENSG00000238198.1	0.1974	3.1264e-05
ENSG00000231105.1	0.1973	3.1372e-05
ENSG00000204315.3	-0.1973	3.14837e-05
ENSG00000271811.1	0.1973	3.14969e-05
ENSG00000260804.3	-0.1973	3.15526e-05
ENSG00000152213.3	-0.1972	3.15749e-05
ENSG00000177946.5	-0.1972	3.15956e-05
ENSG00000223745.7	0.1972	3.16004e-05
ENSG00000267904.1	-0.1972	3.16679e-05
ENSG00000267653.1	-0.1972	3.1747e-05
ENSG00000167384.10	-0.1972	3.17475e-05
ENSG00000147121.15	0.1972	3.1764e-05
ENSG00000146013.10	0.1971	3.19041e-05
ENSG00000178055.11	0.1971	3.19361e-05
ENSG00000165795.23	-0.1971	3.1955e-05
ENSG00000225234.1	0.1971	3.19703e-05
ENSG00000134539.16	0.1971	3.20105e-05
ENSG00000231607.10	0.1971	3.20281e-05
ENSG00000180777.13	0.197	3.22529e-05
ENSG00000163617.10	0.197	3.22531e-05
ENSG00000092201.9	-0.1969	3.25768e-05
ENSG00000235330.2	0.1969	3.26505e-05
ENSG00000135245.9	0.1969	3.28037e-05
ENSG00000022567.9	0.1969	3.28578e-05
ENSG00000116213.15	0.1968	3.28864e-05
ENSG00000206140.10	0.1968	3.30673e-05
ENSG00000260597.1	-0.1968	3.30733e-05
ENSG00000054282.15	0.1968	3.32016e-05
ENSG00000078142.12	-0.1968	3.32103e-05
ENSG00000119203.13	-0.1967	3.32924e-05
ENSG00000089692.8	0.1967	3.33128e-05
ENSG00000169436.16	0.1967	3.34898e-05
ENSG00000223797.5	0.1967	3.3546e-05
ENSG00000238098.9	0.1967	3.35472e-05
ENSG00000228727.8	0.1966	3.35771e-05
ENSG00000204520.12	0.1966	3.35777e-05
ENSG00000120696.8	-0.1966	3.36057e-05
ENSG00000188004.9	0.1966	3.36445e-05
ENSG00000274964.1	0.1965	3.39482e-05
ENSG00000274204.1	0.1965	3.39551e-05
ENSG00000204149.10	0.1965	3.39745e-05
ENSG00000044446.11	0.1965	3.40994e-05
ENSG00000196196.2	-0.1964	3.43911e-05
ENSG00000250740.1	-0.1964	3.43917e-05
ENSG00000166922.8	0.1964	3.43939e-05
ENSG00000152117.17	0.1964	3.44758e-05
ENSG00000102977.13	0.1964	3.44841e-05
ENSG00000139269.2	0.1964	3.45537e-05
ENSG00000169385.2	-0.1963	3.45643e-05
ENSG00000261644.2	0.1964	3.45666e-05
ENSG00000105287.12	0.1963	3.47579e-05
ENSG00000133112.16	0.1963	3.47705e-05
ENSG00000228624.7	0.1963	3.48915e-05
ENSG00000236432.7	0.1963	3.49173e-05
ENSG00000140280.13	0.1962	3.49601e-05
ENSG00000261302.5	0.1962	3.51932e-05
ENSG00000280184.2	-0.1962	3.52262e-05
ENSG00000204717.4	0.1961	3.53598e-05
ENSG00000203780.10	0.1961	3.54623e-05
ENSG00000188599.17	0.1961	3.54996e-05
ENSG00000171658.8	-0.196	3.56508e-05
ENSG00000266844.1	-0.1961	3.56644e-05
ENSG00000172478.17	0.1961	3.5684e-05
ENSG00000179021.9	-0.196	3.57342e-05
ENSG00000225213.2	0.196	3.58599e-05
ENSG00000228672.3	-0.196	3.59395e-05
ENSG00000277959.1	0.1959	3.59981e-05
ENSG00000272872.1	0.1959	3.60177e-05
ENSG00000248936.1	0.196	3.6025e-05
ENSG00000127415.12	0.1959	3.63852e-05
ENSG00000123297.17	-0.1958	3.66951e-05
ENSG00000197265.8	0.1958	3.67253e-05
ENSG00000261087.1	0.1957	3.69225e-05
ENSG00000215440.11	0.1957	3.69457e-05
ENSG00000166323.12	0.1957	3.70405e-05
ENSG00000178700.7	-0.1957	3.70483e-05
ENSG00000171860.4	-0.1957	3.71567e-05
ENSG00000072864.14	0.1956	3.72383e-05
ENSG00000034693.14	-0.1956	3.72758e-05
ENSG00000171608.15	0.1956	3.73111e-05
ENSG00000161040.16	0.1956	3.7493e-05
ENSG00000265489.1	0.1955	3.76057e-05
ENSG00000163736.3	0.1955	3.77477e-05
ENSG00000033867.16	0.1955	3.77768e-05
ENSG00000112149.9	0.1955	3.78968e-05
ENSG00000279881.1	-0.1955	3.79159e-05
ENSG00000283635.1	0.1955	3.79203e-05
ENSG00000142871.16	0.1955	3.79247e-05
ENSG00000080166.15	0.1954	3.79756e-05
ENSG00000108691.9	0.1954	3.81817e-05
ENSG00000225127.2	0.1954	3.83303e-05
ENSG00000100814.17	0.1953	3.84423e-05
ENSG00000187260.15	0.1953	3.8458e-05
ENSG00000175455.14	0.1953	3.84849e-05
ENSG00000235482.1	0.1953	3.85368e-05
ENSG00000175322.11	0.1953	3.85854e-05
ENSG00000279807.1	0.1953	3.87103e-05
ENSG00000163630.10	0.1952	3.88217e-05
ENSG00000179388.8	0.1952	3.91198e-05
ENSG00000151948.11	0.1951	3.92195e-05
ENSG00000279198.1	0.1951	3.95214e-05
ENSG00000275395.4	-0.1951	3.95382e-05
ENSG00000165935.9	0.1951	3.9547e-05
ENSG00000160271.14	0.195	3.96355e-05
ENSG00000222020.2	0.195	4.007e-05
ENSG00000170558.8	0.1949	4.03445e-05
ENSG00000279357.1	0.1949	4.04133e-05
ENSG00000113108.19	0.1949	4.0487e-05
ENSG00000130695.14	-0.1948	4.05887e-05
ENSG00000134815.18	0.1948	4.05971e-05
ENSG00000110011.13	0.1948	4.06202e-05
ENSG00000272578.5	0.1947	4.09723e-05
ENSG00000198547.8	0.1947	4.09809e-05
ENSG00000138639.17	-0.1947	4.10045e-05
ENSG00000130005.12	0.1947	4.10732e-05
ENSG00000090316.15	0.1947	4.10736e-05
ENSG00000121807.5	-0.1947	4.12238e-05
ENSG00000130700.6	0.1946	4.13753e-05
ENSG00000152527.13	0.1946	4.14388e-05
ENSG00000178084.1	-0.1946	4.15687e-05
ENSG00000125733.17	0.1946	4.171e-05
ENSG00000182809.10	0.1946	4.17307e-05
ENSG00000180902.17	0.1946	4.17313e-05
ENSG00000109787.12	-0.1946	4.17396e-05
ENSG00000158710.14	0.1945	4.18124e-05
ENSG00000275562.1	0.1945	4.1817e-05
ENSG00000203392.3	0.1945	4.19852e-05
ENSG00000137198.9	0.1944	4.23587e-05
ENSG00000065183.15	-0.1944	4.2436e-05
ENSG00000180747.15	0.1944	4.24928e-05
ENSG00000231106.2	0.1944	4.26206e-05
ENSG00000273373.1	0.1943	4.26702e-05
ENSG00000185347.17	0.1943	4.27648e-05
ENSG00000223564.1	0.1943	4.2774e-05
ENSG00000078900.14	0.1943	4.28051e-05
ENSG00000039560.13	0.1943	4.293e-05
ENSG00000203489.3	0.1943	4.29343e-05
ENSG00000163166.14	0.1943	4.30077e-05
ENSG00000147036.11	0.1942	4.30412e-05
ENSG00000038532.14	0.1942	4.30556e-05
ENSG00000160058.18	0.1942	4.32439e-05
ENSG00000128886.11	0.1942	4.32704e-05
ENSG00000117450.13	-0.1941	4.38344e-05
ENSG00000167604.13	0.194	4.40932e-05
ENSG00000175115.11	0.194	4.41152e-05
ENSG00000114656.10	0.194	4.42784e-05
ENSG00000130803.14	-0.1939	4.46799e-05
ENSG00000250829.2	0.1939	4.46945e-05
ENSG00000143476.17	-0.1939	4.47278e-05
ENSG00000127191.17	0.1939	4.47486e-05
ENSG00000101197.12	0.1939	4.48874e-05
ENSG00000125910.5	-0.1938	4.50286e-05
ENSG00000135625.7	0.1938	4.50425e-05
ENSG00000280020.1	0.1938	4.50487e-05
ENSG00000140153.17	-0.1938	4.52174e-05
ENSG00000103160.11	-0.1938	4.52353e-05
ENSG00000151789.10	0.1938	4.52496e-05
ENSG00000141258.12	0.1938	4.52681e-05
ENSG00000279203.1	-0.1937	4.55511e-05
ENSG00000134061.5	-0.1937	4.55809e-05
ENSG00000169894.17	0.1937	4.57958e-05
ENSG00000268499.1	-0.1936	4.58362e-05
ENSG00000141497.13	0.1936	4.58496e-05
ENSG00000083844.10	-0.1936	4.616e-05
ENSG00000153283.12	0.1936	4.61849e-05
ENSG00000128311.13	-0.1936	4.61967e-05
ENSG00000241769.7	0.1935	4.6336e-05
ENSG00000235257.8	0.1935	4.6358e-05
ENSG00000196139.13	-0.1935	4.66247e-05
ENSG00000171989.5	0.1935	4.66591e-05
ENSG00000173530.5	0.1934	4.67869e-05
ENSG00000229473.2	0.1934	4.69215e-05
ENSG00000138829.11	0.1934	4.69284e-05
ENSG00000237721.1	0.1934	4.70218e-05
ENSG00000183598.3	0.1934	4.71513e-05
ENSG00000231064.7	0.1934	4.72385e-05
ENSG00000131475.6	-0.1933	4.73443e-05
ENSG00000223482.7	0.1933	4.75102e-05
ENSG00000178301.3	-0.1933	4.75876e-05
ENSG00000137936.16	-0.1933	4.7649e-05
ENSG00000225715.1	0.1932	4.78433e-05
ENSG00000236841.7	0.1932	4.78595e-05
ENSG00000163239.12	0.1932	4.78753e-05
ENSG00000260277.1	-0.1932	4.78772e-05
ENSG00000257556.1	0.1932	4.80791e-05
ENSG00000172673.10	0.1931	4.81984e-05
ENSG00000279384.1	0.1931	4.81992e-05
ENSG00000153347.9	0.1931	4.82173e-05
ENSG00000237515.8	0.1931	4.82306e-05
ENSG00000233384.2	0.1931	4.82418e-05
ENSG00000139974.15	0.1931	4.843e-05
ENSG00000245534.6	0.1931	4.86305e-05
ENSG00000278705.1	0.193	4.87092e-05
ENSG00000269243.1	-0.193	4.88034e-05
ENSG00000230453.9	0.193	4.89069e-05
ENSG00000223086.1	0.193	4.91239e-05
ENSG00000256591.5	0.193	4.91287e-05
ENSG00000110274.15	0.1929	4.92045e-05
ENSG00000182578.13	-0.1929	4.92161e-05
ENSG00000168993.14	0.1929	4.92796e-05
ENSG00000235978.6	0.1929	4.93613e-05
ENSG00000111912.19	0.1929	4.9371e-05
ENSG00000270606.1	0.1929	4.95484e-05
ENSG00000164403.14	0.1928	4.96221e-05
ENSG00000225783.6	0.1928	4.97348e-05
ENSG00000203930.10	0.1928	4.98567e-05
ENSG00000165113.12	0.1928	4.98567e-05
ENSG00000267174.5	0.1928	4.98644e-05
ENSG00000116678.19	0.1928	4.98649e-05
ENSG00000214455.4	0.1928	4.98683e-05
ENSG00000260616.6	0.1928	4.98879e-05
ENSG00000155966.13	-0.1927	5.01151e-05
ENSG00000176809.10	0.1927	5.01356e-05
ENSG00000176563.9	-0.1927	5.01605e-05
ENSG00000228569.1	0.1927	5.02352e-05
ENSG00000184402.14	0.1926	5.05668e-05
ENSG00000108107.14	0.1926	5.06933e-05
ENSG00000127511.9	0.1926	5.07025e-05
ENSG00000117643.14	0.1926	5.07587e-05
ENSG00000259392.2	0.1926	5.08022e-05
ENSG00000102870.5	-0.1925	5.13775e-05
ENSG00000131044.16	0.1925	5.16092e-05
ENSG00000113520.10	0.1924	5.17639e-05
ENSG00000146122.16	-0.1924	5.1935e-05
ENSG00000267197.1	-0.1924	5.19895e-05
ENSG00000204219.9	0.1924	5.20148e-05
ENSG00000115459.17	0.1924	5.20347e-05
ENSG00000236283.4	0.1923	5.21868e-05
ENSG00000125503.12	0.1923	5.2234e-05
ENSG00000276174.1	0.1923	5.24906e-05
ENSG00000278493.1	0.1923	5.26887e-05
ENSG00000259910.1	0.1922	5.27782e-05
ENSG00000197128.11	-0.1922	5.28586e-05
ENSG00000280159.1	0.1922	5.2862e-05
ENSG00000228288.6	0.1922	5.28845e-05
ENSG00000136485.14	-0.1922	5.29233e-05
[truncated: 52,160 more rows]
