# Supplementary material for: Transcriptomic Characteristics Associated With Aging in the Thyroid Gland
Source: Front Nutr. 2022 May 25;9:859702. doi: 10.3389/fnut.2022.859702 (PMC9174607; doi:10.3389/fnut.2022.859702)
Supplement: Supplementary file 3 [file Table_3.XLSX]

## Sheet: Supplementary Table 3
Supplementary Table 3. Complete list of WGCNA modules in TCGA samples (n=58)
Module	Pearson's r	p value	No. of genes
darkturquoise	0.303286	0.0206525	472
mediumorchid	0.297069	0.0235402	194
floralwhite	0.264561	0.044761	295
paleturquoise	0.248412	0.0600735	387
plum	-0.239541	0.0701344	159
plum2	-0.238525	0.0713673	277
darkslateblue	0.23759	0.0725178	280
skyblue3	0.233327	0.077951	339
yellow	0.220672	0.0959933	2603
darkgreen	-0.21512	0.10487	479
purple	-0.201851	0.128644	790
thistle2	0.199893	0.132471	275
brown	-0.198035	0.136181	3523
navajowhite2	0.189104	0.155118	228
yellow4	-0.187529	0.158649	174
lightsteelblue	-0.18319	0.168684	128
coral1	-0.17717	0.183363	202
sienna3	-0.172604	0.195098	356
brown2	-0.169418	0.203595	74
brown4	-0.164683	0.216704	286
tan	0.162051	0.224239	644
salmon	-0.154381	0.247237	621
skyblue1	0.148912	0.264582	162
orangered3	-0.14533	0.276375	146
bisque4	-0.140324	0.293432	284
lightcyan1	0.139905	0.294889	303
darkolivegreen	0.135126	0.311856	374
red	-0.135049	0.312133	2046
lightgreen	-0.132482	0.321506	521
lightyellow	-0.125249	0.348864	497
cyan	-0.121247	0.364596	620
mediumpurple2	-0.120357	0.368155	135
maroon	-0.118704	0.374816	227
lightcoral	-0.108913	0.415746	125
coral2	0.108741	0.416486	196
lightcyan	-0.102425	0.444222	550
firebrick4	0.0995959	0.456973	87
lavenderblush3	0.0963771	0.471718	220
antiquewhite4	0.0951148	0.47757	199
orangered4	-0.093594	0.484671	314
indianred4	0.091906	0.492617	91
ivory	0.0888108	0.507362	302
saddlebrown	-0.0840218	0.530612	398
royalblue	-0.0814466	0.543329	488
steelblue	-0.0813093	0.544011	389
darkviolet	-0.0794037	0.55352	53
skyblue	-0.075877	0.571326	401
yellowgreen	-0.0735696	0.583117	350
darkorange2	0.0727584	0.587288	291
lightpink4	0.0726893	0.587645	221
lightsteelblue1	0.0723054	0.589624	308
black	-0.0712012	0.595334	1579
skyblue2	0.0703823	0.599584	175
grey60	0.0690035	0.60677	536
darkseagreen4	0.0670964	0.616771	214
thistle1	-0.0659552	0.622789	271
honeydew1	-0.0642472	0.631841	215
blue2	0.056459	0.673788	54
plum1	0.055781	0.677489	316
midnightblue	-0.05395	0.687522	560
palevioletred3	0.052748	0.694138	246
blue	-0.0463578	0.72968	4020
darkolivegreen4	-0.0431395	0.747803	79
grey	-0.0416947	0.755983	1464
turquoise	0.0410035	0.759906	10988
salmon4	0.0345749	0.79667	270
darkmagenta	-0.0341054	0.799373	367
pink	0.0336374	0.80207	1069
orange	-0.0330065	0.80571	463
white	-0.0317147	0.813174	402
darkorange	-0.030835	0.818267	445
violet	-0.0272627	0.839022	377
greenyellow	-0.0230353	0.863724	780
magenta	-0.0228251	0.864956	931
darkred	-0.015639	0.907242	486
green	0.011531	0.931539	2598
mediumpurple3	-0.0106279	0.936889	314
darkgrey	0.0076326	0.954654	466
