# Supplementary material for: Transcriptomic Characteristics Associated With Aging in the Thyroid Gland
Source: Front Nutr. 2022 May 25;9:859702. doi: 10.3389/fnut.2022.859702 (PMC9174607; doi:10.3389/fnut.2022.859702)
Supplement: Supplementary file 4 [file Table_4.XLSX]

## Sheet: Supplementary Table 4
Supplementary Table 4. Complete list of WGCNA modules in GTEx samples (n=604)
Module	Pearson's r	p value	No. of genes
darkmagenta	-0.119892	0.00167136	314
thistle	-0.100293	0.0144243	358
white	0.0926764	0.0390203	265
moccasin	-0.0926679	0.0479985	93
green	-0.0781071	0.0929593	1991
maroon	0.0752236	0.0967097	133
antiquewhite1	-0.0732474	0.0977725	741
tan	0.0706376	0.120194	788
greenyellow	0.0703002	0.113696	811
coral2	-0.0664401	0.130253	150
cyan	-0.0627483	0.159924	601
mediumpurple	-0.061796	0.159181	74
lavenderblush3	0.0585271	0.177569	85
saddlebrown	0.0550173	0.206739	215
yellowgreen	-0.0538502	0.209738	153
plum1	0.0532937	0.207779	143
steelblue	0.0531924	0.202376	203
coral1	0.0531463	0.19715	80
darkorange2	0.0530271	0.193111	142
thistle1	-0.0520025	0.202427	155
coral3	0.0510082	0.211751	221
grey2	-0.0501436	0.225379	451
paleturquoise	0.0500903	0.22109	171
brown4	-0.0498206	0.219161	108
pink	-0.04891	0.223393	1393
salmon1	0.0474706	0.232849	112
indianred4	-0.0472589	0.230976	65
salmon2	0.0466875	0.242189	227
darkolivegreen	0.0441518	0.273838	262
lightyellow	0.0434527	0.28209	371
darkred	-0.0430379	0.282357	270
darkorange	0.0429688	0.279075	337
darkgreen	0.0420212	0.295134	328
lightgreen	-0.041118	0.306134	395
yellow	0.0407259	0.306586	2016
orangered	0.0400101	0.31091	167
skyblue3	0.0397974	0.318972	152
mediumorchid	0.0394315	0.319429	204
skyblue1	0.0389451	0.330619	159
darkturquoise	0.0385913	0.340148	292
violet	0.0379312	0.348951	170
coral	0.0372092	0.354131	212
ivory	0.0358605	0.381427	113
plum2	0.0356577	0.379996	99
lightsteelblue1	0.0353354	0.380285	126
lightcyan1	0.034894	0.382263	152
midnightblue	0.0332083	0.405687	595
skyblue2	-0.0331449	0.402663	74
navajowhite2	0.0328988	0.402256	221
magenta	0.0299774	0.453639	1177
turquoise	-0.0294303	0.457517	3681
yellow3	0.0288724	0.466508	613
brown	-0.028739	0.46444	2563
mediumpurple4	0.0281552	0.478696	147
black	-0.025943	0.518441	1545
darkolivegreen1	0.0255649	0.520069	265
deeppink	-0.0230171	0.561761	72
plum3	0.0204992	0.61569	62
grey	0.0191484	0.634083	19310
floralwhite	0.0190402	0.631003	111
tomato	-0.0168895	0.663545	106
darkslateblue	0.0166161	0.663393	335
blue	0.0102568	0.819047	2636
darkviolet	0.009938	0.818997	298
orangered4	-0.00873675	0.862976	141
honeydew	0.00762188	0.878598	129
red	-0.00735962	0.877361	1557
royalblue	-0.00724583	0.873337	319
skyblue	-0.00713152	0.876061	219
darkgrey	-0.00666441	0.879142	289
palevioletred	0.00482812	0.915663	111
orange	-0.00309691	0.957216	244
brown1	0.00218201	0.968978	78
darkolivegreen2	-0.00129163	0.980217	44
yellow4	4.35948e-05	0.992208	74
purple	2.6035e-05	0.999491	1074
